# Supplementary material for: The unique composition of Indian gut microbiome, gene catalogue, and associated fecal metabolome deciphered using multi-omics approaches
Source: PubMed Central journal article supplement (PMC6394208; doi:10.1093/gigascience/giz004), 2019-01-30

# GigaScience

## The unique composition of Indian gut microbiome, gene catalogue and associated faecal metabolome deciphered using multi-omics approaches

--Manuscript Draft--

|                                                      |                                                                                                                                                                                                                                                                                                                                                                                                                                                                                                                                                                                                                                                                                                                                                                                                                                                                                                                                                                                                                                                                                                                                                                                                                                                                                                                                                                                                                                                                                                                                                                                                                                                                                                                                                                                                                                                                                                                                                                                                                                                                                                             |
|------------------------------------------------------|-------------------------------------------------------------------------------------------------------------------------------------------------------------------------------------------------------------------------------------------------------------------------------------------------------------------------------------------------------------------------------------------------------------------------------------------------------------------------------------------------------------------------------------------------------------------------------------------------------------------------------------------------------------------------------------------------------------------------------------------------------------------------------------------------------------------------------------------------------------------------------------------------------------------------------------------------------------------------------------------------------------------------------------------------------------------------------------------------------------------------------------------------------------------------------------------------------------------------------------------------------------------------------------------------------------------------------------------------------------------------------------------------------------------------------------------------------------------------------------------------------------------------------------------------------------------------------------------------------------------------------------------------------------------------------------------------------------------------------------------------------------------------------------------------------------------------------------------------------------------------------------------------------------------------------------------------------------------------------------------------------------------------------------------------------------------------------------------------------------|
| <b>Manuscript Number:</b>                            | GIGA-D-18-00212R2                                                                                                                                                                                                                                                                                                                                                                                                                                                                                                                                                                                                                                                                                                                                                                                                                                                                                                                                                                                                                                                                                                                                                                                                                                                                                                                                                                                                                                                                                                                                                                                                                                                                                                                                                                                                                                                                                                                                                                                                                                                                                           |
| <b>Full Title:</b>                                   | The unique composition of Indian gut microbiome, gene catalogue and associated faecal metabolome deciphered using multi-omics approaches                                                                                                                                                                                                                                                                                                                                                                                                                                                                                                                                                                                                                                                                                                                                                                                                                                                                                                                                                                                                                                                                                                                                                                                                                                                                                                                                                                                                                                                                                                                                                                                                                                                                                                                                                                                                                                                                                                                                                                    |
| <b>Article Type:</b>                                 | Research                                                                                                                                                                                                                                                                                                                                                                                                                                                                                                                                                                                                                                                                                                                                                                                                                                                                                                                                                                                                                                                                                                                                                                                                                                                                                                                                                                                                                                                                                                                                                                                                                                                                                                                                                                                                                                                                                                                                                                                                                                                                                                    |
| <b>Funding Information:</b>                          |                                                                                                                                                                                                                                                                                                                                                                                                                                                                                                                                                                                                                                                                                                                                                                                                                                                                                                                                                                                                                                                                                                                                                                                                                                                                                                                                                                                                                                                                                                                                                                                                                                                                                                                                                                                                                                                                                                                                                                                                                                                                                                             |
| <b>Abstract:</b>                                     | <p>Background</p> <p>Metagenomic studies carried out in the past decade have led to an enhanced understanding of the gut microbiome in human health, however, the Indian gut microbiome is still not well explored. We analysed the gut microbiome of 110 healthy individuals from two distinct locations (North-Central and South) in India using multi-omics approaches, including 16S rRNA gene amplicon sequencing, whole genome shotgun metagenomic sequencing, and metabolomic profiling of faecal and serum samples.</p> <p>Results</p> <p>The gene catalogue established in this study emphasizes the uniqueness of the Indian gut microbiome in comparison to other populations. The gut microbiome of the cohort from North Central India, which was primarily consuming a plant-based diet, was found to be associated with Prevotella, and also showed an enrichment of Branched Chain Amino Acid (BCAA) and lipopolysaccharide (LPS) biosynthesis pathways. In contrast, the gut microbiome of the cohort from Southern India, which was consuming an omnivorous diet, showed associations with Bacteroides, Ruminococcus and Faecalibacterium, and had an enrichment of Short Chain Fatty Acid (SCFA) biosynthesis pathway and BCAA transporters. This corroborated well with the metabolomics results, which showed higher concentration of BCAAs in the serum metabolome of the North-Central cohort and an association with Prevotella. In contrast, the concentration of BCAAs were found higher in the faecal metabolome of the South Indian cohort, and showed a positive correlation with higher abundance of BCAA transporters.</p> <p>Conclusions</p> <p>The study revealed the unique composition of Indian gut microbiome, established the Indian gut microbial gene catalogue, and also compared it with the gut microbiomes from other populations. The functional associations revealed using metagenomic and metabolomic approaches provide novel insights on the gut-microbe-metabolic axis, which will be useful for future epidemiological and translational researches</p> |
| <b>Corresponding Author:</b>                         | Vineet Kumar Sharma, Ph.D.<br>Indian Institute of Science Education and Research Bhopal<br>Bhopal, Madhya Pradesh INDIA                                                                                                                                                                                                                                                                                                                                                                                                                                                                                                                                                                                                                                                                                                                                                                                                                                                                                                                                                                                                                                                                                                                                                                                                                                                                                                                                                                                                                                                                                                                                                                                                                                                                                                                                                                                                                                                                                                                                                                                     |
| <b>Corresponding Author Secondary Information:</b>   |                                                                                                                                                                                                                                                                                                                                                                                                                                                                                                                                                                                                                                                                                                                                                                                                                                                                                                                                                                                                                                                                                                                                                                                                                                                                                                                                                                                                                                                                                                                                                                                                                                                                                                                                                                                                                                                                                                                                                                                                                                                                                                             |
| <b>Corresponding Author's Institution:</b>           | Indian Institute of Science Education and Research Bhopal                                                                                                                                                                                                                                                                                                                                                                                                                                                                                                                                                                                                                                                                                                                                                                                                                                                                                                                                                                                                                                                                                                                                                                                                                                                                                                                                                                                                                                                                                                                                                                                                                                                                                                                                                                                                                                                                                                                                                                                                                                                   |
| <b>Corresponding Author's Secondary Institution:</b> |                                                                                                                                                                                                                                                                                                                                                                                                                                                                                                                                                                                                                                                                                                                                                                                                                                                                                                                                                                                                                                                                                                                                                                                                                                                                                                                                                                                                                                                                                                                                                                                                                                                                                                                                                                                                                                                                                                                                                                                                                                                                                                             |
| <b>First Author:</b>                                 | Darshan B Dhakan                                                                                                                                                                                                                                                                                                                                                                                                                                                                                                                                                                                                                                                                                                                                                                                                                                                                                                                                                                                                                                                                                                                                                                                                                                                                                                                                                                                                                                                                                                                                                                                                                                                                                                                                                                                                                                                                                                                                                                                                                                                                                            |
| <b>First Author Secondary Information:</b>           |                                                                                                                                                                                                                                                                                                                                                                                                                                                                                                                                                                                                                                                                                                                                                                                                                                                                                                                                                                                                                                                                                                                                                                                                                                                                                                                                                                                                                                                                                                                                                                                                                                                                                                                                                                                                                                                                                                                                                                                                                                                                                                             |
| <b>Order of Authors:</b>                             | Darshan B Dhakan                                                                                                                                                                                                                                                                                                                                                                                                                                                                                                                                                                                                                                                                                                                                                                                                                                                                                                                                                                                                                                                                                                                                                                                                                                                                                                                                                                                                                                                                                                                                                                                                                                                                                                                                                                                                                                                                                                                                                                                                                                                                                            |

|                                                |                                                                                                                                                                                                                                                                                                                                                                                                                                                                                                                                                                                                                                                                                                                                                                                                                                                                                                                                                                                                                                                                                                                                                                                                                                                                                                                                                                                                                                                                                                                                                                                                                                                                                                                                                                                                                                                                                                                                                                                                                                                                                                                                                                                                                                                                                                                                                                                                                                                                                                                                                                                                                                                                                                                                                    |
|------------------------------------------------|----------------------------------------------------------------------------------------------------------------------------------------------------------------------------------------------------------------------------------------------------------------------------------------------------------------------------------------------------------------------------------------------------------------------------------------------------------------------------------------------------------------------------------------------------------------------------------------------------------------------------------------------------------------------------------------------------------------------------------------------------------------------------------------------------------------------------------------------------------------------------------------------------------------------------------------------------------------------------------------------------------------------------------------------------------------------------------------------------------------------------------------------------------------------------------------------------------------------------------------------------------------------------------------------------------------------------------------------------------------------------------------------------------------------------------------------------------------------------------------------------------------------------------------------------------------------------------------------------------------------------------------------------------------------------------------------------------------------------------------------------------------------------------------------------------------------------------------------------------------------------------------------------------------------------------------------------------------------------------------------------------------------------------------------------------------------------------------------------------------------------------------------------------------------------------------------------------------------------------------------------------------------------------------------------------------------------------------------------------------------------------------------------------------------------------------------------------------------------------------------------------------------------------------------------------------------------------------------------------------------------------------------------------------------------------------------------------------------------------------------------|
|                                                | Abhijit Maji                                                                                                                                                                                                                                                                                                                                                                                                                                                                                                                                                                                                                                                                                                                                                                                                                                                                                                                                                                                                                                                                                                                                                                                                                                                                                                                                                                                                                                                                                                                                                                                                                                                                                                                                                                                                                                                                                                                                                                                                                                                                                                                                                                                                                                                                                                                                                                                                                                                                                                                                                                                                                                                                                                                                       |
|                                                | Ashok K Sharma                                                                                                                                                                                                                                                                                                                                                                                                                                                                                                                                                                                                                                                                                                                                                                                                                                                                                                                                                                                                                                                                                                                                                                                                                                                                                                                                                                                                                                                                                                                                                                                                                                                                                                                                                                                                                                                                                                                                                                                                                                                                                                                                                                                                                                                                                                                                                                                                                                                                                                                                                                                                                                                                                                                                     |
|                                                | Rituja Saxena                                                                                                                                                                                                                                                                                                                                                                                                                                                                                                                                                                                                                                                                                                                                                                                                                                                                                                                                                                                                                                                                                                                                                                                                                                                                                                                                                                                                                                                                                                                                                                                                                                                                                                                                                                                                                                                                                                                                                                                                                                                                                                                                                                                                                                                                                                                                                                                                                                                                                                                                                                                                                                                                                                                                      |
|                                                | Joby Pulikkan                                                                                                                                                                                                                                                                                                                                                                                                                                                                                                                                                                                                                                                                                                                                                                                                                                                                                                                                                                                                                                                                                                                                                                                                                                                                                                                                                                                                                                                                                                                                                                                                                                                                                                                                                                                                                                                                                                                                                                                                                                                                                                                                                                                                                                                                                                                                                                                                                                                                                                                                                                                                                                                                                                                                      |
|                                                | Tony Grace                                                                                                                                                                                                                                                                                                                                                                                                                                                                                                                                                                                                                                                                                                                                                                                                                                                                                                                                                                                                                                                                                                                                                                                                                                                                                                                                                                                                                                                                                                                                                                                                                                                                                                                                                                                                                                                                                                                                                                                                                                                                                                                                                                                                                                                                                                                                                                                                                                                                                                                                                                                                                                                                                                                                         |
|                                                | Andres Gomez                                                                                                                                                                                                                                                                                                                                                                                                                                                                                                                                                                                                                                                                                                                                                                                                                                                                                                                                                                                                                                                                                                                                                                                                                                                                                                                                                                                                                                                                                                                                                                                                                                                                                                                                                                                                                                                                                                                                                                                                                                                                                                                                                                                                                                                                                                                                                                                                                                                                                                                                                                                                                                                                                                                                       |
|                                                | Joy Scaria                                                                                                                                                                                                                                                                                                                                                                                                                                                                                                                                                                                                                                                                                                                                                                                                                                                                                                                                                                                                                                                                                                                                                                                                                                                                                                                                                                                                                                                                                                                                                                                                                                                                                                                                                                                                                                                                                                                                                                                                                                                                                                                                                                                                                                                                                                                                                                                                                                                                                                                                                                                                                                                                                                                                         |
|                                                | Katherine R Amato                                                                                                                                                                                                                                                                                                                                                                                                                                                                                                                                                                                                                                                                                                                                                                                                                                                                                                                                                                                                                                                                                                                                                                                                                                                                                                                                                                                                                                                                                                                                                                                                                                                                                                                                                                                                                                                                                                                                                                                                                                                                                                                                                                                                                                                                                                                                                                                                                                                                                                                                                                                                                                                                                                                                  |
|                                                | Vineet Kumar Sharma, Ph.D.                                                                                                                                                                                                                                                                                                                                                                                                                                                                                                                                                                                                                                                                                                                                                                                                                                                                                                                                                                                                                                                                                                                                                                                                                                                                                                                                                                                                                                                                                                                                                                                                                                                                                                                                                                                                                                                                                                                                                                                                                                                                                                                                                                                                                                                                                                                                                                                                                                                                                                                                                                                                                                                                                                                         |
| <b>Order of Authors Secondary Information:</b> |                                                                                                                                                                                                                                                                                                                                                                                                                                                                                                                                                                                                                                                                                                                                                                                                                                                                                                                                                                                                                                                                                                                                                                                                                                                                                                                                                                                                                                                                                                                                                                                                                                                                                                                                                                                                                                                                                                                                                                                                                                                                                                                                                                                                                                                                                                                                                                                                                                                                                                                                                                                                                                                                                                                                                    |
| <b>Response to Reviewers:</b>                  | <p>--Reviewer #1</p> <p>--I commend the authors on their openness and responsiveness to the comments from both reviewers. The additional analyses performed and the clarifications in the manuscript have resulted in a much-improved draft. The availability of both the raw amplicon and WGS data in NCBI's Sequence Read Archive is a great service to the scientific community and should ensure open access to this data and its inclusion in future studies. The origin of the samples and the sequencing data is well-documented and cohort sample collection and storage appears to adhere to ethical and technical standards.</p> <p>--More specifically, the updated manuscript addresses and corrects all points that I raised in the first review. These include a major reanalysis of 16S data with an updated database (SILVA December 2017 versus GreenGenes 2013) and an implementation of statistical analysis with normalization performed using DESeq2. They clarify their use of downsized data for Unifrac analysis. Further, the authors now combine their data and run downstream analysis using an "Updated-IGC." This clearly aids their analysis and broadens the appeal of the manuscript as a whole. The 9% of additional genes appears to be unique to the Indian cohort. The authors also performed the suggested enterotype comparisons with the data from Arumugam et al.</p> <p>--Based on this new version of the manuscript, my recommendation is the manuscript can be accepted without further scientific revision. The authors should, nevertheless, have a careful review of the text to address remaining grammatical errors and awkward phrasing. A few, non-exhaustive, examples are given:</p> <p>The changes suggested by reviewers have been highlighted (orange coloured) in the manuscript.</p> <p>Reply: We thank the reviewer for appreciating our efforts and recommending the manuscript for publication. We have carefully read the manuscript for any grammatical errors and have also made all the suggested changes in the manuscript text.</p> <p>--Line 114: Change "All the recruited individuals" to "Recruited individuals"</p> <p>Reply: As per reviewer's suggestion, we have made this change (Line: 114).</p> <p>--Line 216: Should be "relative abundances"</p> <p>Reply: We have corrected these words (Line: 217).</p> <p>--Line 365: "its inward transport in microbial cells by the BCAA transporters" would be better as "its uptake by microbes via BCAA transporters"</p> <p>Reply: We agree with the rephrasing and have revised this sentence as suggested (Line: 369).</p> <p>--Line 408: Change "Though, the sequencing depth in the study was not too high..." to</p> |

"Although sequencing depth was modest....longer paired-ends reads, from the cohort of 110 individuals appears sufficient to provide the first insights on the Indian gut microbiome"

Reply: We have revised the sentence as per the suggestions from both reviewers (Line: 412-415).

--Line 446: "One aspect to this could" could be better written as "One potential explanation could be..."

Reply: We have revised this sentence as per the suggestion (Line: 450)

--Line 486: "has known health benefits..." might be better as "has been reported to be beneficial by preventing...."

Reply: We have revised this sentence as per the reviewer's suggestion (Line: 490).

--Line 505: "are emerging, which results in the increased...." is better as "are emerging, with results showing increased...."

Reply: We have revised this sentence as per the reviewer's suggestion (Line: 509).

In addition, we have also carefully checked the manuscript for any grammatical or phrasing errors and hope that the revised manuscript is much better in reading.

#### Reviewer #2

--The authors have reasonably addressed the comments I raised in the original submission.

Only one general comment and a few minor comments remain, which should all be readily addressable by the authors.

#### General comments:

--L286-291: It would be good to test whether the location and diet are correlated and to which extent. In fact, given the information from the authors, I would expect them to be correlated. Hence, the observed results (Fig. S12) are to be expected and this should be qualified. If no such test is performed, I would recommend to at least reemphasize the (strong) influence of location on the diet of the studied Indian populations. This is also important with respect to the results in L333-335.

The changes suggested by reviewers have been highlighted (orange coloured) in the manuscript

Reply: We thank the reviewer for the suggestion. We have now performed a correlation of location and diet across all samples and observed a high correlation ( $\rho = 0.708$ ; FDR Adj. P-value =  $2 \times 10^{-16}$ ). We have included these results at both places in the revised manuscript (Line: 293-294, 337-338).

#### Minor comments:

--Throughout: Frequently, "the"/"a" is missing, e.g., L158 "analysis of microbiome", L159 "reads from other three datasets", L163 "This shows that the addition of subset".

Reply: As suggested by the Reviewer, we have added the/a in the manuscript. We have also carefully checked and corrected the manuscript for any such errors.

--L149-150 - "and unique to IGC": This reads as if the 943,395 genes are unique to the IGC, but aren't his unique to the newly constructed Indian microbial gene catalogue?

Reply: We agree with the reviewer that these 943,395 genes identified from Indian gut microbiome are unique to Indian microbial gene catalogue and not present in IGC. We have rephrased this sentence for clarity (Line 149-150).

--L161 - "did not show a significant ( $P < 0.01$ )": Not sure if the significance level ( $\alpha = 0.01$ ) is meant here or if the p-value was " $< 0.01$ ". In the latter case, it would be considered significant at  $\alpha = 0.01$ . Please clarify and verify throughout.

Reply: We apologize for this confusion. We have now provided the exact P-values for HMP, MetaHIT and China datasets, and the P-values were not significant for all the three datasets as found using the student's t-test, whereas it was significant for Indian dataset. The P-values are mentioned at all places in the manuscript where the results were significant (Line 155-156, 161-162, 166).

--L212-214: Species names should be italicized.

Reply: We have made this correction (Line: 213-215).

--L270: "be" is missing -> "needs to be collected".

Reply: We have corrected this sentence (Line: 271).

--L275: The text suggests a "significance", yet the p-value is listed as 0.6841. Please clarify.

Reply: We apologize for this confusion. We have removed the word "significance" and have rephrased the sentence for clarity. Here, we observed a high concordance in allocation of samples to clusters using both taxonomic (genus abundance) and functional (KEGG abundance) information. Using Fisher's exact test as suggested by reviewer 2 during the earlier revision, no significant difference was observed in cluster allocation ( $P$ -value = 0.6841) thus showing similarity in clustering of samples using taxonomic and functional information. We have also provided this information of cluster allocation in Additional File 11. (Line: 274-277).

--Supplements: Fig S11 still contains a reference to "enterotypes" which, as suggested by Reviewer 1 (and I agree) should be generally avoided, unless in combination with the non-Indian populations. Please check this throughout.

Reply: We agree with the reviewer and we have replaced the word 'enterotypes' with "clusters" in Additional File 5.

--L304-305: This is not a necessity for the revision, but rather a question out of curiosity: Was an association with age tested here, in addition to BMI?

Reply: We had examined the association of multiple covariates including age and BMI, with taxonomic and functional data. We have provided the details of these associations in Additional File 13 and Additional File 15, which were also provided with the earlier submitted manuscript.

--L317 + L319: What do "19 MGS/CAG" and "67 MGS/CAG" refer to here? Are these the numbers of MGSs/CAGs that were annotated to likely be *P. copri* populations, i.e., multiple strains/sub-species of *P. copri* were identified? Please clarify this.

Reply: Here, we were referring to the total 19 MGS/CAGs found enriched in LOC1, and 67 MGS/CAGs found enriched in LOC2. We have reframed this sentence for clarity (Line: 317-322).

--L339: Did Cluster-2 show \*no\* association with location, i.e., was a mixture of samples from LOC1 and LOC2?

Reply: Cluster-2 did show an association with location. Out of a total of 36 samples assigned to Cluster-2 it included 13 samples from LOC-1 and 23 samples from LOC-2. We have mentioned this in the manuscript (Line: 343-344).

--Legend Fig.S17: "OPLD-DA" -> "OPLS-DA "

Reply: We have corrected this word in the legend of Fig. S17 (Additional File 5).

--Fig.S18: Panel A is rather small and the fonts are hard to read. Please increase the

size of the panel.

Reply: We have now increased the font size of Panel A in Figure S18.

--L409-411: I welcome the qualification of the sequencing depth here. Nevertheless, the argument of 2x150bp sequencing is misleading here. Read-length clearly plays a role, so does the overall sequencing depth. While 2x150bp is commonly used currently, and hence the current study is up-to-date, I would suggest the authors to rephrase this slightly. My suggestion would be: "... deviation), the inclusion of 110 individuals from two distinct geographic locations as well as the identification of Indian gut microbiome-specific genes provide a first insight into the Indian gut microbiome and are thus considered important additions to the field."

Reply: We thank the reviewer for this suggestion, and have revised this text as per the suggestion (Line: 412-415).

--L411-413: This sentence reads contradictory in itself. If there is a high diversity, how can (only) two locations be considered representative? I would suggest to rephrase this.

Reply: We have removed the word 'representative' and have rephrased this sentence (Line: 415-417).

--L431: It is not readily clear what "Its" refers to here. I assume it is "Prevotella", yet this should be clarified.

Reply: Yes, the word 'its' was referring to Prevotella. We have reframed this statement for more clarity (Line: 435).

--L439: Please consider removing "driver" unless you can show a causation rather than the association which was presented in the results.

Reply: As per the suggestion, we have removed the word 'driver' from the sentence (Line: 443).

--L442: "bacteria" -> "bacterium"

Reply: We have corrected this word (Line: 446).

--L470-471: The "statistically sound" is not readily clear here. Please consider removing this as I do not find it relevant in this context.

Reply: As per the reviewer's suggestion, we have revised this sentence and have removed the phrase 'statistically sound' (Line: 474).

--L500: "Firmicute" -> "Firmicutes"

Reply: We have corrected this word (Line: 504).

--L515: Please remove "populations", it does not fit in here.

Reply: We have removed this word (Line: 519).

--L578: Please check correct capitalization.

Reply: We thank the reviewer for pointing it out. We have corrected this word to 'UniFrac' and checked it throughout the manuscript (Line: 582).

--L582: Please be consistent in the numbers: "mean = 1.36 Gb" vs. "1.5" (L408).

Reply: Thanks for pointing out this typo, we have corrected this number in line number 412.

--L585: Consider removing "bacterial" unless there was some enrichment step for

|                                                                                                                                                                                                                                                                                                                                                                                                                                                                                                                                     |                                                                                                                                                     |
|-------------------------------------------------------------------------------------------------------------------------------------------------------------------------------------------------------------------------------------------------------------------------------------------------------------------------------------------------------------------------------------------------------------------------------------------------------------------------------------------------------------------------------------|-----------------------------------------------------------------------------------------------------------------------------------------------------|
|                                                                                                                                                                                                                                                                                                                                                                                                                                                                                                                                     | <p>bacterial DNA.</p> <p>Reply: We thank the reviewer for pointing it out. We have removed the word “bacterial” from this sentence (Line: 589).</p> |
| <b>Additional Information:</b>                                                                                                                                                                                                                                                                                                                                                                                                                                                                                                      |                                                                                                                                                     |
| <b>Question</b>                                                                                                                                                                                                                                                                                                                                                                                                                                                                                                                     | <b>Response</b>                                                                                                                                     |
| Are you submitting this manuscript to a special series or article collection?                                                                                                                                                                                                                                                                                                                                                                                                                                                       | No                                                                                                                                                  |
| <p><b>Experimental design and statistics</b></p> <p>Full details of the experimental design and statistical methods used should be given in the Methods section, as detailed in our <a href="#">Minimum Standards Reporting Checklist</a>. Information essential to interpreting the data presented should be made available in the figure legends.</p> <p>Have you included all the information requested in your manuscript?</p>                                                                                                  | Yes                                                                                                                                                 |
| <p><b>Resources</b></p> <p>A description of all resources used, including antibodies, cell lines, animals and software tools, with enough information to allow them to be uniquely identified, should be included in the Methods section. Authors are strongly encouraged to cite <a href="#">Research Resource Identifiers</a> (RRIDs) for antibodies, model organisms and tools, where possible.</p> <p>Have you included the information requested as detailed in our <a href="#">Minimum Standards Reporting Checklist</a>?</p> | Yes                                                                                                                                                 |
| <p><b>Availability of data and materials</b></p> <p>All datasets and code on which the conclusions of the paper rely must be either included in your submission or deposited in <a href="#">publicly available repositories</a> (where available and ethically appropriate), referencing such data using</p>                                                                                                                                                                                                                        | Yes                                                                                                                                                 |

a unique identifier in the references and in the “Availability of Data and Materials” section of your manuscript.

Have you have met the above requirement as detailed in our [Minimum Standards Reporting Checklist](#)?

[Click here to view linked References](#)

1  
2  
3  
4  
5  
6  
7  
8  
9  
10  
11  
12  
13  
14  
15  
16  
17  
18  
19  
20  
21  
22  
23  
24  
25  
26  
27  
28  
29  
30  
31  
32  
33  
34  
35  
36  
37  
38  
39  
40  
41  
42  
43  
44  
45  
46  
47  
48  
49  
50  
51  
52  
53  
54  
55  
56  
57  
58  
59  
60  
61  
62  
63  
64  
65

1 **Title:** The unique composition of Indian gut microbiome, gene catalogue and associated faecal  
2 metabolome deciphered using multi-omics approaches

3 **Authors:** D.B. Dhakan<sup>1†</sup>, A. Maji<sup>1†</sup>, A.K. Sharma<sup>1</sup>, R. Saxena<sup>1</sup>, J. Pulikkan<sup>2</sup>, T. Grace<sup>2,3</sup>, A.  
4 Gomez<sup>4</sup>, J. Scaria<sup>5</sup>, K.R. Amato<sup>6</sup>, V.K. Sharma<sup>1\*</sup>

5 **Affiliations:** <sup>1</sup>Metagenomics and Systems Biology Laboratory, Department of Biological  
6 Sciences, Indian Institute of Science Education and Research Bhopal, India, <sup>2</sup>Department of  
7 Genomic Science, Central University of Kerala, India, <sup>3</sup>Division of Biology, Kansas State  
8 University USA, <sup>4</sup>Microbiomics Laboratory, Department of Animal Science, University of  
9 Minnesota, USA, <sup>5</sup>Animal Disease Research & Diagnostic Laboratory, Veterinary and Biomedical  
10 Sciences Department, South Dakota State University, USA, <sup>6</sup>Department of Anthropology,  
11 Northwestern University, USA.

12 **Email IDs:** [darshan@iiserb.ac.in](mailto:darshan@iiserb.ac.in), [abhi71084@gmail.com](mailto:abhi71084@gmail.com), [ashoks773@gmail.com](mailto:ashoks773@gmail.com),  
13 [ritus@iiserb.ac.in](mailto:ritus@iiserb.ac.in), [puljobcmi@gmail.com](mailto:puljobcmi@gmail.com), [tonygrace99@gmail.com](mailto:tonygrace99@gmail.com), [gomez@umn.edu](mailto:gomez@umn.edu),  
14 [joy.scaria@sdstate.edu](mailto:joy.scaria@sdstate.edu), [katherine.amato@northwestern.edu](mailto:katherine.amato@northwestern.edu), [vineetks@iiserb.ac.in](mailto:vineetks@iiserb.ac.in)

15 † These authors contributed equally to this work

16 \*Corresponding author

17 V.K. Sharma: [vineetks@iiserb.ac.in](mailto:vineetks@iiserb.ac.in)



1  
2  
3  
4  
5  
6  
7  
8  
9  
10  
11  
12  
13  
14  
15  
16  
17  
18  
19  
20  
21  
22  
23  
24  
25  
26  
27  
28  
29  
30  
31  
32  
33  
34  
35  
36  
37  
38  
39  
40  
41  
42  
43  
44  
45  
46  
47  
48  
49  
50  
51  
52  
53  
54  
55  
56  
57  
58  
59  
60  
61  
62  
63  
64  
65

**19 Abstract**

**20 Background**

21 Metagenomic studies carried out in the past decade have led to an enhanced understanding of the  
22 gut microbiome in human health, however, the Indian gut microbiome is not well explored yet.  
23 We analysed the gut microbiome of 110 healthy individuals from two distinct locations (North-  
24 Central and Southern) in India using multi-omics approaches, including 16S rRNA gene amplicon  
25 sequencing, whole genome shotgun metagenomic sequencing, and metabolomic profiling of faecal  
26 and serum samples.

**27 Results**

28 The gene catalogue established in this study emphasizes the uniqueness of the Indian gut  
29 microbiome in comparison to other populations. The gut microbiome of the cohort from North-  
30 Central India, which was primarily consuming a plant-based diet, was found to be associated with  
31 *Prevotella*, and also showed an enrichment of Branched Chain Amino Acid (BCAA) and  
32 lipopolysaccharide (LPS) biosynthesis pathways. In contrast, the gut microbiome of the cohort  
33 from Southern India, which was consuming an omnivorous diet, showed associations with  
34 *Bacteroides*, *Ruminococcus* and *Faecalibacterium*, and had an enrichment of Short Chain Fatty  
35 Acid (SCFA) biosynthesis pathway and BCAA transporters. This corroborated well with the  
36 metabolomics results, which showed higher concentration of BCAAs in the serum metabolome of  
37 the North-Central cohort and an association with *Prevotella*. In contrast, the concentration of  
38 BCAAs were found higher in the faecal metabolome of the Southern-India cohort, and showed a  
39 positive correlation with the higher abundance of BCAA transporters.

**40 Conclusions**

1  
2  
3  
4  
5  
6  
7  
8  
9  
10  
11  
12  
13  
14  
15  
16  
17  
18  
19  
20  
21  
22  
23  
24  
25  
26  
27  
28  
29  
30  
31  
32  
33  
34  
35  
36  
37  
38  
39  
40  
41  
42  
43  
44  
45  
46  
47  
48  
49  
50  
51  
52  
53  
54  
55  
56  
57  
58  
59  
60  
61  
62  
63  
64  
65

41 The study reveals the unique composition of Indian gut microbiome, establishes the Indian gut  
42 microbial gene catalogue, and compares it with the gut microbiome of other populations. The  
43 functional associations revealed using metagenomic and metabolomic approaches provide novel  
44 insights on the gut-microbe-metabolic axis, which will be useful for future epidemiological and  
45 translational researches.

46  
47 **Keywords:** Indian Gut Microbiome, Whole Genome Shotgun, Metagenomics, Metabolomics,  
48 Integrated Gene Catalog, Metagenome-Wide Association Study, Core gut microbiome, Short  
49 Chain Fatty Acids, Branched Chain Amino Acids

1  
2  
3  
4  
5  
6  
7  
8  
9  
10  
11  
12  
13  
14  
15  
16  
17  
18  
19  
20  
21  
22  
23  
24  
25  
26  
27  
28  
29  
30  
31  
32  
33  
34  
35  
36  
37  
38  
39  
40  
41  
42  
43  
44  
45  
46  
47  
48  
49  
50  
51  
52  
53  
54  
55  
56  
57  
58  
59  
60  
61  
62  
63  
64  
65

52 **Background**

53 Determining the taxonomic and functional composition of a healthy gut microbiome across  
54 different populations is essential for understanding its role in maintaining human health. Several  
55 large-scale, world-wide microbiome projects have revealed variability in the gut microbial  
56 composition of the healthy individuals due to factors such as mode of delivery, age, geographical  
57 location, diet, lifestyle, etc. [1-5]. Majority of the gut microbiome studies have determined  
58 microbial taxonomy and functional diversity using 16S rRNA marker gene-based and/or Whole  
59 Genome Shotgun (WGS) approaches to understand the functional role of the gut microbiome.  
60 However, novel insights on the complex interplay between diet, gut microbes and human health,  
61 along with the role of key microbial metabolites, such as Short Chain Fatty Acids and Branched  
62 Chain Amino Acids, derived from the microbial fermentation of dietary fibres are beginning to  
63 emerge from recent gut metabolomics studies [6, 7]. Moreover, the direct impact of microbial  
64 metabolome on human health is also becoming apparent from the recent studies focusing on the  
65 ‘gut microbiome- host metabolism axis’ [8]. Therefore, an integrative approach using both  
66 metagenome and metabolome-based characterizations of the gut microbiome appears pragmatic  
67 for gaining deeper functional and mechanistic insights into the role of gut microbes on human  
68 health.

69 The large-scale studies carried out so far mainly represent the gut microbiome of urban populations  
70 primarily from Europe, US and other ‘WEIRD’ countries (i.e., the Western, Educated,  
71 Industrialized, Rich, and Democratic countries) [9, 10]. Only recently, some studies have  
72 characterized the human microbiome from diverse ethnic populations and found significant  
73 compositional variations compared to microbiome from other previously studied populations [11-  
74 14]. India is the seventh largest country in the world and harbours the second largest population

1  
2  
3  
4  
5  
6  
7  
8  
9  
10  
11  
12  
13  
14  
15  
16  
17  
18  
19  
20  
21  
22  
23  
24  
25  
26  
27  
28  
29  
30  
31  
32  
33  
34  
35  
36  
37  
38  
39  
40  
41  
42  
43  
44  
45  
46  
47  
48  
49  
50  
51  
52  
53  
54  
55  
56  
57  
58  
59  
60  
61  
62  
63  
64  
65

75 spread across multiple geographical locations with enormous diversity in ethnicity, lifestyles and  
76 dietary habits. India is a home to the majority of world's vegetarian population but also has an  
77 almost equal representation of population consuming animal-based diets. The Indian population  
78 also has the highest prevalence of diabetes in the world [15]. According to the World Health  
79 Organization estimates (WHO, 2011), 53% of deaths in India in the year 2008 were attributed to  
80 metabolic conditions such as diabetes and cardiovascular diseases, which are predicted to reach  
81 ~75% by 2030 [16].

82 A few studies have investigated the gut microbiome of the Indian population. A recent study by  
83 Maji et al. has shown the functional association of human gut microbiome dysbiosis with  
84 tuberculosis through a time-course study carried on six tuberculosis patients in India [17].  
85 However, other gut microbiome studies were mainly limited by small cohort sizes and amplicon-  
86 based (16S rRNA gene) sequencing and analysis [17-21]. Thus, several large-scale efforts are  
87 needed to identify the Indian population-specific microbiome biomarkers, and to understand the  
88 impact of gut microbiome on health and disease in the Indian population along with global  
89 comparisons.

90 However, to uncover the enormous gut microbiome diversity inherent in the different sub-  
91 populations of India, extensive sampling and analyses are required. Therefore, as the first large-  
92 scale study from India, we selected two prominent locations in North-Central India, i.e. LOC1:  
93 Bhopal city, Madhya Pradesh, and Southern India, i.e. LOC2: Kerala. The two locations also had  
94 different dietary habits. The Southern-India (LOC2) diet consisted of rice, meat and fish, whereas  
95 the North-Central (LOC1) diet consisted of carbohydrate-rich food including plant-derived  
96 products, wheat and trans-fat food (high-fat dairy, sweets and fried snacks). The 'Human  
97 Development Index Report, UNDP' (United Nations Development Programme), India and SRS-

1  
2  
3  
4  
5  
6  
7  
8  
9  
10  
11  
12  
13  
14  
15  
16  
17  
18  
19  
20  
21  
22  
23  
24  
25  
26  
27  
28  
29  
30  
31  
32  
33  
34  
35  
36  
37  
38  
39  
40  
41  
42  
43  
44  
45  
46  
47  
48  
49  
50  
51  
52  
53  
54  
55  
56  
57  
58  
59  
60  
61  
62  
63  
64  
65

98 based life-table (Sample Registration Survey, 2010-14) has revealed that the citizens from Kerala  
99 had the highest life-expectancy rates (>74 years) in India, whereas those in Madhya Pradesh  
100 (capital city ‘Bhopal’) exhibited the lowest (<65 years) [22]. Further, a higher predisposition of  
101 the North-Indian population towards diabetes, cardiovascular diseases and hypertension is also  
102 known, which in contrast is much lower in Southern India, perhaps due to the lifestyle differences  
103 in the two regions [15, 23]. Thus, to gain deeper functional insights into the microbiome from these  
104 two distinct sub-populations of India, a multi-omics approach was carried out using amplicon-  
105 based profiling of taxonomic composition (16S rRNA gene sequencing), whole genome shotgun-  
106 based (WGS-based) profiling of metagenome, and GC-MS-based profiling of faecal and serum  
107 metabolomic signatures.

108 **Data Description**

109 The two selected locations, Bhopal (LOC1) and Kerala (LOC2) from North-Central and Southern  
110 parts of India were about 2,000 kms apart and provided a distinct representation of the Indian  
111 population with respect to diet and lifestyle (**Additional File 1**). The 110 (62 females, 58 males)  
112 individuals recruited in this study were not suffering from any disease as reported by personal  
113 medical history and physical examination, and confirmed no exposure to antibiotics for at least  
114 one month prior to sampling. Recruited individuals had an average BMI of 21.16 ( $\pm 5.23$  standard  
115 deviation), an average age of 29.72 ( $\pm 17.41$  standard deviation) and were not diagnosed with any  
116 disease at the time of sample collection, and thus were considered as ‘healthy’ (**Additional File**  
117 **1**). Moreover, they did not have a second-degree relative history of T2D. The recruitment of  
118 volunteers, sample collection, and other study-related procedures were carried out by following  
119 the guidelines and protocols approved by the Institute Ethics Committee of Indian Institute of  
120 Science Education and Research (IISER), Bhopal, India. The faecal samples were frozen within

1  
2  
3  
4  
5  
6  
7  
8  
9  
10  
11  
12  
13  
14  
15  
16  
17  
18  
19  
20  
21  
22  
23  
24  
25  
26  
27  
28  
29  
30  
31  
32  
33  
34  
35  
36  
37  
38  
39  
40  
41  
42  
43  
44  
45  
46  
47  
48  
49  
50  
51  
52  
53  
54  
55  
56  
57  
58  
59  
60  
61  
62  
63  
64  
65

121 30 mins of collection and were then used for 16S rRNA gene V3 hypervariable region amplicon  
122 sequencing, WGS-based metagenomic sequencing, and metabolomic analysis. Further, the serum  
123 samples collected from a subset of volunteers were used for GC-MS based metabolomics analysis.  
124 The sequencing of V3 hypervariable region of 16S rRNA gene and shotgun metagenome  
125 sequencing from the 110 faecal samples resulted into 54.87 million paired-end reads ( $503,460 \pm$   
126  $175,547$  (mean  $\pm$  standard deviation) reads/sample) and 499.98 million paired-end reads  
127 ( $4,545,280 \pm 1,498,663$  (mean  $\pm$  standard deviation) reads/sample), respectively (Methods,  
128 **Additional File 2** and **Additional File 3**). The metabolomic analysis was also performed on all  
129 faecal and subset of serum samples collected from the same healthy participants using GC-MS,  
130 and the resultant CDF files were used for further analysis. The data description of participants and  
131 the data generated from each sample is provided in **Additional File 1** under the Metadata  
132 information section.

## 133 **Analyses**

### 134 **Construction of an Indian gut microbial gene catalogue and updated integrated gene** 135 **catalogue (IGC)**

136 The first step for functional analysis was the construction of an extensive catalogue of gut  
137 microbial genes from the Indian population, which was not available previously. A De Bruijn  
138 graph-based assembly of reads resulted in 2,165,507 contigs of length  $\geq 500$  bp with a total contig  
139 size of 3.086 Gbp representing 68.25% of total reads and a mean N50 value of 2,288 bp. To obtain  
140 assemblies of low coverage genomic regions or genomes present in the Indian gut microbiome,  
141 the reads from each sample were mapped on assembled contigs obtained from their respective  
142 sample, and the remaining singletons (unassembled reads) were pooled and re-assembled together

1  
2  
3  
4 143 into additional 45,839 contigs with length  $\geq 500$  bp and a total assembled length of 34.68 Mbp. A  
5  
6  
7 144 total of 1,551,581 non-redundant genes were predicted from contigs, which represent the gut  
8  
9 145 microbial gene catalogue of the Indian cohorts.

10  
11  
12 146 The integrated gene catalogue (IGC) established by Li et al. in a previous multicohort study  
13  
14  
15 147 consisted of 9,879,896 genes identified from 1,267 gut metagenomes representing multiple  
16  
17 148 populations [24]. A total of 943,395 genes (sharing  $< 90\%$  identity with IGC) out of 1,551,581  
18  
19  
20 149 from Indian gut microbial gene catalogue were identified as unique to the Indian microbial gene  
21  
22 150 catalogue. The IGC was updated to construct an ‘Updated-IGC’ by adding these 943,395 non-  
23  
24  
25 151 redundant genes from the Indian gene catalogue. The updated-IGC consisting of 10,823,291 non-  
26  
27 152 redundant genes (an 8.8% increase from IGC) was used as the reference gene catalogue for the  
28  
29  
30 153 subsequent analysis performed in this study. A total of 70.74% ( $\pm 3.77\%$  standard deviation)  
31  
32 154 mapping coverage of reads ( $\sim 7.5\%$  increase in the mapping of reads) was observed from the 110  
33  
34  
35 155 Indian samples on the updated-IGC as compared to 63% ( $\pm 4.61\%$  standard deviation) on IGC,  
36  
37 156 showing a significant (FDR Adj. P-value =  $10^{-16}$ ; Student’s t-test) increase in mapping of Indian  
38  
39 157 microbial dataset (**Fig. 1A** and **Additional File 4**). The datasets from populations of USA (HMP),  
40  
41  
42 158 Denmark (MetaHIT) and China (a study from Qin et al.) mentioned in **Table 1** were used for a  
43  
44 159 comparative analysis of the microbiome of Indian population with other populations [7, 10, 25].  
45  
46  
47 160 The mapping of reads from these three datasets (HMP, MetaHIT and China) on updated-IGC  
48  
49 161 (mean mapping coverage: HMP = 67.74%, China = 77.44% and MetaHIT = 75.21%) did not show  
50  
51  
52 162 a significant (P-values: HMP=0.5, MetaHIT=0.85 and China = 0.17; Student’s t-test) increment  
53  
54 163 from their mapping coverage on IGC (mean mapping coverage: HMP (USA) = 66.93%, China =  
55  
56 164 77.37% and MetaHIT (Denmark) = 75.02%) as observed in **Fig. 1A**. This shows that the addition  
57  
58  
59 165 of a subset of non-redundant genes (sharing  $< 90\%$  identity with IGC) from the Indian gut  
60  
61  
62  
63  
64  
65

1  
2  
3  
4 166 microbiome to the IGC significantly increased (FDR Adj. P-value =  $10^{-16}$ ; Student's t-test) the  
5  
6 167 mapping percentage of reads from Indian microbiome dataset as compared to the other datasets.  
7  
8  
9

## 10 168 **Identification of taxonomic signatures of Indian gut microbiome**

11  
12 169 To determine the taxonomic and functional composition of the Indian gut microbiome and to  
13  
14  
15 170 identify Indian-specific gut-microbial signatures, a cross-population comparison was carried out  
16  
17  
18 171 using the 16S rRNA gene hypervariable region and shotgun metagenomic data from the other  
19  
20 172 populations. A reference-independent metagenome-wide association study (MGWAS) was carried  
21  
22 173 out to identify the Indian-specific gut metagenomic markers through a comparison with similar  
23  
24  
25 174 large-scale studies from other populations [26]. The genes from the metagenomic samples of four  
26  
27 175 countries (India, China, USA and Denmark) were clustered (see Methods) into 924 clusters based  
28  
29  
30 176 on their co-occurrence and Pearson correlations ( $\rho \geq 0.9$ ) across samples resulting into 335 MGS  
31  
32 177 (metagenomic species) having  $\geq 700$  genes in each cluster, and 589 CAGs (co-abundance gene  
33  
34  
35 178 groups) consisting of  $\geq 100$  genes in each cluster. Out of the 924 metagenomic clusters, 195 could  
36  
37 179 be assigned up to species level using the taxonomic assignment strategy described in Methods.  
38  
39 180 Canberra distances were calculated from MGS/CAG abundance profiles and their Principal  
40  
41  
42 181 Component Analysis (PCA) was carried out using 'countries' as factors for explaining the variance  
43  
44 182 between samples, which showed that the Indian population formed a distinct cluster from the other  
45  
46  
47 183 populations in PCA (**Fig. 1B**). It is interesting to note that the samples from the Indian cohort were  
48  
49 184 more widely spread owing to the higher inter-sample Canberra distances between Indian samples  
50  
51 185 (mean = 0.689) as compared to other datasets having average inter-sample distances of 0.61, 0.59  
52  
53  
54 186 and 0.54 for USA, China and Denmark populations, respectively (**Additional File 5: Figure S1**).  
55  
56 187 This could be attributed to the significant (FDR Adj. P-value = 0.00013) differences in MGS  
57  
58  
59  
60  
61  
62  
63  
64  
65



1  
2  
3  
4 188 abundance profiles between LOC1 and LOC2 populations as revealed on comparison of their  
5  
6 189 principal coordinates (**Additional File 5: Figure S2**).

7  
8  
9  
10 190 Further, the identification of enriched metagenomic species (MGS) from P-values calculated using  
11  
12 191 negative binomial (NB) model-based Wald test (implemented in DESeq2) and Log Odds Ratio  
13  
14 192 showed that the species belonging to the genera *Bacteroides*, *Alistipes*, *Clostridium*, and  
15  
16 193 *Ruminococcus* were depleted in the Indian population (China, Denmark and USA; Log Odds Ratio  
17  
18 < -2 and Adj. P-value <0.01), whereas the MGS/CAGs annotated as *Prevotella*, *Mitsuokella*,  
19  
20 194 *Dialister*, *Megasphaera*, and *Lactobacillus* were found to be associated with the Indian population  
21  
22 195 (Adj. P-value < 0.01; Log Odds Ratio > 2), and were the major drivers for separation of Indian  
23  
24 196 samples from other populations (**Additional File 5: Figure S3; Additional File 6**). Furthermore,  
25  
26 197 the distribution of microbial families across ten different populations was also calculated using  
27  
28 198 16S rRNA gene markers, which revealed Indian gut microbiome to have the highest abundance of  
29  
30 199 Prevotellaceae (**Fig. 1C**). The feature selection method applied using random forest along with  
31  
32 200 pairwise Wilcoxon rank-sum test also identified Prevotellaceae to be significantly higher (FDR  
33  
34 201 Adj. P < 0.05) in gut microbiome of Indian cohort compared to the other population datasets except  
35  
36 202 Indonesia (P-value = 0.506) (**Additional File 5; Figure S4, S5 and S6**) where a comparable  
37  
38 203 abundance of Prevotellaceae was present. The high abundance of Prevotellaceae in Indian  
39  
40 204 population underscores its importance as the marker taxa for the Indian cohort.  
41  
42  
43  
44  
45  
46  
47  
48  
49

### 50 206 **Microbial functions enriched in the Indian population**

51  
52 207 Functional comparison of Indian microbiome with other populations was carried out by mapping  
53  
54 208 the genes derived from assembled contigs to the EggNOG database. In total 69,386 EggNOG  
55  
56 209 functions were identified from the Indian gut microbiome, including 2,328 novel functions  
57  
58 210 obtained from clustering the unmapped genes (see Methods). The core microbial functions that are  
59  
60  
61  
62  
63  
64  
65

1  
2  
3  
4  
5  
6  
7  
8  
9  
10  
11  
12  
13  
14  
15  
16  
17  
18  
19  
20  
21  
22  
23  
24  
25  
26  
27  
28  
29  
30  
31  
32  
33  
34  
35  
36  
37  
38  
39  
40  
41  
42  
43  
44  
45  
46  
47  
48  
49  
50  
51  
52  
53  
54  
55  
56  
57  
58  
59  
60  
61  
62  
63  
64  
65

211 essential for microbial survival and present in almost 80% individuals were used for the functional  
212 comparison. The core microbiome was derived using a similar strategy as employed in MetaHIT  
213 (see Methods) [25]. A set of 1,890 essential genes from six bacterial species namely, *Escherichia*  
214 *coli* MG1655I and MG165II, *Bacteroides thetaiotaomicron* VPI-5482, *Pseudomonas* PA01,  
215 *Salmonella enteric* serovar *Typhi* and *Staphylococcus aureus* NCTC 8325 were obtained and were  
216 assigned with eggNOG annotations. The eggNOG abundance profile generated from relative  
217 abundances of genes observed in Indian and other population dataset were ranked based on their  
218 mean abundance in descending order. The range of eggNOGs that included 85% of the 1,890  
219 essential genes were considered as a part of the core microbial eggNOG set for each population  
220 dataset and was used for the analysis. Most of the essential genes were included in the top-ranking  
221 clusters suggesting that the essential genes are present in higher abundance than the accessory  
222 function genes (**Additional File 5: Figure S7**).

223 The core microbiome of Indian samples was compared with the core microbiome of USA, China  
224 and Denmark populations. The proportion of essential genes covered by top-ranking eggNOG  
225 clusters showed that 85% of the essential genes could be covered in the least number (15,300) of  
226 eggNOGs in the case of Indian population, whereas it was covered by a higher (30,900) number  
227 of eggNOGs in the case of USA (20,400), China (19,900) and Denmark populations (**Additional**  
228 **File 5: Figure S8**). These observations suggest that the core functional microbiome of Indian  
229 population is less diverse than the other populations. This corroborates well with the alpha  
230 diversity (mean Shannon index) calculated using gene abundance tables rarefied at 1,000,000  
231 seqs/sample (for n=30 random iterations), which also showed that the Indian microbiome is  
232 significantly (P-value < 10<sup>-16</sup>) less diverse than the microbiome of the other populations analysed  
233 in this study (**Additional File 5: Figure S9**).

1  
2  
3  
4  
5  
6  
7  
8  
9  
10  
11  
12  
13  
14  
15  
16  
17  
18  
19  
20  
21  
22  
23  
24  
25  
26  
27  
28  
29  
30  
31  
32  
33  
34  
35  
36  
37  
38  
39  
40  
41  
42  
43  
44  
45  
46  
47  
48  
49  
50  
51  
52  
53  
54  
55  
56  
57  
58  
59  
60  
61  
62  
63  
64  
65

234 In total, 5,588 eggNOGs were characterized as core functions commonly present in the core  
235 microbiome of all the four population datasets. The co-inertia (Procrustes) analysis and the  
236 eigenvalues calculated from PCA using both core and accessory functions also showed that the  
237 Indian gut microbiome was significantly (FDR Adj. P-value =  $6.4 \times 10^{-10}$ ,  $2 \times 10^{-16}$  and 0.05 with  
238 China, Denmark and USA, respectively for PC1) different from the other datasets (**Fig. 2A & B**).  
239 These results also show the uniqueness of Indian gut microbial functions in composition and  
240 diversity at both core and accessory levels. The Indian gut microbiome was found to be enriched  
241 (FDR Adj.  $P < 0.05$ , Log Odds Ratio  $> 1.5$ ) in functions for carbohydrate and energy metabolism  
242 including degradation of complex polysaccharides and glycogen and was also enriched for  
243 enzymes from TCA cycle, which corroborates well with the carbohydrate-rich diet of the Indian  
244 population (**Fig. 2C and 2D and Additional File 7: Enriched KO and EggNOG functions**).

245 **Unsupervised clustering of Indian samples and their association with previously identified**  
246 **enterotypes**

247 A study by Arumugam et al. classified the samples from multiple populations into clusters based  
248 on genus level profiles, and identified three prominent clusters called enterotypes [2]. In order to  
249 identify the enterotypes from Indian gut microbiome, a meta-analysis was performed using genus  
250 level abundances of samples from the four nations as used by Arumugam et al. along with the  
251 Indian cohort. There were three prominent clusters observed with majority (63.6%) of Indian  
252 population falling into enterotype-2, which was primarily driven by *Prevotella*. The analysis  
253 revealed differences in the distribution of samples from LOC1 and LOC2, where a higher number  
254 of samples from LOC1 (73.5%) were associated with enterotype-2 compared to LOC2 (54%). In  
255 contrast, LOC2 samples were associated with enterotype-1 (30.3%) and enterotype-3 (16.07%),  
256 which were driven by *Bacteroides* and *Ruminococcus*, respectively (**Fig. 3A; Additional File 8**).

1  
2  
3  
4 257 An independent microbial abundance-based clustering of Indian samples using Jensen Shannon  
5  
6 258 distances revealed two prominent clusters. The clustering was validated using Calinski Harabasz  
7  
8  
9 259 index (CHI) and prediction strength, which uses a cross-validation approach to validate the  
10  
11 260 robustness of clustering (**Additional File 9**). Cluster 1 was primarily enriched in species from  
12  
13  
14 261 genus *Prevotella* ( $P < 10^{-10}$ ), and Cluster 2 was quite widely spread and was enriched in species  
15  
16 262 belonging to *Bifidobacterium* ( $P = 10^{-13}$ ), *Ruminococcus* ( $P = 0.031$ ), *Clostridium* ( $P = 0.04$ ) and  
17  
18  
19 263 *Faecalibacterium* ( $P = 0.046$ ) (**Additional File 5: Figure S10, Additional File 10**). The higher  
20  
21 264 abundance of *Prevotella* in LOC1 and *Bacteroides* in LOC2 in India are perhaps due to the  
22  
23  
24 265 different dietary habits of the two locations. The LOC1 population was mainly consuming a  
25  
26 266 carbohydrate-rich diet comprising of vegetable-based foods and grains, whereas the LOC2  
27  
28  
29 267 population was consuming a diet consisting of rice, meat and fish. Similar variations in  
30  
31 268 microbiome diversity due to differences in dietary habits have also been observed in earlier studies  
32  
33  
34 269 [27, 28]. However, to confirm the above observations and to assess the quantitative effect of dietary  
35  
36 270 habits on microbial variations, further longitudinal studies are necessary where detailed dietary  
37  
38 271 information needs to be collected through a food-frequency questionnaire.

40  
41 272 A similar cluster analysis performed using functional information derived from the abundance of  
42  
43 273 KEGG Orthologs (KO) also showed the clustering of samples into two distinct clusters, namely  
44  
45  
46 274 C1 and C2 (**Additional File 5: Figure S11**). In comparison to clusters derived from taxonomic  
47  
48 275 information, only 14 out of 110 samples were placed in different clusters using the functional  
49  
50  
51 276 information showing a similarity ( $P\text{-value} = 0.6841$ ; Fisher's exact test; **Additional File 11**) in  
52  
53 277 cluster allocation using both taxonomic and functional information. C1 was found enriched in  
54  
55 278 genes coding for enzymes such as  $\beta$ -glucosidase ( $\text{LOR} = 3.364$ ;  $P\text{-value} = 10^{-20}$ ), and  $\alpha$ -fucosidase  
56  
57  
58 279 ( $\text{LOR} = 0.73$ ;  $P = 10^{-8}$ ), which are involved in the breakdown of plant-polysaccharides, whereas the  
59  
60  
61  
62  
63  
64  
65

1  
2  
3  
4  
5  
6  
7  
8  
9  
10  
11  
12  
13  
14  
15  
16  
17  
18  
19  
20  
21  
22  
23  
24  
25  
26  
27  
28  
29  
30  
31  
32  
33  
34  
35  
36  
37  
38  
39  
40  
41  
42  
43  
44  
45  
46  
47  
48  
49  
50  
51  
52  
53  
54  
55  
56  
57  
58  
59  
60  
61  
62  
63  
64  
65

280 genes coding for enzymes such as lipase (LOR = -1.34; P=10<sup>-12</sup>), carnitine-coA dehydratase (LOR  
281 = -1.81; P-value = 0.029) and amino peptidase (LOR = -2.72; P=10<sup>-10</sup>), which are involved in the  
282 metabolism of animal-based diet, were enriched in C2 (FDR Adj. P<0.05) (**Additional File 12**).

283 To identify the covariates explaining the maximum variations in microbial profiles across samples,  
284 unweighted UniFrac distances were calculated using phylogenetic distances between OTU  
285 reference sequences and OTU table rarefied at 100,000 seqs/sample. The principal component  
286 analysis of UniFrac distances and the correlation of loadings for each sample with the covariates  
287 using polyserial/biserial correlation identified distinct locations (LOC1 and LOC2) and diet  
288 (vegetarian and omnivorous) to be the major covariates explaining the variation in taxonomic  
289 diversity between the samples (**Additional File 5: Figure S12, Additional File 13**). An ordination  
290 of 110 Indian samples using gene abundance profiles from metagenomic data showed location and  
291 diet to be significantly (FDR Adj. P-value < 0.01; Polyserial Correlation) associated with PC1  
292 explaining the maximum variation between samples (**Additional File 5: Figure S13, Additional**  
293 **File 13**). A significant correlation ( $\rho = 0.708$ ; P-value=2x10<sup>-16</sup> Spearman's rank correlation) was  
294 also observed between location and diet covariates. A comparison of functional diversity using  
295 gene abundance curves with increasing number of samples performed between the two locations  
296 showed that the microbiome profiles of LOC2 populations were more diverse in their composition  
297 compared to LOC1 populations (**Additional File 5: Figure S14**). The inter-individual Bray-curtis  
298 distances calculated on normalized gene abundance profiles between LOC1 and LOC2 populations  
299 also showed significant differences (FDR Adj. P<0.05), where LOC2 population displayed higher  
300 inter-individual heterogeneity in their microbial community structure as compared to LOC1  
301 population (**Additional File5: Figure S15**).

1  
2  
3  
4  
5  
6  
7  
8  
9  
10  
11  
12  
13  
14  
15  
16  
17  
18  
19  
20  
21  
22  
23  
24  
25  
26  
27  
28  
29  
30  
31  
32  
33  
34  
35  
36  
37  
38  
39  
40  
41  
42  
43  
44  
45  
46  
47  
48  
49  
50  
51  
52  
53  
54  
55  
56  
57  
58  
59  
60  
61  
62  
63  
64  
65

302 Major differences in the microbiome profiles were apparent at the Phylum level (using 16S rRNA  
303 gene amplicon sequencing) from the higher Bacteroidetes to Firmicutes ratio (P=0.002) in LOC1  
304 (1.93) compared to LOC2 (0.86), which have been previously reported as a result of differences  
305 in dietary habits, i.e. vegetarian or plant-based (carbohydrate-rich) vs. omnivore or animal-based  
306 (protein-rich) diets (**Additional File 5: Figure S16**) [29, 30]. Notably, these variations were not  
307 attributable to BMI (Spearman's Rank correlation, FDR Adj. P=0.78). Taxonomic profiles  
308 generated from metagenomic datasets through reads mapped to reference genomes were compared  
309 between the two locations at genus and species level using NB model-based Wald test  
310 implemented in DESeq2. *Prevotella* and *Megasphaera* were observed to be higher in LOC1,  
311 whereas *Ruminococcus* and *Faecalibacterium* were higher in LOC2 (FDR Adj. P<0.05, Wilcoxon  
312 rank-sum test); (**Fig. 3B**). Within these genera, *P. copri*, *P. stercorea* species were significantly  
313 higher in LOC1, whereas *F. prausnitzii* and *R. bromii* belonging to genus *Faecalibacterium* and  
314 *Ruminococcus*, respectively were higher in LOC2. In addition, *Akkermansia muciniphila*,  
315 *Eubacterium siraeum* and *Roseburia hominis* were observed higher in LOC2, and *M. funiformis*  
316 and *M. hypermegale* from genus *Megamonas* were higher in LOC1 (**Fig. 3C**). Moreover, the  
317 metagenomic species derived from clustering of gene profiles showed that a total of 19  
318 MGS/CAGs were enriched in LOC1 (Log Odds Ratio > 2; Adj. P<0.05), of which 7 MGS/CAGs  
319 were annotated to *Prevotella copri*. Similarly, 67 MGS/CAGs were found enriched in LOC2 (Adj.  
320 P<0.05; Log Odds Ratio < -2) and included 8 and 3 MGS/CAGs annotated to SCFA producing  
321 species *Faecalibacterium prausnitzii* and *Roseburia inulinivorans*, respectively (**Additional File**  
322 **14**). Interestingly, both, *F. prausnitzii* and *R. inulinivorans*, species enriched in LOC2 are known  
323 SCFA producers, and are regarded as commensals with anti-inflammatory properties [31]. In

1  
2  
3  
4 324 contrast, *Prevotella*, which was abundant in the LOC1, is known to be associated with fibre-rich  
5  
6 325 diet [32].  
7  
8  
9

## 10 326 **Defining the Indian gut metabolome**

11  
12  
13

14 327 The analysis of microbial community structure and functions from the two locations having  
15  
16 328 different lifestyle and diet revealed significant insights. Previous studies have shown a direct role  
17  
18 329 of diet in shaping the different gut microbiomes [33]. Thus, to gain deeper insights into the  
19  
20 330 metabolic activity of microbiomes from LOC1 and LOC2 as driven by different diets, faecal  
21  
22 331 metabolites were analysed using a GC-MS-based metabolomics approach. An unsupervised  
23  
24 332 between class analysis of metabolomic profiles separated the samples into three separate clusters,  
25  
26 333 and the robustness was confirmed using prediction strength and Silhouette index (**Fig. 4A and**  
27  
28 334 **4B**). Polyserial correlation of covariates showed location to be the major factor explaining the  
29  
30 335 variation at PC1 (FDR Adj.  $P < 0.01$ ) separating Cluster 1 from Cluster 2 and 3. In contrast,  
31  
32 336 vegetarian and omnivorous diet groups emerged as other factors explaining the variation at PC2  
33  
34 337 (FDR Adj.  $P < 0.01$ ), and separating Cluster-2 from 3 (**Additional File 15**). The covariates location  
35  
36 338 and diet were also observed to be highly correlated variables showing their strong influence on gut  
37  
38 339 microbiome. Cluster-1 was associated with LOC1 and showed higher concentration of saturated  
39  
40 340 fatty acids including palmitic acid, stearic acid, and valeric acid. Cluster-3 was associated with  
41  
42 341 LOC2 and showed higher abundances of BCAAs, valine, leucine and isoleucine, and SCFAs,  
43  
44 342 propionate and butyrate concentrations. Cluster-2 was enriched in D-glucose, galactose, mannose,  
45  
46 343 lauric acid and cadaverine (a polyamine associated with meat consumption) and was also observed  
47  
48 344 to be associated with LOC2 [34]. To assess the effect of different covariates on the separation of  
49  
50 345 samples, PERMANOVA was performed (**Table 2**). The location was found to explain maximum  
51  
52 346 variation for separation of samples, whereas diet was the second most important variable in  
53  
54  
55  
56  
57  
58  
59  
60  
61  
62  
63  
64  
65

1  
2  
3  
4  
5  
6  
7  
8  
9  
10  
11  
12  
13  
14  
15  
16  
17  
18  
19  
20  
21  
22  
23  
24  
25  
26  
27  
28  
29  
30  
31  
32  
33  
34  
35  
36  
37  
38  
39  
40  
41  
42  
43  
44  
45  
46  
47  
48  
49  
50  
51  
52  
53  
54  
55  
56  
57  
58  
59  
60  
61  
62  
63  
64  
65

347 explaining the variance. The OPLS-DA model was used to expose the class separation for each of  
348 the covariates using  $Q^2$  values which assesses the quality measurement (**Table 3**). The OPLS-DA  
349 models validated by random permutation (n=200) of class labels showed  $Q^2$  values for location  
350 and diet to be higher than  $Q^2$  values produced from random permutations with location showing  
351 highest  $Q^2$  values (**Additional File 5: Figure S17**). The OPLS-DA model also showed clear  
352 separation of samples between locations as class of separation (**Fig. 4C**).

**Positive correlation of BCAA transporters with BCAA levels in faecal metabolome**

354 We also identified the marker metabolites, which showed significant (Spearman's correlation,  
355 FDR Adj.  $P < 0.05$ ) associations with LOC1 or LOC2. In total, 17 metabolite clusters were  
356 identified, of which nine were associated with LOC1, and eight were associated with LOC2  
357 (**Additional File 16**). These marker metabolites showed a positive association with MGS/CAGs.  
358 For instance, *Prevotella* annotated clusters correlated significantly with valeric acid and  
359 sedoheptulose metabolite markers, which showed a higher relative abundance in LOC1. In  
360 contrast, MGS/CAGs belonging to *Faecalibacterium*, *Clostridium*, *Ruminococcus*, and *Alistipes*  
361 were positively associated with BCAAs, cadaverine, propanoate and lauric acid in LOC2 (**Fig.**  
362 **5A**). In addition to the positive association of BCAAs with species enriched in LOC2, a correlation  
363 analysis of significantly different (FDR Adj.  $P < 0.05$ , DESeq2-based Wald test; **Additional File**  
364 **17**) functional modules revealed that faecal BCAA abundances were positively correlated with  
365 BCAA transporter abundance in LOC2. In contrast, BCAA abundance in the faecal metabolome  
366 showed a negative correlation ( $P < 0.05$ ) with BCAA biosynthesis pathways (**Fig. 5B**).

367 The above observations are significant given that BCAAs are important metabolites involved in  
368 glucose homeostasis by stimulating insulin secretion [35]. Higher BCAA levels in the faecal  
369 samples could be a result of its uptake by microbes via BCAA transporters, leading to their



1  
2  
3  
4 370 accumulation in the microbial cells detected in faecal metabolome. This is concordant with higher  
5  
6 371 relative abundance of *Bacteroides vulgatus* and *Eubacterium sireaeum* in LOC2 compared to  
7  
8  
9 372 LOC1, which are known to harbour higher abundance of BCAA transporters (**Fig.3C**) [8]. Further  
10  
11 373 support for this hypothesis emerged from the correlation of circulating BCAA levels (valine and  
12  
13 374 isoleucine) in serum with the corresponding concentrations in faeces. Interestingly, serum BCAA  
14  
15  
16 375 concentrations were significantly higher in LOC1 individuals as compared to LOC2 individuals,  
17  
18  
19 376 which is in contrast with their BCAA levels in the faecal metabolome (**Fig. 6A**). Thus, one  
20  
21 377 possibility is that the accumulation of BCAA in the faeces of individuals of LOC2 was mediated  
22  
23  
24 378 by the inward transport of BCAA by the gut bacteria. In contrast, the lower BCAA accumulation  
25  
26 379 in gut microbes and a higher BCAA biosynthesis by microbial species and its eventual absorption  
27  
28  
29 380 in serum appears to be a plausible reason for the higher BCAA concentrations in serum of LOC1  
30  
31 381 population.

### 32 33 34 382 **Role of *Prevotella copri* in the regulation of BCAA levels**

35  
36  
37 383 To explore the differences in association of functional pathway modules between the two  
38  
39 384 locations, KOs within each module were correlated with KOs from other modules using  
40  
41  
42 385 Spearman's correlation coefficient. The KOs showing significant differences in correlations  
43  
44 386 between LOC1 and LOC2 were identified. This differential correlation analysis of BCAA  
45  
46  
47 387 biosynthetic modules with other pathways in LOC1 and LOC2 revealed that BCAA modules were  
48  
49 388 independently driven in LOC1 and LOC2 (Spearman's rank correlation, FDR Adj.  $P < 0.01$ )  
50  
51 389 (**Additional File 5: Figure S18A & B**). To identify the species and the metabolic pathways that  
52  
53  
54 390 contributed most to the BCAA abundance in faecal and serum metabolome profiles, a correlation  
55  
56 391 analysis with iterations leaving each species out was performed for each metabolic module (**Figure**  
57  
58  
59 392 **6B**). The species whose removal leads to a maximum change in the correlation of metabolic  
60  
61  
62  
63  
64  
65

1  
2  
3  
4  
5  
6  
7  
8  
9  
10  
11  
12  
13  
14  
15  
16  
17  
18  
19  
20  
21  
22  
23  
24  
25  
26  
27  
28  
29  
30  
31  
32  
33  
34  
35  
36  
37  
38  
39  
40  
41  
42  
43  
44  
45  
46  
47  
48  
49  
50  
51  
52  
53  
54  
55  
56  
57  
58  
59  
60  
61  
62  
63  
64  
65

393 pathway with metabolite was identified, and was considered as an important contributor of that  
394 metabolite.

395 Notably, the BCAA biosynthesis-dependent changes in BCAA levels were largely driven by  
396 *Prevotella* species through threonine-dependent and independent biosynthesis pathways as  
397 observed from Delta SCC<sub>bg</sub> values when genes from this species were removed (see Methods).  
398 The correlation network analysis with differential MGS/CAGs revealed threonine-independent  
399 isoleucine biosynthesis pathway to be highly correlated with *Prevotella copri* in LOC1 (**Fig. 6C**).  
400 The first enzyme, D-citramalate synthase, catalysing the first step of threonine-independent  
401 isoleucine biosynthesis pathway was also observed as highly enriched (LOR = 1.7) in LOC1 [36].  
402 Further, BCAA biosynthesis pathways was found higher in LOC1, whereas BCAA transporters  
403 were higher in LOC2 (**Fig. 6D**) leading to the dynamic changes in BCAA concentrations in faecal  
404 and serum metabolome in LOC1 and LOC2 as observed in Fig. 6A.

405 **Discussion**

406 Compositional and functional human gut microbiome studies in different populations have been  
407 instrumental in establishing the role of gut microbiome in human health [2, 28, 37, 38]. However,  
408 such population-specific signatures and their functional roles are yet unknown for the Indian gut  
409 microbiome. This study provides the first insights into the Indian gut microbiome represented  
410 through a cohort of 110 individuals from two prominent locations to reveal the taxonomic and  
411 functional diversity using 16S rRNA gene, metagenomic analysis, and metabolomic profiling.  
412 Although the sequencing depth was modest ( $1.36 \pm 0.5$  Gbp per sample, mean  $\pm$  standard  
413 deviation), the inclusion of 110 individuals from two distinct geographic locations as well as the  
414 identification of Indian gut microbiome-specific genes provide a first insight into the Indian gut  
415 microbiome and are thus considered important additions to the field. The selection of two distinct

1  
2  
3  
4  
5  
6  
7  
8  
9  
10  
11  
12  
13  
14  
15  
16  
17  
18  
19  
20  
21  
22  
23  
24  
25  
26  
27  
28  
29  
30  
31  
32  
33  
34  
35  
36  
37  
38  
39  
40  
41  
42  
43  
44  
45  
46  
47  
48  
49  
50  
51  
52  
53  
54  
55  
56  
57  
58  
59  
60  
61  
62  
63  
64  
65

416 sub-populations (Bhopal-LOC1, and Kerala-LOC2) was an important consideration to capture the  
417 microbiome variations resulting from different diet and lifestyle of these two cohorts. LOC1  
418 provided a representation of the population from North-Central India mainly consuming a  
419 carbohydrate and fat rich diet, whereas LOC2 represented a population from Southern India  
420 consuming an omnivorous diet with rice and animal-based products as the primary components.

421 This study established the gene catalogue of the Indian gut microbiome, which provides the first  
422 insights into the yet unknown functional gut microbiome of the Indian population. The genes  
423 encoding several transposons, peptidase, glucosidase, and plant polysaccharide degradation  
424 enzymes were unique to the Indian population and not represented in other microbiome datasets.  
425 The Updated-IGC (IGC+India) constructed by the addition of unique non-redundant genes from  
426 the Indian population to the Integrated gene catalogue is likely to act as a reference dataset for gut  
427 microbiome studies for global comparative studies, and particularly for studies involving South-  
428 Asian populations that have similar dietary habits and lifestyle.

429 In addition to the basic housekeeping functions of the gut microbiome, which were also found  
430 abundant in other datasets, the Indian gut microbiome was enriched in functions for carbohydrate  
431 and energy metabolism including degradation of complex polysaccharides, which corroborates  
432 well with the typical carbohydrate-rich diet of the Indian population [39]. The distant clustering of  
433 Indian samples from other populations revealed the unique composition of the Indian gut  
434 microbiota (**Fig. 1B**). *Prevotella* emerged as the most discriminatory genus associated with the  
435 Indian population as revealed by both amplicon and MGWAS. The abundance of *Prevotella* was  
436 also indicated in the previous 16S rRNA gene-based microbiome studies of the Indian population  
437 carried out in small to medium-sized cohorts [18, 19]. Recently, *Prevotella* has been commonly  
438 observed in different non-Western communities that consume a plant-rich diet, such as in the

1  
2  
3  
4  
5  
6  
7  
8  
9  
10  
11  
12  
13  
14  
15  
16  
17  
18  
19  
20  
21  
22  
23  
24  
25  
26  
27  
28  
29  
30  
31  
32  
33  
34  
35  
36  
37  
38  
39  
40  
41  
42  
43  
44  
45  
46  
47  
48  
49  
50  
51  
52  
53  
54  
55  
56  
57  
58  
59  
60  
61  
62  
63  
64  
65

439 Papua New Guineans, native Africans, rural Malawians, BaAka pygmies, etc [11, 40]. and has  
440 also been associated with vegetarianism in the Western populations [41, 42]. However, it has not  
441 been observed at such high abundance in the western countries so far. The MGWAS approach in  
442 this study showed the presence of *Megasphaera*, *Lactobacillus* and *Mitsuokella* as the other major  
443 genera associated with the Indian gut microbiome.

444 Several recent studies have shown a relationship between the abundance of specific strains of  
445 *Prevotella* with inflammatory diseases, since it has a higher intrinsic capacity to stimulate Th17-  
446 mediated inflammation, which is generally not expected in a strict commensal bacterium [41, 43,  
447 44]. However, the high abundance of *Prevotella* in the healthy gut microbiome of the Indian  
448 population does not corroborate with its potential inflammatory role reported so far. Since this  
449 study was only focussed on the gut microbiome of healthy individuals, it is difficult to draw  
450 conclusions on the potential inflammatory role of this species. One potential explanation could be  
451 the complex set of interactions between host genetic risk factors and environment in which the  
452 presence of *Prevotella* may be only one of the factors [45]. Further, strain-level variations are  
453 known in the inflammatory responses and not all species of *Prevotella* could be potentially  
454 inflammatory, as also evident from the known high genetic diversity within and between the  
455 species of *Prevotella* [43]. Thus, the high abundance of *Prevotella* in the healthy microbiota  
456 emphasizes the requirement for larger cohort studies in different populations to gain deeper  
457 insights into the potential inflammatory roles of gut microbes.

458 The abundance of *Prevotella* has been associated with plant-based diets, and the typical  
459 carbohydrate-rich diet of the Indian population could be one of the reasons for the over-  
460 representation of this genus in the Indian gut microbiome [46]. Likewise, the predominance of  
461 other microbial species from genus *Lactobacillus*, *Megasphaera* and *Mitsuokella* could be due to

1  
2  
3  
4  
5  
6  
7  
8  
9  
10  
11  
12  
13  
14  
15  
16  
17  
18  
19  
20  
21  
22  
23  
24  
25  
26  
27  
28  
29  
30  
31  
32  
33  
34  
35  
36  
37  
38  
39  
40  
41  
42  
43  
44  
45  
46  
47  
48  
49  
50  
51  
52  
53  
54  
55  
56  
57  
58  
59  
60  
61  
62  
63  
64  
65

462 the higher intake of fermented food and dairy products along with the carbohydrate-rich diet in  
463 LOC1 [46, 47]. Similarly, *Bacteroides* and *Clostridium*, which were abundant in LOC2, are  
464 associated with diets rich in animal-based products, consistent with the omnivorous diet of LOC2  
465 [42]. Interestingly, taxonomy-based clusters 1 and 2 showed associations with the two locations  
466 LOC1 and LOC2, and also with the two KO-based clusters (C1 and C2) (**Additional File 5: Figure**  
467 **S10 and S11**). It is to be noted that C1 was enriched in enzymes involved in the degradation of  
468 carbohydrate and plant polysaccharides, which correlates well with the carbohydrate-rich diet in  
469 LOC1. In contrast, C2 was enriched in enzymes involved in lipid and protein degradation, which  
470 relate to the constituents of an omnivorous diet in LOC2. These observations further support the  
471 correlation between location, diet and enterotype. Although, the concept of enterotype  
472 classification is sometimes criticised due to statistical weakness in some studies, however, a meta-  
473 analysis of Indian samples with samples from Arumugam et al. revealed three robust clusters with  
474 Indian samples mostly associated with enterotype-2 driven by *Prevotella* [2]. This classification  
475 of samples from multiple population/studies into enterotypes has the potential to be clinically  
476 relevant in various aspects such as disease diagnosis, early-detection of disease, biomarker  
477 development, personalised treatments and xenobiotic metabolism [48]. It is a representation of the  
478 major microbial species in the gut microbiome, and thus appears useful for microbiome-based  
479 population stratification. A robust statistical analysis with increased sample sizes, direct clinical  
480 associations, and detailed molecular interventions are essential for further strengthening its  
481 potential.

482 The study also established the previously unknown faecal metabolome of the Indian population,  
483 which showed strong clustering into three metabolomic clusters differentiated by location and diet.  
484 The metabolomic clusters also correlated well with the respective dietary habits of the two

1  
2  
3  
4  
5  
6  
7  
8  
9  
10  
11  
12  
13  
14  
15  
16  
17  
18  
19  
20  
21  
22  
23  
24  
25  
26  
27  
28  
29  
30  
31  
32  
33  
34  
35  
36  
37  
38  
39  
40  
41  
42  
43  
44  
45  
46  
47  
48  
49  
50  
51  
52  
53  
54  
55  
56  
57  
58  
59  
60  
61  
62  
63  
64  
65

485 locations, where metabolomic Cluster-1 showed an association with LOC1 and was enriched in  
486 saturated fatty acids such as palmitic acid and stearic acid, whereas metabolomic Cluster-3 showed  
487 an association with LOC2, and was enriched in BCAAs such as isoleucine, valine and leucine, and  
488 SCFAs such as propionic acid, and butyric acid. A medium chain fatty acid (MCFA) ‘lauric acid’  
489 was also found abundant in LOC2 perhaps due to the high dietary consumption of coconut oil in  
490 this location [49, 50]. Lauric acid has been reported to be beneficial by preventing fat deposition  
491 in blood vessels and acting as an anti-inflammatory and anti-oxidative agent [51].

492 The major BCAA ‘isoleucine’ being produced through a less common threonine-independent  
493 pathway for isoleucine biosynthesis, and the higher enrichment of the key enzyme, D-citramalate  
494 synthase of the above pathway confirmed its higher abundance in LOC1 as compared to LOC2.  
495 Further, this pathway was found to be associated with a single species, *Prevotella copri* as reported  
496 earlier [8]. Taken together, it appears that the higher abundance of BCAA biosynthesis genes and  
497 a lower abundance of BCAA inward transporters in gut microbiome resulted in the lower BCAA  
498 accumulation in the fecal metabolome, and higher BCAA concentration in serum as observed in  
499 LOC1 (Fig. 7) [8]. However, a contrasting pattern was observed in the case of LOC2, where the  
500 lower abundance of BCAA biosynthesis genes and the higher abundance of BCAA inward  
501 transporters correlated well with the higher and lower BCAA concentrations in faeces and serum,  
502 respectively.

503 The higher levels of SCFAs in LOC2 could be a consequence of the consumption of omnivorous  
504 diet, which is associated with a Firmicutes-rich gut microbiome [52]. SCFAs have well-established  
505 roles in human health as an energy source, an anti-inflammatory agent, and for improving intestinal  
506 homeostasis by increasing IL-18 production [53]. In contrast, higher serum BCAA levels have  
507 well-known roles in promoting insulin resistance and Type-2 Diabetes (T2D), and were found

1  
2  
3  
4 508 higher in the serum in LOC1. Several reports on the role of a high-fat diet in the modulation of  
5  
6 509 microbiota and alteration in intestinal barrier are emerging with results showing increased  
7  
8  
9 510 absorption and circulating levels of branched-chain amino acid (BCAA) and reduction of SCFAs  
10  
11 511 such as butyrate, acetate, propionate, and secondary bile acids, as also noted in the case of LOC1  
12  
13  
14 512 [54, 55]. High-fat and carbohydrate-rich diets have also been associated with an increase in  
15  
16 513 abundance of Bacteroidetes (gram-negative bacteria) leading to a skewed Bacteroidetes:  
17  
18  
19 514 Firmicutes ratio towards the former phylum [32]. Such a ratio was also apparent in this study in  
20  
21 515 LOC1 dominated by *Prevotella* from the phylum Bacteroidetes. Further, a higher serum  
22  
23  
24 516 concentrations of circulating BCAA were also observed in LOC1. These results provide hints on  
25  
26 517 the role of dietary habits in shaping the gut microbiome and its plausible impact on the BCAA and  
27  
28  
29 518 SCFA dynamics observed in these populations.

30  
31  
32 519 To conclude, this multi-omics based gut microbiome study of a healthy cohort from two different  
33  
34 520 parts of India provides novel insights into the Indian gut microbiome and metabolome, and reveals  
35  
36 521 the unique gene catalogue from the poorly characterized Indian population. Further studies using  
37  
38  
39 522 higher sequencing depths, and including both healthy and diseased individuals will help in  
40  
41 523 obtaining more comprehensive functional and taxonomic information of gut microbiome from  
42  
43  
44 524 Indian population and its impact on human health.

## 45 46 47 525 **Methods**

### 48 49 50 526 **Study design and subject enrolment**

51  
52  
53 527 The study cohort consisted of 110 healthy individuals belonging to different age groups from  
54  
55  
56 528 infants (<1 year) to aged (>50 years), with an average subject age of  $29.72 \pm 17.4$  years (mean  $\pm$   
57  
58 529 sd) from two different locations across India i.e., Bhopal (LOC1, n=53) and Kerala (LOC2, n=57),  
59  
60  
61  
62  
63  
64  
65

1  
2  
3  
4 530 which are separated by ~1000 miles. LOC1 was located in North-Central India with the majority  
5  
6  
7 531 of population being vegetarian, whereas LOC2 was located in Southern India where the population  
8  
9 532 with dietary habits mostly consisting of rice, seafood and red meat (Diet description section in  
10  
11 **Additional File 1**). According to the 'Indian Food Composition Table', the primary Indian diet is  
12  
13  
14 534 rich in carbohydrates such as rice, wheat and potato, and in fat and proteins from milk and dairy  
15  
16 535 products [56]. In addition, several accompaniments to the primary diet also exist including a  
17  
18  
19 536 variety of grains, vegetables, fruits, and usage of oil, spices and animal products.

20  
21  
22 537 The faecal samples for metagenomics and blood samples for serum metabolomics were collected  
23  
24 538 from healthy participants and their metadata is provided in **Additional File 1** under the Metadata  
25  
26  
27 539 information section. The recruitment of volunteers, sample collection, and other study-related  
28  
29  
30 540 procedures were carried out by following the guidelines and protocols approved by the Institute  
31  
32 541 Ethics Committee of Indian Institute of Science Education and Research (IISER), Bhopal, India.  
33  
34 542 Each faecal sample was frozen within 30 mins of collection. A written informed consent was  
35  
36  
37 543 obtained from all subjects prior to any study-related procedures, along with information on gender,  
38  
39 544 age, and diet for a period of one month prior to the collection of faecal samples. The recruited  
40  
41  
42 545 individuals did not undergo any medication at least one month prior to the sample collection. All  
43  
44 546 the recruited individuals had an average BMI of 21.16 ( $\pm 5.23$ ), and were not diagnosed with T2D  
45  
46  
47 547 at the time of sample collection, and did not have a second-degree relative history of T2D. The  
48  
49 548 above samples were then used for 16S rRNA gene V3 hypervariable region amplicon sequencing,  
50  
51 549 shotgun metagenomic sequencing, and metabolomic analysis.

#### 52 53 54 55 550 **Faecal metagenomic DNA extraction**

56  
57 551 Metagenomic DNA was isolated from all the faecal samples using QIAamp Stool Mini Kit  
58  
59  
60 552 (Qiagen, CA, USA) according to the manufacturer's instructions. DNA concentration was  
61  
62  
63  
64  
65



1  
2  
3  
4 553 estimated by Qubit HS dsDNA assay kit (Invitrogen, CA, USA), and quality was estimated by  
5  
6 554 agarose gel electrophoresis. All the DNA samples were stored at -80 °C until sequencing.  
7  
8  
9

### 10 555 **16S rRNA gene amplicon and shotgun metagenome sequencing**

11  
12 556 The extracted DNA (5ng) was PCR amplified with seven different custom modified 5'-end  
13  
14  
15 557 adaptor-ligated 341F and 534R primers (See the primer details section in Additional File 1)  
16  
17 558 targeting the V3 hypervariable region of 16S rRNA gene. After evaluating the amplified products  
18  
19  
20 559 on 2% w/v agarose gel, the products were purified using Ampure XP kit (Beckman Coulter, Brea,  
21  
22 560 CA USA). Amplicon libraries were prepared by following the Illumina 16S rRNA gene  
23  
24 561 metagenomic library preparation guide. Metagenomic libraries were prepared using Illumina  
25  
26  
27 562 Nextera XT sample preparation kit (Illumina Inc., USA) by following the manufacturer's protocol.  
28  
29  
30 563 Library size of all the libraries was assessed using Agilent 2100 Bioanalyzer (Agilent  
31  
32 564 Technologies, Santa Clara, USA.), and quantified on a Qubit 2.0 fluorometer using Qubit dsDNA  
33  
34 565 HS kit (Life technologies, USA) and by qPCR using KAPA SYBR FAST qPCR Master mix and  
35  
36  
37 566 Illumina standards and primer premix (KAPA Biosystems, Wilmington, MA, USA) following the  
38  
39 567 Illumina suggested protocol. Both the amplicon and metagenomic libraries were loaded on  
40  
41  
42 568 Illumina NextSeq 500 platform using NextSeq 500/550 v2 sequencing reagent kit (Illumina Inc.,  
43  
44 569 USA), and 150 bp paired-end sequencing was performed at the Next-Generation Sequencing  
45  
46  
47 570 (NGS) Facility, IISER Bhopal, India.  
48  
49

### 50 571 **Amplicon-based taxonomic analysis**

51  
52 572 A total of 24 Gbps of data were retrieved on de-multiplexing of paired-end reads with an average  
53  
54  
55 573 of 210 Mbp per sample. The paired-end reads were assembled using FLASH and were quality  
56  
57 574 filtered at Q20 (80% bases) Phred quality score using NGSQC Toolkit v 2.3.3 [57, 58]. The primer  
58  
59  
60 575 sequences were trimmed from the High Quality (HQ) reads. The reads were further clustered into  
61  
62  
63  
64  
65

1  
2  
3  
4 576 OTUs using closed-reference OTU picking protocol of QIIME at  $\geq 97\%$  identity against ARB  
5  
6 577 SILVA database release 132 (13<sup>th</sup> December 2017) [59, 60]. The most abundant read was selected  
7  
8  
9 578 as the representative sequence for each OTU and was assigned with taxonomy using the SILVA  
10  
11  
12 579 database. OTU table containing the abundance of each OTU for each sample was generated and  
13  
14 580 used for further analysis. For phylogenetic analysis, representative 16S rRNA genes of phylotypes  
15  
16 581 were aligned against a core set of 16S rRNA gene sequences using align\_seqs.py with the PyNAST  
17  
18  
19 582 v.1.2.2 algorithm [61]. The unweighted UniFrac distances between samples were calculated using  
20  
21 583 rarefied OTU abundance (100,000 seqs/sample) table and phylogenetic distances between  
22  
23  
24 584 representative sequences from each OTUs [62].  
25  
26

### 27 585 **Pre-processing of the Metagenomic reads**

28  
29 586 A total of 150 Gbp of metagenomic sequence data (mean = 1.36 Gb) was generated from 110  
30  
31  
32 587 faecal samples. The metagenomic reads were filtered using NGSQC toolkit v2.3.3 with a cutoff  
33  
34 588  $\geq Q20$  [57]. The high-quality reads were further filtered to remove the host-origin reads (human  
35  
36 589 contamination) from metagenomic reads using 18mer matches parameter in Best Match Tagger  
37  
38  
39 590 BMTagger v3.101 (BMTagger, RRID:SCR\_014619; [http://casbioinfo.cas.unt.edu/sop/mediawiki/](http://casbioinfo.cas.unt.edu/sop/mediawiki/index.php/Bmtagger)  
40  
41 591 [index.php/Bmtagger](http://casbioinfo.cas.unt.edu/sop/mediawiki/index.php/Bmtagger)), which resulted in the removal of an average of 1% reads. The reads from  
42  
43  
44 592 each sample were assembled separately into contigs using IDBA ud version 1.1.0 [63] with  
45  
46 593 parameters “-mink 31 -maxk 87 -step 5”. The reads from each samples were mapped to contigs  
47  
48  
49 594 to estimate read recruitment using FR-HIT version 0.7 [64]. The unmapped reads resulting from  
50  
51 595 each sample were pooled together and denovo assembly was performed on the combined set of  
52  
53  
54 596 singleton (unmapped) reads from all samples. The ORFs from each contig (length  $\geq 500$ bp) were  
55  
56 597 predicted using MetaGeneMark v.3.38 [65]. Pair-wise alignment of genes was performed using  
57  
58  
59 598 BLAT version 2.7.6 [66], and the genes which had an identity  $\geq 95\%$  and alignment coverage  $\geq$   
60  
61  
62  
63  
64  
65

1  
2  
3  
4 599 90% were clustered into a single set of non-redundant genes, from which the longest gene was  
5  
6  
7 600 selected as the representative ORF to construct the non-redundant gene catalog.

8  
9  
10 601 Integrated Gene Catalog (IGC), which represents 1,297 human gut metagenomic samples  
11  
12 602 comprising of HMP, MetaHIT and Chinese datasets, was retrieved [24]. The gene catalogue  
13  
14  
15 603 constructed from Indian samples was combined with the IGC to construct a non-redundant gene  
16  
17 604 catalog (using identity  $\geq 95\%$  and alignment coverage  $\geq 90\%$ ) and is referred to as ‘Updated-IGC’  
18  
19  
20 605 in the subsequent analysis.

### 21 22 23 606 **Quantification of gene content**

24  
25 607 The quantification of gene content was carried out using the strategy performed by Qin et al., [7]  
26  
27  
28 608 where the high-quality reads were aligned against the updated IGC using SOAP2 in SOAP aligner  
29  
30 609 version 2.21 with an identity cut off  $\geq 90\%$  [67]. Two types of alignments were considered for  
31  
32  
33 610 sequence-based profiling:

34  
35  
36 611 (1) The entire paired-end read mapped to the gene.

37  
38  
39 612 (2) One end of paired-end read mapped to a gene and other end outside genic region.

40  
41  
42 613 In both cases, the mapped read was counted as one copy.

43  
44  
45  
46 614 The relative abundance of a gene within the sample was calculated as:  $a_i = \frac{b_i}{\sum_j b_j}$

47  
48  
49  
50 615  $a_i$ : relative abundance of gene in sample S;  $x_i$ : The times in which gene i was detected in sample S  
51  
52  
53 616 (the number of mapped reads);  $b_i$ : copy number of gene i in sequenced data from sample S.

### 54 55 56 617 **Phylogenetic assignment of reads**

57  
58  
59  
60  
61  
62  
63  
64  
65

1  
2  
3  
4 618 A total of 4,097 reference microbial genomes were obtained from Human Microbiome Project  
5  
6 619 (HMP) and National Centre for Biotechnology Information (NCBI) on 5<sup>th</sup> December 2015  
7  
8  
9 620 (**Additional File 18**). The databases were independently indexed into two Bowtie indexes using  
10  
11 621 Bowtie-2 version 2.2.9 (Bowtie 2, RRID:SCR\_016368) [68]. The metagenomic reads were aligned  
12  
13  
14 622 to the reference microbial genomes using Bowtie-2. The mapped reads from both indexes were  
15  
16 623 merged by selecting the alignment having the higher identity ( $\geq 90\%$  identity). The percent identity  
17  
18  
19 624 was calculated using the formula:  $\%identity = 100 * (\text{matches} / \text{total aligned length})$ . The normalized  
20  
21 625 abundance of a microbial genome was calculated by summing the total number of reads aligned to  
22  
23  
24 626 its reference genome. For reads showing hits to both indexed databases with equal identity, each  
25  
26 627 genome was assigned 0.5 read count. The relative abundance of each genome was calculated by  
27  
28  
29 628 adding the normalized abundance of each genome divided by the total abundance. The Calinski  
30  
31 629 Harabasz index (CHI) was used to calculate the variance between the clusters compared to the  
32  
33  
34 630 variance within clusters [2].  
35

### 36 631 **Construction of common core microbial functions**

37  
38  
39 632 To identify the core microbial functions in the gut microbiome of Indian populations and to  
40  
41 633 understand their abundance compared to the other populations, the core microbiome was  
42  
43  
44 634 constructed using a similar strategy as mentioned in MetaHIT [25]. However, to construct a  
45  
46 635 comprehensive core functional microbiome, the information of essential functions from six  
47  
48  
49 636 different microbes including two strains of *Escherichia coli*, *Bacteroides thetaiotaomicron*,  
50  
51 637 *Pseudomonas aeruginosa*, *Salmonella enteric* and *Staphylococcus aureus*, was used instead of  
52  
53  
54 638 considering a single microorganism. The list of essential genes was collected from DEG database  
55  
56 639 v5.0 [69]. 1,890 genes were identified as essential genes in all the six microorganisms. These genes  
57  
58  
59 640 were aligned against eggnog v4.1 database using diamond and were annotated with eggNOG ID  
60  
61  
62  
63  
64  
65

1  
2  
3  
4 641 [70, 71]. The core gut microbiome functions were also calculated using the above strategy for the  
5  
6 642 USA, Denmark and Chinese population gut microbial samples to remove the variations arising  
7  
8  
9 643 due to differences in data analysis procedures. Apart from identifying the clusters that represented  
10  
11 644  $\geq 85\%$  genes within the range of essential gene functions, the low prevalent eggNOG functions,  
12  
13  
14 645 which were present in  $\geq 0.0001\%$  abundance in  $\geq 80\%$  of samples in that population, were further  
15  
16 646 filtered out. This added filtration step helped in removing all the low abundant functions. To  
17  
18  
19 647 represent the core, the variance of these functions was also calculated between the two Indian  
20  
21 648 locations. The eggNOGs showing significant deviations in variations ( $P\text{-value} \leq 0.05$ ; Levene's  
22  
23  
24 649 test) [72] were further filtered out from the analysis.

### 27 650 **Construction of Metagenomic Species for MGWAS**

28  
29  
30 651 To identify metagenomic markers using a reference-independent approach on metagenomic  
31  
32 652 samples, a metagenome-wide association study was performed for 340 samples (age and gender  
33  
34 653 matched) including India (both locations), USA, China and Denmark populations. The genes  
35  
36  
37 654 present in at least  $\geq 10\%$  of samples were considered and clustered using the canopy-mgs algorithm  
38  
39 655 as described [73]. The genes having Pearson's correlation coefficient ( $\geq 0.9$ ) were clustered into  
40  
41  
42 656 CAGs. Furthermore, the genes for which  $\geq 90\%$  abundance was obtained from a single sample  
43  
44 657 were discarded.

45  
46  
47  
48 658 To determine the taxonomic origin of each MGS/CAG (metagenomic cluster), all the genes were  
49  
50 659 aligned against reference microbial genomes of 4,097 genomes from HMP and NCBI at nucleotide  
51  
52 660 level using BLASTN [74]. The alignment hits were filtered using an E-value  $\leq 10^{-6}$  and alignment  
53  
54  
55 661 coverage  $\geq 80\%$  of the gene length, and 2,773,591 (25.6%) genes showed alignments against the  
56  
57  
58 662 reference genomes. The remaining 8,049,540 unassigned genes were aligned against UNIREF  
59  
60 663 database (UniRef 50) at protein sequences [75], of which 4,553,299 genes (56.56%) could be

1  
2  
3  
4 664 assigned with taxonomic annotations. The sequences that found multiple top hits with equal %  
5  
6 665 sequence identity and scores were further assigned taxonomy based on LCA (Lowest Common  
7  
8  
9 666 Ancestor) method. The genes were finally assigned to taxa based on comprehensive parameters of  
10  
11 667 sequence similarity across phylogenetic ranks as described earlier [76]. The identity threshold of  
12  
13  
14 668  $\geq 95\%$  was used for assignment up to species level,  $\geq 85\%$  identity threshold for assignment up to  
15  
16 669 genus level, and  $\geq 65\%$  identity was used for phylum level assignment using BLASTN. The  
17  
18  
19 670 taxonomic assignments of MGS/CAGs were performed with the criteria that  $\geq 50\%$  genes in each  
20  
21 671 MGS should map to the same lowest phylogenetic group. Thus, if a particular species is assigned  
22  
23  
24 672  $\geq 50\%$  genes out of the total genes, the assignment will be carried out at species level rather than  
25  
26 673 at genus or higher orders. The relative abundance of MGS/CAGs in each sample was estimated by  
27  
28  
29 674 using relative abundance values of all genes from that MGS/CAG. A Poisson distribution was  
30  
31 675 fitted to the relative abundance values of the data. The mean estimated from Poisson distribution  
32  
33  
34 676 was assigned as the relative abundance of that MGS. The profile of MGS/CAGs were generated  
35  
36 677 and used for further analysis.

### 678 **Faecal and Serum metabolomic sample preparation and derivatization**

679 Lyophilized faecal samples were used to achieve better metabolite coverage as described  
680 previously [77]. Metabolites were extracted with 1 mL of ice-cold methanol: water (8:2) from 80  
681 mg of lyophilized samples in a bath ultrasonicator (Bioruptor<sup>TM</sup> UCD-200, Diagenode, USA) at  
682 4°C for 30 min followed by 2 min of vortexing. The supernatant was extracted by centrifugation  
683 at 18,000 g for 15 min at 4°C and dried at 50°C under a gentle stream of nitrogen gas. To remove  
684 the residual water molecules from the samples, 100uL of toluene was added to the dry residue and  
685 evaporated completely at 50°C under nitrogen gas. Dry extracted metabolites were first derivatized  
686 with 50 uL of methoxyamine hydrochloride (MOX) in pyridine (20 mg/mL) at 60°C for 2 hours,

1  
2  
3  
4 687 and the second derivatization was performed with 100 uL of MSTFA in 1% TMCS at 60°C for 45  
5  
6 688 min to form trimethylsilyl (TMS) derivatives. Finally, 150 uL of the TMS derivatives was  
7  
8  
9 689 transferred into a GC glass vial inserts and subjected to GC/TOFMS analysis. Serum samples were  
10  
11  
12 690 prepared (polar metabolites only) and derivatized as described by Psychogium et al., 2011 [78].  
13

#### 14 691 **Method development and validation**

15  
16  
17 692 Matrix dilution approach was used for validating the linearity and range of dilution [77]. Pooled  
18  
19  
20 693 faecal samples were used to create the reference peaks to validate the peaks coming from  
21  
22 694 individual samples, which were needed due to the presence of a relatively high abundance of faecal  
23  
24  
25 695 metabolites in the pooled samples. The supernatant of feces after extraction was serially diluted 2,  
26  
27 696 5, 10, 50, 100, 200 and 500 times with methanol: water (8:2). At dilution 2, the maximum numbers  
28  
29  
30 697 of peaks were seen and were processed with the same dilution factor for all the samples. A total of  
31  
32 698 30 chemical standards mixture and the pooled faecal samples were used to validate the method.  
33  
34  
35 699 Each stock solution of test standard was carefully prepared in deionized water or with pure ethanol  
36  
37 700 (50,150 350, 500 um) for the determination of linear range, regression coefficient (R<sup>2</sup>), limit of  
38  
39 701 detection (LOD), and repeatability. L-norvaline (1, 2.5, 5, 10, 20 mg/ml in ethanol) was used as a  
40  
41  
42 702 spiked external standard for the optimized derivatization of the method.  
43

#### 44 703 **GC-MS analysis**

45  
46  
47  
48 704 GC-MS was performed on an in-house Agilent 7890A gas chromatograph with 5975C MS system.  
49  
50 705 An HP-5 (25 m × 320 um × 0.25 um i.d.) fused silica capillary column (Agilent J&W Scientific,  
51  
52  
53 706 Folsom, CA) was used with the open split interface. The injector, transfer line and ion source  
54  
55 707 temperatures were maintained at 220, 220 and 250 °C, respectively. Oven temperature was  
56  
57  
58 708 programmed at 70°C for 0.2 min, and increased at 10°C/min to 270°C where it was sustained for  
59  
60 709 5 min, and further increased at 40°C/min to 310°C where it was held for 11 minutes. The MS was  
61  
62  
63  
64  
65

1  
2  
3  
4 710 operated in the electron impact ionization mode at 70eV. Mass data were acquired in full scan  
5  
6 711 mode from m/z 40 to 600 with an acquisition rate of 20 spectra per second. To detect retention  
7  
8 712 time shifts and enable Kovats retention index (RI) calculation, a standard Alkane series mixture  
9  
10 713 (C10–C40) was injected periodically during the sample analysis. RIs are relative retention times  
11  
12 714 normalized to n-alkanes eluted adjacently. For serum samples, we used 2uL aliquot with a split  
13  
14 715 ratio of 4:1 on the same column as described above. The injector port temperature was held at  
15  
16 716 250°C, and the helium gas flow rate was set to 1mL/min at an initial oven temperature of 50°C.  
17  
18 717 The oven temperature was increased at 10°C/min to 310°C for 11min and mass data were acquired  
19  
20 718 in full scan mode from m/z 40 to 600 with an acquisition rate of 20 spectra per second.  
21  
22  
23  
24

#### 25 26 719 **Metabolomic analysis and metabolite profile generation**

27  
28  
29 720 Raw CDF files were used for peak identification and filtering, and the XCMS package in R were  
30  
31 721 used for pre-processing of the peaks. First, the parameters used for pre-processing of the reads  
32  
33 722 were optimized by calculating the reliability index using the formula given below:  
34  
35  
36

37 723 Reliability index = (number of reliable peaks)<sup>2</sup>/number of unreliable peaks.  
38  
39

40 724 The reliable peaks were identified for each of the settings such as fwhm, S/N and bw, with a  
41  
42 725 predefined range of values and regression coefficient was calculated for dilutions of QC samples.  
43  
44

45 726 The number of peaks with a high coefficient of determination ( $R^2 \geq 0.9$ ) were considered reliable,  
46  
47 727 whereas the peaks with very low  $R^2 (\leq 0.05)$  were considered unreliable peaks [79]. The finally  
48  
49 728 optimized parameters were: profmethod = bin, method = matched Filter, fwhm =8 and 5 for  
50  
51 729 faecal and serum samples, respectively, and S/N = 12 and 3 for faecal and serum samples,  
52  
53 730 respectively, bw =5 (for first grouping), smooth = linear, family = gaussian, extra = 1, plot type  
54  
55 731 = mdevden, missing =8, bw = 3 (for second grouping). Further, to compare across multiple  
56  
57 732 samples, the peak intensities were normalized (root transformed) and scaled using z-  
58  
59  
60  
61  
62  
63  
64  
65



1  
2  
3  
4 733 transformation. These normalized and scaled peak intensities were used for further statistical  
5  
6 734 analysis.

7  
8  
9 735 A multivariate statistical method, Orthogonal Projections to Latent Structures Discriminant  
10  
11 736 Analysis (OPLS-DA) [80], was used to identify differences between LOC1 samples (n=53) and  
12  
13  
14 737 LOC2 (n=55) samples. Metabolites driving the differences were identified in metabolic profiles  
15  
16 738 of LOC1 and LOC2 samples using correlations coefficients. The clusters of co-abundant  
17  
18  
19 739 metabolite profiles were identified using R package "WGCNA" [81]. Signed weighted  
20  
21 740 metabolite co-abundance correlation after scaling and centering was calculated across all  
22  
23  
24 741 samples. The soft threshold of  $\beta = 15$  was chosen for scale-free topology. The dynamic hybrid  
25  
26 742 tree cutting algorithm was used to identify the clusters with a deepsplit = 4 and minimum cluster  
27  
28  
29 743 size = 4. The profile of each faecal metabolite cluster was summarized using eigenvector. The  
30  
31 744 abundance profile of each cluster of metabolites (MES) was calculated using the same  
32  
33  
34 745 methodology as used for MGS cluster abundance profiles.

#### 35 36 746 **Retention index (RI) calculation**

37  
38  
39 747 GC-MS data obtained from the alkene series run was used to calculate the RI for each peak in  
40  
41  
42 748 the samples, and the obtained RI values were further used at the time of library search for the  
43  
44 749 identification of individual metabolite.

$$45  
46  
47 750 \quad I = 100 X [n + (\log tx - \log tn) / (\log tn + 1 - \log tn)]$$

48  
49  
50 751 Where, tx = retention time of the peak, tn = retention time of preceding alkane, and tn+1 =  
51  
52 752 retention time of the following alkane.

#### 53 54 55 56 753 **Clustering and enterotype Analysis**

57  
58  
59  
60  
61  
62  
63  
64  
65

1  
2  
3  
4  
5  
6  
7  
8  
9  
10  
11  
12  
13  
14  
15  
16  
17  
18  
19  
20  
21  
22  
23  
24  
25  
26  
27  
28  
29  
30  
31  
32  
33  
34  
35  
36  
37  
38  
39  
40  
41  
42  
43  
44  
45  
46  
47  
48  
49  
50  
51  
52  
53  
54  
55  
56  
57  
58  
59  
60  
61  
62  
63  
64  
65

754 Cluster of samples in the dataset were identified from the relative abundance profiles of Genus or  
755 Orthologous groups (OG) in the samples. The Jensen-Shannon distances (which estimates the  
756 probability distributions between the samples) were calculated and the abundance profiles were  
757 clustered using PAM (partitioning around medoids) clustering algorithm as mentioned previously  
758 [82]. The optimal number of clusters was assessed using Calinski Harabasz index (CHI) that has  
759 shown good performance in recovering the optimal number of clusters [83]. Similarly, the  
760 prediction strength from ‘fpc’ package in R which used cross-validation approach was also  
761 employed as another metric for cluster validation. Both the CHI and prediction strength showed  
762 quite significantly correlated results. For clustering, CHI and prediction strength gave non-  
763 identical values, silhouette index was calculated to estimate the robustness of clusters.

**764 Between class analysis**

765 The between class analysis was performed to identify the drivers and support the clustering of the  
766 genus/species/OG abundance profiles into clusters. The between class analysis is a type of  
767 principal component analysis with instrumental variables which maximizes the separation between  
768 classes of this variable. The instrumental variables here is the cluster classification using PAM  
769 clustering and the top species, which contributed the maximum to the principal components  
770 obtained from between class analysis were identified as driver species/genus/OG based on their  
771 eigenvalues. The analysis was performed using ade4 package in R.

**772 Diversity Analysis**

773 The inter-sample Canberra distances were also calculated using MGS Abundance between  
774 populations. The richness of microbiome samples across populations was obtained from Shannon  
775 index calculated using raw gene abundance table rarefied at equal depth (1,000,000 seqs/sample)  
776 over n=30 random samplings. The beta diversity for 16S rRNA genes (between the samples) was

1  
2  
3  
4  
5  
6  
7  
8  
9  
10  
11  
12  
13  
14  
15  
16  
17  
18  
19  
20  
21  
22  
23  
24  
25  
26  
27  
28  
29  
30  
31  
32  
33  
34  
35  
36  
37  
38  
39  
40  
41  
42  
43  
44  
45  
46  
47  
48  
49  
50  
51  
52  
53  
54  
55  
56  
57  
58  
59  
60  
61  
62  
63  
64  
65

777 calculated as unweighted UniFrac distances using OTU tables rarefied at 100,000 seqs/sample  
778 and phylogenetic distance between representative sequences from each OTU [84]. The effect of  
779 covariates such as age, diet, location (LOC1 and LOC2) and gender were compared for correlation  
780 with principal components identified from principal component analysis using UniFrac distances.  
781 The polyserial correlations with P-values were calculated for categorical variables and the  
782 significance of the covariates for explaining the variation was estimated at each principal  
783 component.

784 **Network Analysis**

785 Spearman's rank correlations were computed between each of the species/MGS and the between  
786 MGS and functional modules/metabolites. The correlations with significant P-values were selected  
787 and were used for the network analysis. The undirected links were generated between correlated  
788 nodes (species/KOs/modules) and the strength of the links were given weights based on their  
789 correlation coefficients. The network structure was generated using "igraph" package in R. The  
790 modularity of the network for KOs association was generated with each module representing the  
791 functional modules defined in KEGG database. The negative correlation was not considered in  
792 generating the network modules. Moreover, the positive correlations were filtered ( $\rho \geq 0.6$ ) for  
793 most of the network analysis.

794 **Supervised learning**

795 Predictive models were built using supervised machine learning algorithm Random Forest  
796 (RF)[85]. The models were optimized using 10,000 trees and default settings of mtry (number for  
797 variables used to build the model). The mean three-fold cross-validation error rates were calculated  
798 for each of the binary tree and the ensemble of trees. The mean decrease in accuracy, which is the  
799 increase in error rates on leaving the variable out, was calculated for each prediction and tree and

1  
2  
3  
4 800 was used to estimate the importance score. The variables showing a higher mean decrease in  
5  
6 801 accuracy of prediction were considered important for the segregation of the datasets into groups  
7  
8  
9 802 based on the categorical variable.

### 10 11 12 803 **Statistical Analysis**

13  
14  
15 804 All the statistical comparisons between groups were performed using Negative Binomial model-  
16  
17 805 based Wald test implemented in DESeq2 and non-parametric Wilcoxon Rank-Sum Test with FDR  
18  
19  
20 806 Adjusted P-Values to control for multiple comparisons [86-88]. The correlations between two  
21  
22 807 variables and the correlations within were calculated using Spearman's Correlation Coefficient  
23  
24  
25 808 with Adjusted P-Values [89]. The correlations between categorical and numeric variables were  
26  
27 809 performed using Polyserial correlation/biserial correlations [90]. To identify the enrichment of  
28  
29  
30 810 enzymes/species associated with a host, Odds Ratio was used as a measure of the enrichment of a  
31  
32 811 feature in a group. The Odds Ratio was calculated as  $OR(k) = \frac{[\sum_{s=LOC1} A_{sk} / \sum_{s=LOC1} (\sum_{i \neq k} A_{si})]}{[\sum_{s=LOC2} A_{sk} / \sum_{s=LOC2} (\sum_{i \neq k} A_{si})]}$  for enrichment of genes/species between two locations, where  
33  
34 812  $A_{sk}$  denotes abundance of species/gene k in sample S. Also the enrichment of species/genes  
35  
36  
37 813 between Indian microbiome compared to other datasets consisting of USA, Denmark and China  
38  
39 814 referred as "OTHERS" were computed as  $OR(k) = \frac{([\sum_{s=INDIA} A_{sk} / \sum_{s=INDIA} (\sum_{i \neq k} A_{si})]}{([\sum_{s=OTHERS} A_{sk} / \sum_{s=OTHERS} (\sum_{i \neq k} A_{si})]}$ . All the graphs and plots were generated using the ggplot2 package in R.  
40  
41  
42 815  
43  
44 816  
45  
46

### 47 817 **Correlation analysis between functional modules and metabolite clusters**

48  
49  
50 818 To calculate the association of microbial functional modules with faecal metabolite clusters, the  
51  
52 819 Spearman's correlation coefficients were calculated to rank KOs for association with metabolite  
53  
54  
55 820 clusters and Metabotypes. To quantify the shift in Spearman correlation between given KEGG  
56  
57 821 module and the metabolite cluster compared to the background distribution, the background  
58  
59  
60 822 adjusted median Spearman's correlation was calculated for a given KEGG module m as:

1  
2  
3  
4  
5  
6  
7  
8  
9  
10  
11  
12  
13  
14  
15  
16  
17  
18  
19  
20  
21  
22  
23  
24  
25  
26  
27  
28  
29  
30  
31  
32  
33  
34  
35  
36  
37  
38  
39  
40  
41  
42  
43  
44  
45  
46  
47  
48  
49  
50  
51  
52  
53  
54  
55  
56  
57  
58  
59  
60  
61  
62  
63  
64  
65

823  $SCC_{bg,adj} = \text{median}(SCC_{KOs \in \text{KEGG Module } m}) - \text{median}(SCC_{KOs \text{ KEGG Module } m})$

824 Where  $SCC_{KO}$  is the partial Spearman's correlation coefficient between KO and the metabolite  
825 cluster.

826 Identification of microbial species driving the association between KEGG Module and metabolite  
827 abundance was done by iterating the correlation between KO belonging to the KEGG module and  
828 the metabolite after excluding the genes annotated to that KO from each species. The change in  
829 median Spearman's correlation coefficient between the KOs and the metabolite, when genes from  
830 that species are excluded from the analysis, was calculated as described previously [8]. The species  
831 showing the maximum change in the overall correlation of module with metabotype was plotted.

832 **List of abbreviations**

833 Indian Gut Microbiome (IGM), Enterotypes (ET), Integrated Gene Catalog (IGC), Metagenome-  
834 Wide Association Study (MGWAS), Short Chain Fatty Acids (SCFAs), Branched Chain Amino  
835 Acids (BCAAs).

836 **Declarations**

837 **Collection of Datasets for Comparative analysis**

838 The 74 HMP metagenomes were collected from <http://hmpdacc.org/HMASM> or NCBI SRA  
839 (accession SRR059347). The 85 Danish fecal metagenomes from METAHIT were obtained from  
840 European Nucleotide Archive (<http://www.ebi.ac.uk/ena>, study accession number ERP000108).  
841 The 71 Chinese metagenome samples were obtained from NCBI SRA (accession number –  
842 SRR341581).

843 **Ethics approval and consent to participate**

1  
2  
3  
4  
5  
6  
7  
8  
9  
10  
11  
12  
13  
14  
15  
16  
17  
18  
19  
20  
21  
22  
23  
24  
25  
26  
27  
28  
29  
30  
31  
32  
33  
34  
35  
36  
37  
38  
39  
40  
41  
42  
43  
44  
45  
46  
47  
48  
49  
50  
51  
52  
53  
54  
55  
56  
57  
58  
59  
60  
61  
62  
63  
64  
65

844 The recruitment of volunteers, sample collection, and other study-related procedures were carried  
845 out by following the guidelines and protocols approved by the Institute Ethics Committee of Indian  
846 Institute of Science Education and Research (IISER), Bhopal, India. Written informed consent was  
847 obtained from all subjects prior to any study-related procedures.

**848 Consent for publication**

849 Not applicable

**850 Availability of data**

851 The datasets generated and/or analysed during the current study have been deposited in the  
852 National Centre for Biotechnology Information (NCBI) BioProject database under the project  
853 number PRJNA397112. Metabolomics data are available via the MetaboLights database  
854 (accession number MTBLS803). Supporting data are also available via the *GigaScience*  
855 repository, GigaDB [91].

**856 Competing interests**

857 The authors declare that they have no competing interests.

**858 Funding**

859 This work was supported by the intramural funding received from IISER Bhopal, Madhya Pradesh,  
860 India.

**861 Author's contributions**

862 VKS and AM conceived the work and participated in the design of the study. AM and JP collected  
863 all the samples in collaboration with TG. AM designed the study protocols and performed sample  
864 processing, DNA extraction, metabolite extraction and profiling from faecal and blood samples.  
865 RS and AM carried out the library preparation and sequencing work. DBD carried out all

1  
2  
3  
4  
5  
6  
7  
8  
9  
10  
11  
12  
13  
14  
15  
16  
17  
18  
19  
20  
21  
22  
23  
24  
25  
26  
27  
28  
29  
30  
31  
32  
33  
34  
35  
36  
37  
38  
39  
40  
41  
42  
43  
44  
45  
46  
47  
48  
49  
50  
51  
52  
53  
54  
55  
56  
57  
58  
59  
60  
61  
62  
63  
64  
65

866 metagenomic data and statistical analysis. AKS and DBD analyzed the metabolomics data. AM  
867 and DBD did the primary data interpretation of analytical outcomes under the supervision of VKS.  
868 AM, DBD, AKS, RS, AG, JS, KRA and VKS drafted the manuscript. All authors read and  
869 approved the final manuscript.

**870 Acknowledgments**

871 The sequencing and computational analysis were performed at the NGS Facility and HPC and  
872 computing facility, respectively, at IISER Bhopal. DBD, AM, RS and JP received fellowships  
873 from the UGC (University Grants Commission), Centre for Research on Environment and  
874 Sustainable Technologies (CREST, IISER Bhopal), DST-INSPIRE and Central University of  
875 Kerala, respectively.

876

1  
2  
3  
4 877 **References:**  
5  
6

- 7 878 1. Turnbaugh PJ, Ley RE, Hamady M, Fraser-Liggett CM, Knight R and Gordon JI. The human  
8 879 microbiome project. *Nature*. 2007;449 7164:804-10.  
9 880 2. Arumugam M, Raes J, Pelletier E, Le Paslier D, Yamada T, Mende DR, et al. Enterotypes of the  
10 881 human gut microbiome. *Nature*. 2011;473 7346:174-80.  
11 882 3. Yatsunencko T, Rey FE, Manary MJ, Trehan I, Dominguez-Bello MG, Contreras M, et al. Human gut  
12 883 microbiome viewed across age and geography. *Nature*. 2012;486 7402:222-7.  
13 884 4. Dominguez-Bello MG, Costello EK, Contreras M, Magris M, Hidalgo G, Fierer N, et al. Delivery  
14 885 mode shapes the acquisition and structure of the initial microbiota across multiple body habitats  
15 886 in newborns. *Proc Natl Acad Sci U S A*. 2010;107 26:11971-5.  
16 887 5. Saxena R and Sharma V. A metagenomic insight into the human microbiome: Its implications in  
17 888 health and disease. *Medical and Health Genomics*. Elsevier; 2015. p. 107-19.  
18 889 6. Schwartz A, Taras D, Schafer K, Beijer S, Bos NA, Donus C, et al. Microbiota and SCFA in lean and  
19 890 overweight healthy subjects. *Obesity (Silver Spring)*. 2010;18 1:190-5.  
20 891 7. Qin J, Li Y, Cai Z, Li S, Zhu J, Zhang F, et al. A metagenome-wide association study of gut microbiota  
21 892 in type 2 diabetes. *Nature*. 2012;490 7418:55-60.  
22 893 8. Pedersen HK, Gudmundsdottir V, Nielsen HB, Hyotylainen T, Nielsen T, Jensen BA, et al. Human  
23 894 gut microbes impact host serum metabolome and insulin sensitivity. *Nature*. 2016;535 7612:376-  
24 895 81.  
25 896 9. Gupta VK, Paul S and Dutta C. Geography, Ethnicity or Subsistence-Specific Variations in Human  
26 897 Microbiome Composition and Diversity. *Front Microbiol*. 2017;8:1162.  
27 898 10. Human Microbiome Project C. Structure, function and diversity of the healthy human  
28 899 microbiome. *Nature*. 2012;486 7402:207-14.  
29 900 11. Gomez A, Petrzelkova KJ, Burns MB, Yeoman CJ, Amato KR, Vlckova K, et al. Gut Microbiome of  
30 901 Coexisting BaAka Pygmies and Bantu Reflects Gradients of Traditional Subsistence Patterns. *Cell*  
31 902 *Rep*. 2016;14 9:2142-53.  
32 903 12. Obregon-Tito AJ, Tito RY, Metcalf J, Sankaranarayanan K, Clemente JC, Ursell LK, et al. Subsistence  
33 904 strategies in traditional societies distinguish gut microbiomes. *Nat Commun*. 2015;6:6505.  
34 905 13. Schnorr SL, Candela M, Rampelli S, Centanni M, Consolandi C, Basaglia G, et al. Gut microbiome  
35 906 of the Hadza hunter-gatherers. *Nat Commun*. 2014;5:3654.  
36 907 14. Hasler R, Kautz C, Rehman A, Podschun R, Gassling V, Brzoska P, et al. The antibiotic resistome  
37 908 and microbiota landscape of refugees from Syria, Iraq and Afghanistan in Germany. *Microbiome*.  
38 909 2018;6 1:37.  
39 910 15. Mohan V, Sandeep S, Deepa R, Shah B and Varghese C. Epidemiology of type 2 diabetes: Indian  
40 911 scenario. *Indian J Med Res*. 2007;125 3:217-30.  
41 912 16. Mushtaq MU, Gull S, Abdullah HM, Shahid U, Shad MA and Akram J. Waist circumference, waist-  
42 913 hip ratio and waist-height ratio percentiles and central obesity among Pakistani children aged five  
43 914 to twelve years. *BMC Pediatr*. 2011;11:105.  
44 915 17. Maji A, Misra R, Dhakan DB, Gupta V, Mahato NK, Saxena R, et al. Gut microbiome contributes to  
45 916 impairment of immunity in pulmonary tuberculosis patients by alteration of butyrate and  
46 917 propionate producers. *Environ Microbiol*. 2018;20 1:402-19.  
47 918 18. Pulikkan J, Maji A, Dhakan DB, Saxena R, Mohan B, Anto MM, et al. Gut Microbial Dysbiosis in  
48 919 Indian Children with Autism Spectrum Disorders. *Microb Ecol*. 2018;76 4:1102-14.  
49 920 19. Bhute S, Pande P, Shetty SA, Shelar R, Mane S, Kumbhare SV, et al. Molecular Characterization  
50 921 and Meta-Analysis of Gut Microbial Communities Illustrate Enrichment of *Prevotella* and  
51 922 *Megasphaera* in Indian Subjects. *Front Microbiol*. 2016;7:660.  
52  
53  
54  
55  
56  
57  
58  
59  
60  
61  
62  
63  
64  
65



1  
2  
3  
4  
5  
6  
7  
8  
9  
10  
11  
12  
13  
14  
15  
16  
17  
18  
19  
20  
21  
22  
23  
24  
25  
26  
27  
28  
29  
30  
31  
32  
33  
34  
35  
36  
37  
38  
39  
40  
41  
42  
43  
44  
45  
46  
47  
48  
49  
50  
51  
52  
53  
54  
55  
56  
57  
58  
59  
60  
61  
62  
63  
64  
65

923 20. Shetty SA, Marathe NP and Shouche YS. Opportunities and challenges for gut microbiome studies in the Indian population. *Microbiome*. 2013;1 1:24.

924

925 21. Tandon D, Haque MM, R S, Shaikh S, P S, Dubey AK, et al. A snapshot of gut microbiota of an adult urban population from Western region of India. *PLoS One*. 2018;13 4:e0195643.

926

927 22. Suryanarayana M, Agrawal A and Prabhu KS. Inequality-adjusted human development index for India's states. United Nations Development Programme (UNDP) India. [http://www.undp.org/content/dam/india/docs/inequality\\_adjusted\\_human\\_development\\_index\\_for\\_indias\\_state\\_1.pdf](http://www.undp.org/content/dam/india/docs/inequality_adjusted_human_development_index_for_indias_state_1.pdf) [NS], 2011.

928

929

930

931 23. Misra A, Pandey RM, Devi JR, Sharma R, Vikram NK and Khanna N. High prevalence of diabetes, obesity and dyslipidaemia in urban slum population in northern India. *Int J Obes Relat Metab Disord*. 2001;25 11:1722-9.

932

933

934 24. Li J, Jia H, Cai X, Zhong H, Feng Q, Sunagawa S, et al. An integrated catalog of reference genes in the human gut microbiome. *Nat Biotechnol*. 2014;32 8:834-41.

935

936 25. Qin J, Li R, Raes J, Arumugam M, Burgdorf KS, Manichanh C, et al. A human gut microbial gene catalogue established by metagenomic sequencing. *Nature*. 2010;464 7285:59-65.

937

938 26. Wang J and Jia H. Metagenome-wide association studies: fine-mining the microbiome. *Nat Rev Microbiol*. 2016;14 8:508-22.

939

940 27. Tyakht AV, Kostyukova ES, Popenko AS, Belenikin MS, Pavlenko AV, Larin AK, et al. Human gut microbiota community structures in urban and rural populations in Russia. *Nat Commun*. 2013;4:2469.

941

942

943 28. Liang C, Tseng HC, Chen HM, Wang WC, Chiu CM, Chang JY, et al. Diversity and enterotype in gut bacterial community of adults in Taiwan. *BMC Genomics*. 2017;18 Suppl 1:932.

944

945 29. Aleksandrowicz L, Tak M, Green R, Kinra S and Haines A. Comparison of food consumption in Indian adults between national and sub-national dietary data sources. *Br J Nutr*. 2017;117 7:1013-9.

946

947

948 30. Joy EJ, Green R, Agrawal S, Aleksandrowicz L, Bowen L, Kinra S, et al. Dietary patterns and non-communicable disease risk in Indian adults: secondary analysis of Indian Migration Study data. *Public Health Nutr*. 2017;20 11:1963-72.

949

950

951 31. Rios-Covian D, Ruas-Madiedo P, Margolles A, Gueimonde M, de Los Reyes-Gavilan CG and Salazar N. Intestinal Short Chain Fatty Acids and their Link with Diet and Human Health. *Front Microbiol*. 2016;7:185.

952

953

954 32. Kovatcheva-Datchary P, Nilsson A, Akrami R, Lee YS, De Vadder F, Arora T, et al. Dietary Fiber-Induced Improvement in Glucose Metabolism Is Associated with Increased Abundance of *Prevotella*. *Cell Metab*. 2015;22 6:971-82.

955

956

957 33. De Filippo C, Cavalieri D, Di Paola M, Ramazzotti M, Poullet JB, Massart S, et al. Impact of diet in shaping gut microbiota revealed by a comparative study in children from Europe and rural Africa. *Proc Natl Acad Sci U S A*. 2010;107 33:14691-6.

958

959

960 34. Ruiz-Capillas C and Jimenez-Colmenero F. Biogenic amines in meat and meat products. *Crit Rev Food Sci Nutr*. 2004;44 7-8:489-99.

961

962 35. Layman DK. The role of leucine in weight loss diets and glucose homeostasis. *J Nutr*. 2003;133 1:261S-7S.

963

964 36. Drevland RM, Waheed A and Graham DE. Enzymology and evolution of the pyruvate pathway to 2-oxobutyrate in *Methanocaldococcus jannaschii*. *J Bacteriol*. 2007;189 12:4391-400.

965

966 37. Wu GD, Chen J, Hoffmann C, Bittinger K, Chen YY, Keilbaugh SA, et al. Linking long-term dietary patterns with gut microbial enterotypes. *Science*. 2011;334 6052:105-8.

967

968 38. Cho I and Blaser MJ. The human microbiome: at the interface of health and disease. *Nat Rev Genet*. 2012;13 4:260-70.

969

- 1  
2  
3  
4 970 39. Green R, Milner J, Joy EJ, Agrawal S and Dangour AD. Dietary patterns in India: a systematic review.  
5 971 Br J Nutr. 2016;116 1:142-8.  
6 972 40. Martinez I, Stegen JC, Maldonado-Gomez MX, Eren AM, Siba PM, Greenhill AR, et al. The gut  
7 973 microbiota of rural papua new guineans: composition, diversity patterns, and ecological  
8 974 processes. Cell Rep. 2015;11 4:527-38.  
9 975 41. Ley RE. Gut microbiota in 2015: Prevotella in the gut: choose carefully. Nat Rev Gastroenterol  
10 976 Hepatol. 2016;13 2:69-70.  
11 977 42. Losasso C, Eckert EM, Mastroianni E, Villiger J, Mancin M, Patuzzi I, et al. Assessing the Influence of  
12 978 Vegan, Vegetarian and Omnivore Oriented Westernized Dietary Styles on Human Gut Microbiota:  
13 979 A Cross Sectional Study. Front Microbiol. 2018;9:317.  
14 980 43. Larsen JM. The immune response to Prevotella bacteria in chronic inflammatory disease.  
15 981 Immunology. 2017;151 4:363-74.  
16 982 44. Scher JU, Szczesnak A, Longman RS, Segata N, Ubeda C, Bielski C, et al. Expansion of intestinal  
17 983 Prevotella copri correlates with enhanced susceptibility to arthritis. Elife. 2013;2:e01202.  
18 984 45. Renz H, von Mutius E, Brandtzaeg P, Cookson WO, Autenrieth IB and Haller D. Gene-environment  
19 985 interactions in chronic inflammatory disease. Nat Immunol. 2011;12 4:273-7.  
20 986 46. Tremaroli V and Backhed F. Functional interactions between the gut microbiota and host  
21 987 metabolism. Nature. 2012;489 7415:242-9.  
22 988 47. Selhub EM, Logan AC and Bested AC. Fermented foods, microbiota, and mental health: ancient  
23 989 practice meets nutritional psychiatry. J Physiol Anthropol. 2014;33:2.  
24 990 48. Costea PI, Hildebrand F, Arumugam M, Backhed F, Blaser MJ, Bushman FD, et al. Enterotypes in  
25 991 the landscape of gut microbial community composition. Nat Microbiol. 2018;3 1:8-16.  
26 992 49. Jaarin K, Norliana M, Kamisah Y, Nursyafiza M and Qodriyah HMSJECC. Potential role of virgin  
27 993 coconut oil in reducing cardiovascular risk factors. 2014;20 8:3399-410.  
28 994 50. Boemeke L, Marcadenti A, Busnello FM, Gottschall CBAJOJoE and Diseases M. Effects of coconut  
29 995 oil on human health. 2015;5 07:84.  
30 996 51. Intahphuak S, Khonsung P and Panthong AJPb. Anti-inflammatory, analgesic, and antipyretic  
31 997 activities of virgin coconut oil. 2010;48 2:151-7.  
32 998 52. Nicholson JK, Holmes E, Kinross J, Burcelin R, Gibson G, Jia W, et al. Host-gut microbiota metabolic  
33 999 interactions. Science. 2012;336 6086:1262-7.  
34 1000 53. Boulange CL, Neves AL, Chilloux J, Nicholson JK and Dumas ME. Impact of the gut microbiota on  
35 1001 inflammation, obesity, and metabolic disease. Genome Med. 2016;8 1:42.  
36 1002 54. Neis EP, Dejong CH and Rensen SS. The role of microbial amino acid metabolism in host  
37 1003 metabolism. Nutrients. 2015;7 4:2930-46.  
38 1004 55. Li X, Shimizu Y and Kimura I. Gut microbial metabolite short-chain fatty acids and obesity. Biosci  
39 1005 Microbiota Food Health. 2017;36 4:135-40.  
40 1006 56. Longvah T, Ananta I, Bhaskarachary K and Venkaiah K. Indian food composition tables. National  
41 1007 Institute of Nutrition, Indian Council of Medical Research; 2017.  
42 1008 57. Patel RK and Jain M. NGS QC Toolkit: a toolkit for quality control of next generation sequencing  
43 1009 data. PloS one. 2012;7 2:e30619.  
44 1010 58. Magoc T and Salzberg SL. FLASH: fast length adjustment of short reads to improve genome  
45 1011 assemblies. Bioinformatics. 2011;27 21:2957-63.  
46 1012 59. Quast C, Pruesse E, Yilmaz P, Gerken J, Schweer T, Yarza P, et al. The SILVA ribosomal RNA gene  
47 1013 database project: improved data processing and web-based tools. Nucleic Acids Res. 2013;41  
48 1014 Database issue:D590-6.  
49 1015 60. Kuczynski J, Stombaugh J, Walters WA, Gonzalez A, Caporaso JG and Knight R. Using QIIME to  
50 1016 analyze 16S rRNA gene sequences from microbial communities. Curr Protoc Bioinformatics.  
51 1017 2011;Chapter 10:Unit 10 7.

61  
62  
63  
64  
65

1  
2  
3  
4 1018 61. Caporaso JG, Bittinger K, Bushman FD, DeSantis TZ, Andersen GL and Knight R. PyNAST: a flexible  
5 1019 tool for aligning sequences to a template alignment. *Bioinformatics*. 2010;26 2:266-7.  
6  
7 1020 62. Lozupone C, Lladser ME, Knights D, Stombaugh J and Knight R. UniFrac: an effective distance  
8 1021 metric for microbial community comparison. *ISME J*. 2011;5 2:169-72.  
9 1022 63. Peng Y, Leung HC, Yiu SM and Chin FY. IDBA-UD: a de novo assembler for single-cell and  
10 1023 metagenomic sequencing data with highly uneven depth. *Bioinformatics*. 2012;28 11:1420-8.  
11 1024 64. Niu B, Zhu Z, Fu L, Wu S and Li W. FR-HIT, a very fast program to recruit metagenomic reads to  
12 1025 homologous reference genomes. *Bioinformatics*. 2011;27 12:1704-5.  
13 1026 65. Zhu W, Lomsadze A and Borodovsky M. Ab initio gene identification in metagenomic sequences.  
14 1027 *Nucleic acids research*. 2010;38 12:e132-e.  
15 1028 66. Kent WJ. BLAT--the BLAST-like alignment tool. *Genome Res*. 2002;12 4:656-64.  
16 1029 67. Li R, Yu C, Li Y, Lam T-W, Yiu S-M, Kristiansen K, et al. SOAP2: an improved ultrafast tool for short  
17 1030 read alignment. *Bioinformatics*. 2009;25 15:1966-7.  
18 1031 68. Langmead B and Salzberg SL. Fast gapped-read alignment with Bowtie 2. *Nature methods*. 2012;9  
19 1032 4:357.  
20 1033 69. Zhang R and Lin Y. DEG 5.0, a database of essential genes in both prokaryotes and eukaryotes.  
21 1034 *Nucleic acids research*. 2008;37 suppl\_1:D455-D8.  
22 1035 70. Buchfink B, Xie C and Huson DH. Fast and sensitive protein alignment using DIAMOND. *Nature*  
23 1036 *methods*. 2014;12 1:59.  
24 1037 71. Powell S, Forslund K, Szklarczyk D, Trachana K, Roth A, Huerta-Cepas J, et al. eggNOG v4. 0: nested  
25 1038 orthology inference across 3686 organisms. *Nucleic acids research*. 2014;42 D1:D231-D9.  
26 1039 72. Lim T-S and Loh W-Y. A comparison of tests of equality of variances. *Computational Statistics &*  
27 1040 *Data Analysis*. 1996;22 3:287-301.  
28 1041 73. Nielsen HB, Almeida M, Juncker AS, Rasmussen S, Li J, Sunagawa S, et al. Identification and  
29 1042 assembly of genomes and genetic elements in complex metagenomic samples without using  
30 1043 reference genomes. *Nat Biotechnol*. 2014;32 8:822-8.  
31 1044 74. Altschul SF, Gish W, Miller W, Myers EW and Lipman DJ. Basic local alignment search tool. *Journal*  
32 1045 *of molecular biology*. 1990;215 3:403-10.  
33 1046 75. Suzek BE, Huang H, McGarvey P, Mazumder R and Wu CH. UniRef: comprehensive and non-  
34 1047 redundant UniProt reference clusters. *Bioinformatics*. 2007;23 10:1282-8.  
35 1048 76. Huson DH, Auch AF, Qi J and Schuster SC. MEGAN analysis of metagenomic data. *Genome*  
36 1049 *research*. 2007;17 3:377-86.  
37 1050 77. Phua LC, Koh PK, Cheah PY, Ho HK and Chan ECY. Global gas chromatography/time-of-flight mass  
38 1051 spectrometry (GC/TOFMS)-based metabonomic profiling of lyophilized human feces. *Journal of*  
39 1052 *Chromatography B*. 2013;937:103-13.  
40 1053 78. Psychogios N, Hau DD, Peng J, Guo AC, Mandal R, Bouatra S, et al. The human serum metabolome.  
41 1054 *PloS one*. 2011;6 2:e16957.  
42 1055 79. Gao X, Pujos-Guillot E, Martin J-F, Galan P, Juste C, Jia W, et al. Metabolite analysis of human fecal  
43 1056 water by gas chromatography/mass spectrometry with ethyl chloroformate derivatization.  
44 1057 *Analytical biochemistry*. 2009;393 2:163-75.  
45 1058 80. Worley B and Powers R. Multivariate Analysis in Metabolomics. *Curr Metabolomics*. 2013;1 1:92-  
46 1059 107.  
47 1060 81. Langfelder P and Horvath S. WGCNA: an R package for weighted correlation network analysis.  
48 1061 *BMC Bioinformatics*. 2008;9:559.  
49 1062 82. Kaufman L and Rousseeuw PJ. Partitioning around medoids (program pam). Finding groups in  
50 1063 data: an introduction to cluster analysis. 1990:68-125.  
51  
52  
53  
54  
55  
56  
57  
58  
59  
60  
61  
62  
63  
64  
65

1  
2  
3  
4  
5  
6  
7  
8  
9  
10  
11  
12  
13  
14  
15  
16  
17  
18  
19  
20  
21  
22  
23  
24  
25  
26  
27  
28  
29  
30  
31  
32  
33  
34  
35  
36  
37  
38  
39  
40  
41  
42  
43  
44  
45  
46  
47  
48  
49  
50  
51  
52  
53  
54  
55  
56  
57  
58  
59  
60  
61  
62  
63  
64  
65

1064 83. Liao M, Li Y, Kianifard F, Obi E and Arcona S. Cluster analysis and its application to healthcare  
1065 claims data: a study of end-stage renal disease patients who initiated hemodialysis. *BMC Nephrol.*  
1066 2016;17:25.

1067 84. McMurdie PJ and Holmes S. Waste not, want not: why rarefying microbiome data is inadmissible.  
1068 *PLoS Comput Biol.* 2014;10 4:e1003531.

1069 85. Liaw A and Wiener MJRn. Classification and regression by randomForest. 2002;2 3:18-22.

1070 86. Wilcoxon F. Individual comparisons of grouped data by ranking methods. *Journal of economic*  
1071 *entomology.* 1946;39 2:269-70.

1072 87. Benjamini Y, Drai D, Elmer G, Kafkafi N and Golani I. Controlling the false discovery rate in behavior  
1073 genetics research. *Behavioural brain research.* 2001;125 1-2:279-84.

1074 88. Love M, Anders S and Huber W. Differential analysis of count data—the DESeq2 package. *Genome*  
1075 *Biol.* 2014;15 550:10.1186.

1076 89. Kendall MG. Rank correlation methods. 1955.

1077 90. Olsson U, Drasgow F and Dorans NJ. The polyserial correlation coefficient. *Psychometrika.*  
1078 1982;47 3:337-47.

1079 91. Dhakan DB, Maji A, Sharma AK, Saxena R, Pulikkan J, Grace T, et al. Supporting data for "The  
1080 unique composition of Indian gut microbiome, gene catalogue and associated faecal metabolome  
1081 deciphered using multi-omics approaches" *GigaScience Database* 2019.  
1082 <http://dx.doi.org/10.5524/100548>

1083

**Table 1. Metagenomic datasets used for comparative analysis (Meta-analysis) of the microbiome and MGWAS**

| Dataset | No. of samples | Sequence data (GB) | No. of genes |
|---------|----------------|--------------------|--------------|
| INDIA   | 110            | 110                | 4,809,378    |
| USA     | 74             | 441                | 6,521,885    |
| DENMARK | 85             | 103.87             | 7,141,214    |
| CHINA   | 71             | 180.78             | 5,464,702    |

**Table2. PERMANOVA to assess the effect of Covariates on metabolomics profiles of samples**

| Variable        | Sum of Sq | Mean Sq  | F-Model | R <sup>2</sup> | P-value |
|-----------------|-----------|----------|---------|----------------|---------|
| <b>Location</b> | 0.05841   | 0.058406 | 4.9423  | 0.04455        | 0.0009  |
| <b>Diet</b>     | 0.04701   | 0.04701  | 4.2132  | 0.03586        | 0.0009  |
| <b>Age</b>      | 0.01618   | 0.01618  | 1.4505  | 0.0123         | 0.161   |
| <b>Gender</b>   | 0.00488   | 0.00488  | 0.4370  | 0.00373        | 0.927   |

**Table3. OPLS-DA model and its validation for different covariates as class of separation**

| Variable              | R <sup>2</sup> X | Q <sup>2</sup> (cumulative) | pR <sup>2</sup> | pQ <sup>2</sup> |
|-----------------------|------------------|-----------------------------|-----------------|-----------------|
| <b>Location</b>       | <b>0.165</b>     | <b>0.205</b>                | <b>0.005***</b> | <b>0.005***</b> |
| Diet                  | 0.168            | 0.123                       | 0.005***        | 0.005***        |
| Age                   | 0.155            | -0.00067                    | 0.075           | 0.065           |
| Gender                | 0.106            | -0.247                      | 0.145           | 0.96            |
| Cluster (Genus based) | 0.16             | 0.15                        | 0.005***        | 0.005***        |

pR<sup>2</sup> and pQ<sup>2</sup> show p-values for validation of OPLS-DA model with p value < 0.01 shown as significant (\*)

1  
2  
3  
4  
5  
6  
7  
8  
9  
10  
11  
12  
13  
14  
15  
16  
17  
18  
19  
20  
21  
22  
23  
24  
25  
26  
27  
28  
29  
30  
31  
32  
33  
34  
35  
36  
37  
38  
39  
40  
41  
42  
43  
44  
45  
46  
47  
48  
49  
50  
51  
52  
53  
54  
55  
56  
57  
58  
59  
60  
61  
62  
63  
64  
65

**Figure title and legends**

**Fig. 1. Comparison of Indian gut microbiome with other major populations using 16S rRNA gene and metagenomic datasets.** (A) Percentage of total reads that could be mapped to IGC and updated IGC containing Indian gene catalogue. Plotted are interquartile ranges (IQR in boxes), median (as dark lines in the boxes), lowest and highest values within 1.5 times the IQR (shown as whiskers extending from boxes) and outliers as points beyond these whiskers. The blue and red boxes showed percentage of reads mapped to IGC and updated IGC (containing the Indian microbial genes). (B) Principal Component Analysis using MGS/CAG proportion derived from MGWAS. The samples are plotted along with the MGS/CAGs having taxonomic annotations. The MGS/CAGs are coloured according to their phylum. Variations across populations are shown using PC1 and PC2 along with factor loadings of major MGS/CAGs as biplots. (C) Illustration of proportions of bacterial families in different populations and their composition as determined from 16S rRNA gene datasets (adult population only). The mean family compositions of abundant families ( $\geq 1\%$ ) are represented in separate pie plots from 10 different country-wise datasets, showing their overall microbial composition compared to Indian population.

**Fig. 2. Functional variations and differences between Indian populations and other populations determined from core & accessory microbial functions.** (A) Procrustes analysis was performed on Bray Curtis distances calculated from core EggNOG and accessory EggNOG abundance tables in all populations. PCA analysis shows the concordance of core and accessory functions in India, Denmark, USA and China populations. The red and black lines are associated with core and accessory datasets, respectively. (B) Eigenvalues calculated from PCA of samples using core EggNOGs and accessory EggNOGs are plotted. The boxplots showing for core and accessory eigenvalues for all samples in different populations are shown. Each box plot represents

1  
2  
3  
4 1115 the median shown as white line between the boxes, the upper and lower ends of the boxes  
5  
6 1116 representing upper quartile (75<sup>th</sup> percentile) and lower quartile (25<sup>th</sup> percentile). The whiskers  
7  
8  
9 1117 extending on both the ends represent 2.5\* IQR (Inter Quartile Range). The different coloured dots  
10  
11  
12 1118 overlaid for each sample are plotted over the box. The enrichment or depletion of (C) Egnog,  
13  
14 1119 and (D) Kegg functions in India compared to other populations are shown as volcano plots. The  
15  
16 1120 log-transformed FDR Adj. P-values calculated from negative binomial-based Wald test from  
17  
18  
19 1121 DESeq2 are plotted on the x-axis. The log odds ratio calculated for India vs Other datasets are  
20  
21 1122 plotted on the y-axis. The EggNOGs/KOs with P-value<0.05 are shown in Blue whereas those  
22  
23  
24 1123 having P-values>0.05 are shown in Red. The EggNOGs/KOs extending on right and left side and  
25  
26 1124 with P-value>0.05 are labelled as highly enriched in India and other datasets, respectively.

27  
28  
29 1125 **Fig. 3. Variations in gut microbiome at the two locations. (A)** Between class Analysis, which  
30  
31  
32 1126 visualizes results from PCA and clustering, using genus level abundance from 37 cross national  
33  
34 1127 dataset and genus abundance of 110 Indian samples obtained from mapping of reads to reference  
35  
36  
37 1128 genomes. The samples from LOC1 (cyan), LOC2 (pink) and 37 cross national samples from  
38  
39 1129 Arumugam et al. (grey and labelled) are placed into three distinct enterotypes based on clustering.  
40  
41 1130 **(B)** Significantly different genera (FDR Adj. P-value < 0.05; NB model-based Wald test) between  
42  
43  
44 1131 the two locations are shown as boxplots with boxes representing interquartile range (IQR), dark  
45  
46 1132 lines between the boxes representing median values and whiskers representing the 1.5 x IQR on  
47  
48  
49 1133 each side. **(C)** Scatterplot of log-transformed mean values of species abundance in LOC1 (n=53)  
50  
51 1134 and LOC2 (n = 57) individuals. Red colour gradient points represent differentially abundant (FDR  
52  
53  
54 1135 Adj. P< 0.05; NB model-based Wald test) species with lower p-values from Red to Blue.

55  
56  
57 1136 **Fig. 4. Between class analysis to identify metatypes and their associated metabolites. (A)**  
58  
59 1137 Metabolite clusters (MES) abundance profiles of samples were generated and their clustering was

60  
61  
62  
63  
64  
65

1  
2  
3  
4 1138 performed using PAM (partition around medoids) clustering. The between class and PCA of JSD  
5  
6  
7 1139 distances and PAM clustering identified 3 clusters to be optimum for their segregation using (B)  
8  
9 1140 Silhouette index. The metabolites valeric acids, and saturated fatty acids such as palmitic acid and  
10  
11 1141 stearic acid, were found higher in Cluster1. The carbohydrates such as glucose and galactose were  
12  
13  
14 1142 found higher in Cluster2. The branched chain amino acids, lauric acid and butyric acid were found  
15  
16 1143 higher in Cluster3. (C) OPLS-DA analysis using locations as classes shows locations as  
17  
18  
19 1144 differentiating factors in separating the samples based on their metabolomic profiles.  
20  
21

22 1145 **Fig. 5. Spearman's Rank correlations of metabolites with species and metabolic modules. (A)**  
23  
24 1146 Spearman's Rank Correlation coefficients were calculated between significantly different  
25  
26  
27 1147 metagenomic species and significantly different metabolites between LOC1 and LOC2  
28  
29 1148 populations. The correlations showing significant FDR Adj. P <0.05 are plotted. The bars on the  
30  
31  
32 1149 right show the Log Odds Ratio of the abundance of MGS with positive values indicating  
33  
34 1150 enrichment in LOC1, and the negative values indicating enrichment in LOC2. (B) Spearman's  
35  
36  
37 1151 Rank correlations between significantly different (FDR Adj. P<0.05, NB model-based Wald test)  
38  
39 1152 pathway modules and significantly different metabolite abundances in all samples. The significant  
40  
41  
42 1153 (P<0.05) correlations are plotted and the colour intensities depict the correlation coefficients. The  
43  
44 1154 correlation of metabolites with locations is shown with labels in dark red colours showing  
45  
46 1155 association with LOC2, and the labels in green colours showing correlation with LOC1.  
47  
48

49 1156 **Fig. 6. BCAA abundance and their differential correlation with LOC1 and LOC2. (A)** Bar  
50  
51  
52 1157 plot showing z-normalized values of serum and faecal BCAA (Valine and Isoleucine) relative  
53  
54 1158 concentration in LOC1 and LOC2. (B) The effect of specific microbial species on associations  
55  
56  
57 1159 between BCAA biosynthesis pathways and BCAA levels in faecal metabolome, illustrated by  
58  
59 1160 change in background adjusted Spearman's correlation coefficient when a given species has been  
60  
61  
62  
63  
64  
65



1  
2  
3  
4 1161 excluded from analysis is shown (see Methods). The density plot shows the distribution of  
5  
6  
7 1162 correlation for species and the changes caused by specific species as marked by lines below. (C)  
8  
9 1163 Network analysis of Spearman's correlations between the branched chain amino acids  
10  
11  
12 1164 biosynthesis, degradation and transport KEGG modules with MGS abundance in both LOC1 and  
13  
14 1165 LOC2 populations. The node size is proportional to the degree of interactions and the links between  
15  
16  
17 1166 module and MGS show interactions or significant correlations (FDR Adj.  $P < 0.05$ ) with negative  
18  
19 1167 (in Red) and positive (in Blue) correlation coefficients. (D) Plot showing relative abundance of  
20  
21 1168 KOs associated with different modules of BCAA biosynthesis and transporters in LOC1 and  
22  
23  
24 1169 LOC2.

25  
26  
27 1170 **Fig. 7. BCAA transporters playing a key role in maintaining the levels of BCAAs in faeces**  
28  
29 1171 **and serum**

30  
31  
32  
33 1172 The dynamics of BCAA concentration levels in faecal and serum metabolome influenced by  
34  
35 1173 microbial BCAA biosynthesis and transport pathways and their differential abundance in LOC1  
36  
37 1174 and LOC2 is shown

38  
39  
40  
41 1175

42  
43  
44 1176 **Additional Files**

45  
46  
47 1177 **Additional File 1:** Supplementary data containing the metadata and sample information

48  
49  
50 1178 **Additional File 2:** Summary of sequencing statistics showing the number of reads per sample for  
51  
52 1179 16S rRNA gene amplicon dataset

53  
54  
55 1180 **Additional File 3:** Summary of sequencing statistics showing the number of reads per sample for  
56  
57  
58 1181 Whole Genome Shotgun metagenomic dataset

59  
60  
61  
62  
63  
64  
65

1  
2  
3  
4 1182 **Additional File 4:** Summary of the reads mapped to Integrated Gene Catalogue and Indian  
5  
6 1183 catalogue combined with IGC.  
7  
8  
9  
10 1184 **Additional File 5: Figures S1 to S18**  
11  
12  
13 1185 **Additional File 6:** Differentially abundant MGS between India and other populations  
14  
15  
16 1186 **Additional File 7:** Differentially abundant functions (Kegg Orthologues (KOs) and EggNOGs)  
17  
18 1187 between India and other populations.  
19  
20  
21 1188 **Additional File 8:** Sample-wise representation of Indian samples into Enterotypes identified from  
22  
23 1189 Meta-analysis with 37 samples from four nations used in Arumugam et al.  
24  
25  
26 1190 **Additional File 9:** Calinski Harabasz index and prediction strength calculated for clusters derived  
27  
28 1191 from 16S rRNA gene based genus abundance, metagenome based species abundance and  
29  
30 1192 metagenome based KO abundance profiles.  
31  
32  
33 1193 **Additional File 10:** Mean relative abundance of genus in Cluster-1 and Cluster-2 and their  
34  
35 1194 associated P-values of difference calculated using NB model based Wald test.  
36  
37  
38 1195 **Additional File 11:** The sample-wise association into clusters using Genus based and KO based  
39  
40 1196 clustering and their differences.  
41  
42  
43 1197 **Additional File 12:** Differentially abundant KEGG orthologue functions between Cluster-1 and  
44  
45 1198 Cluster-2.  
46  
47  
48  
49  
50  
51 1199 **Additional File 13:** Polyserial correlation of covariates with principal components explaining  
52  
53 1200 variations across samples using unweighted UniFrac distances.  
54  
55  
56  
57 1201 **Additional File 14:** Differentially abundant MGS observed between two locations and their  
58  
59 1202 enrichment calculated using Log Odds ratio and NB model based P-values.  
60  
61  
62  
63  
64  
65

1  
2  
3  
4  
5  
6  
7  
8  
9  
10  
11  
12  
13  
14  
15  
16  
17  
18  
19  
20  
21  
22  
23  
24  
25  
26  
27  
28  
29  
30  
31  
32  
33  
34  
35  
36  
37  
38  
39  
40  
41  
42  
43  
44  
45  
46  
47  
48  
49  
50  
51  
52  
53  
54  
55  
56  
57  
58  
59  
60  
61  
62  
63  
64  
65

**Additional File 15:** Polyserial correlation of covariates with principal components explaining variations across samples using metabolomics data.

**Additional File 16:** Table shows the Spearman's rank correlation coefficient values of metabolites with Metabotypes.

**Additional File 17:** Table shows the differential abundance of KEGG Modules between LOC1 and LOC2

**Additional File 18:** List of reference genomes from NCBI and HMP databases for reference mapping

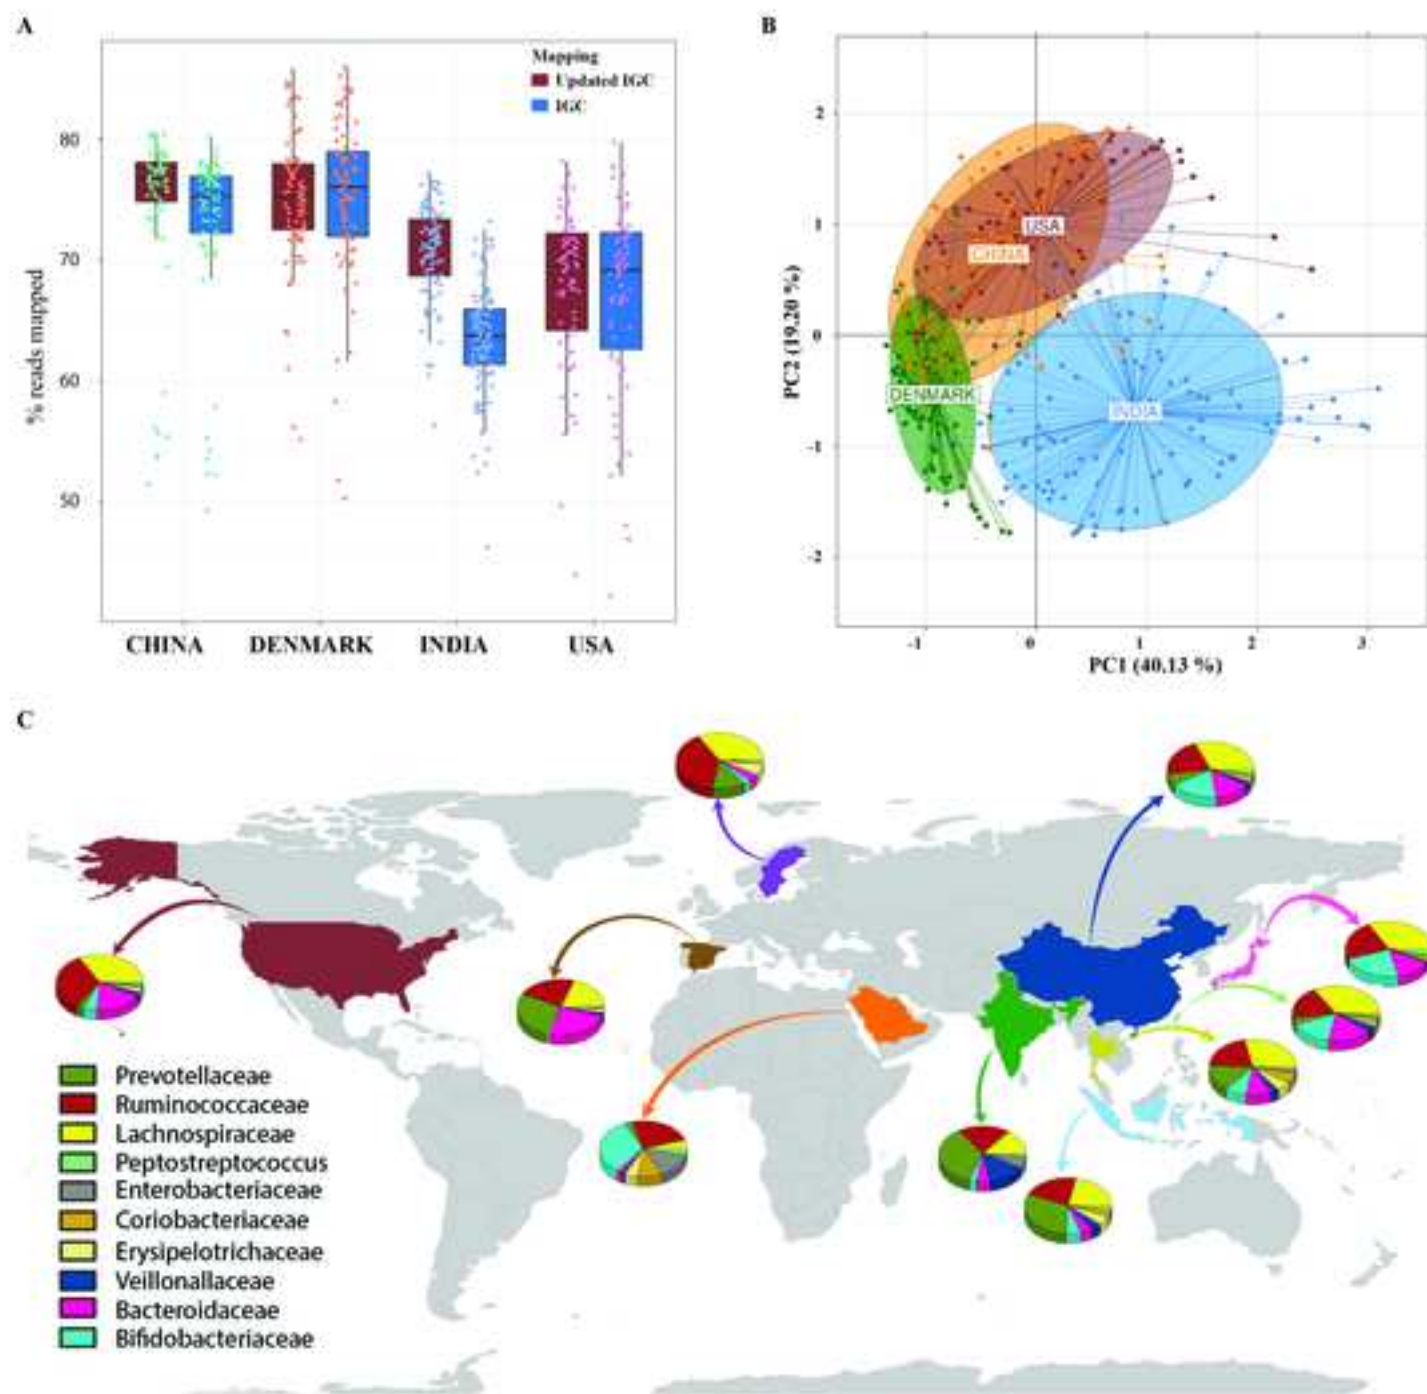

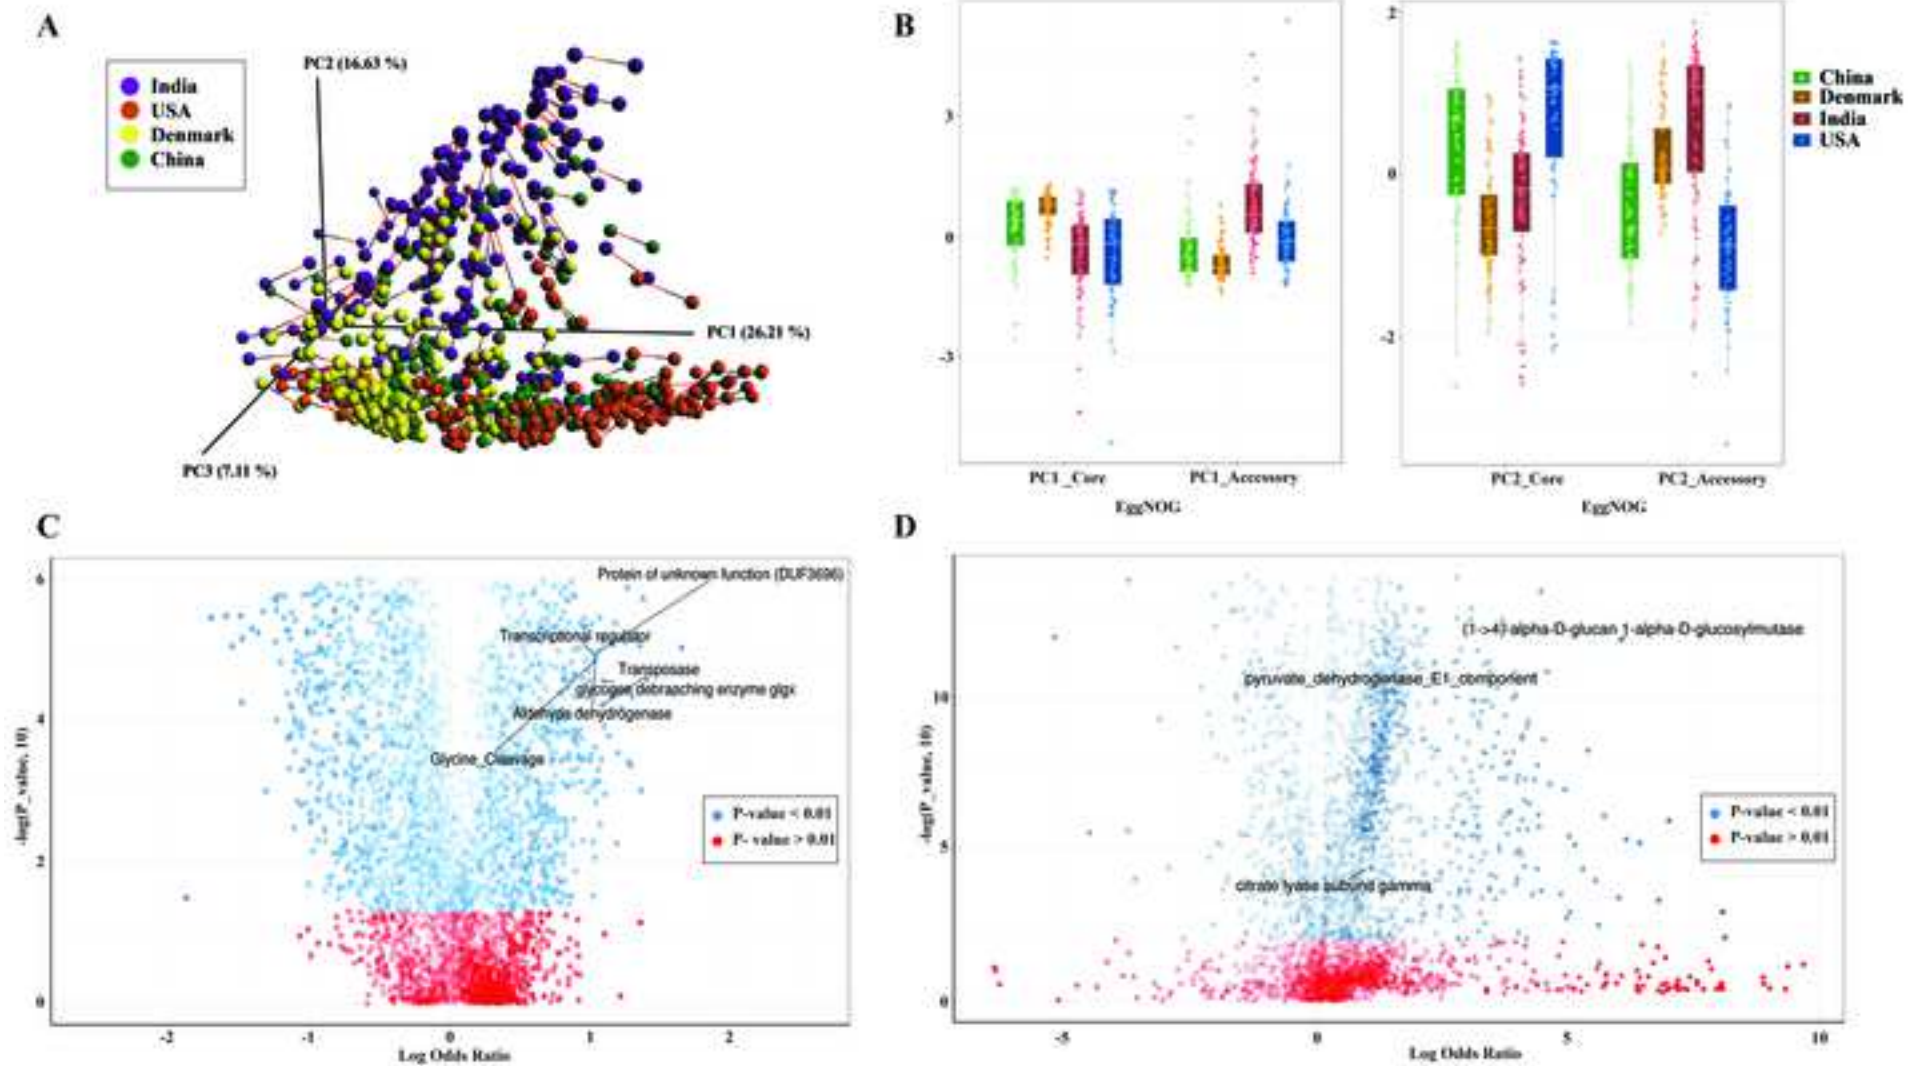

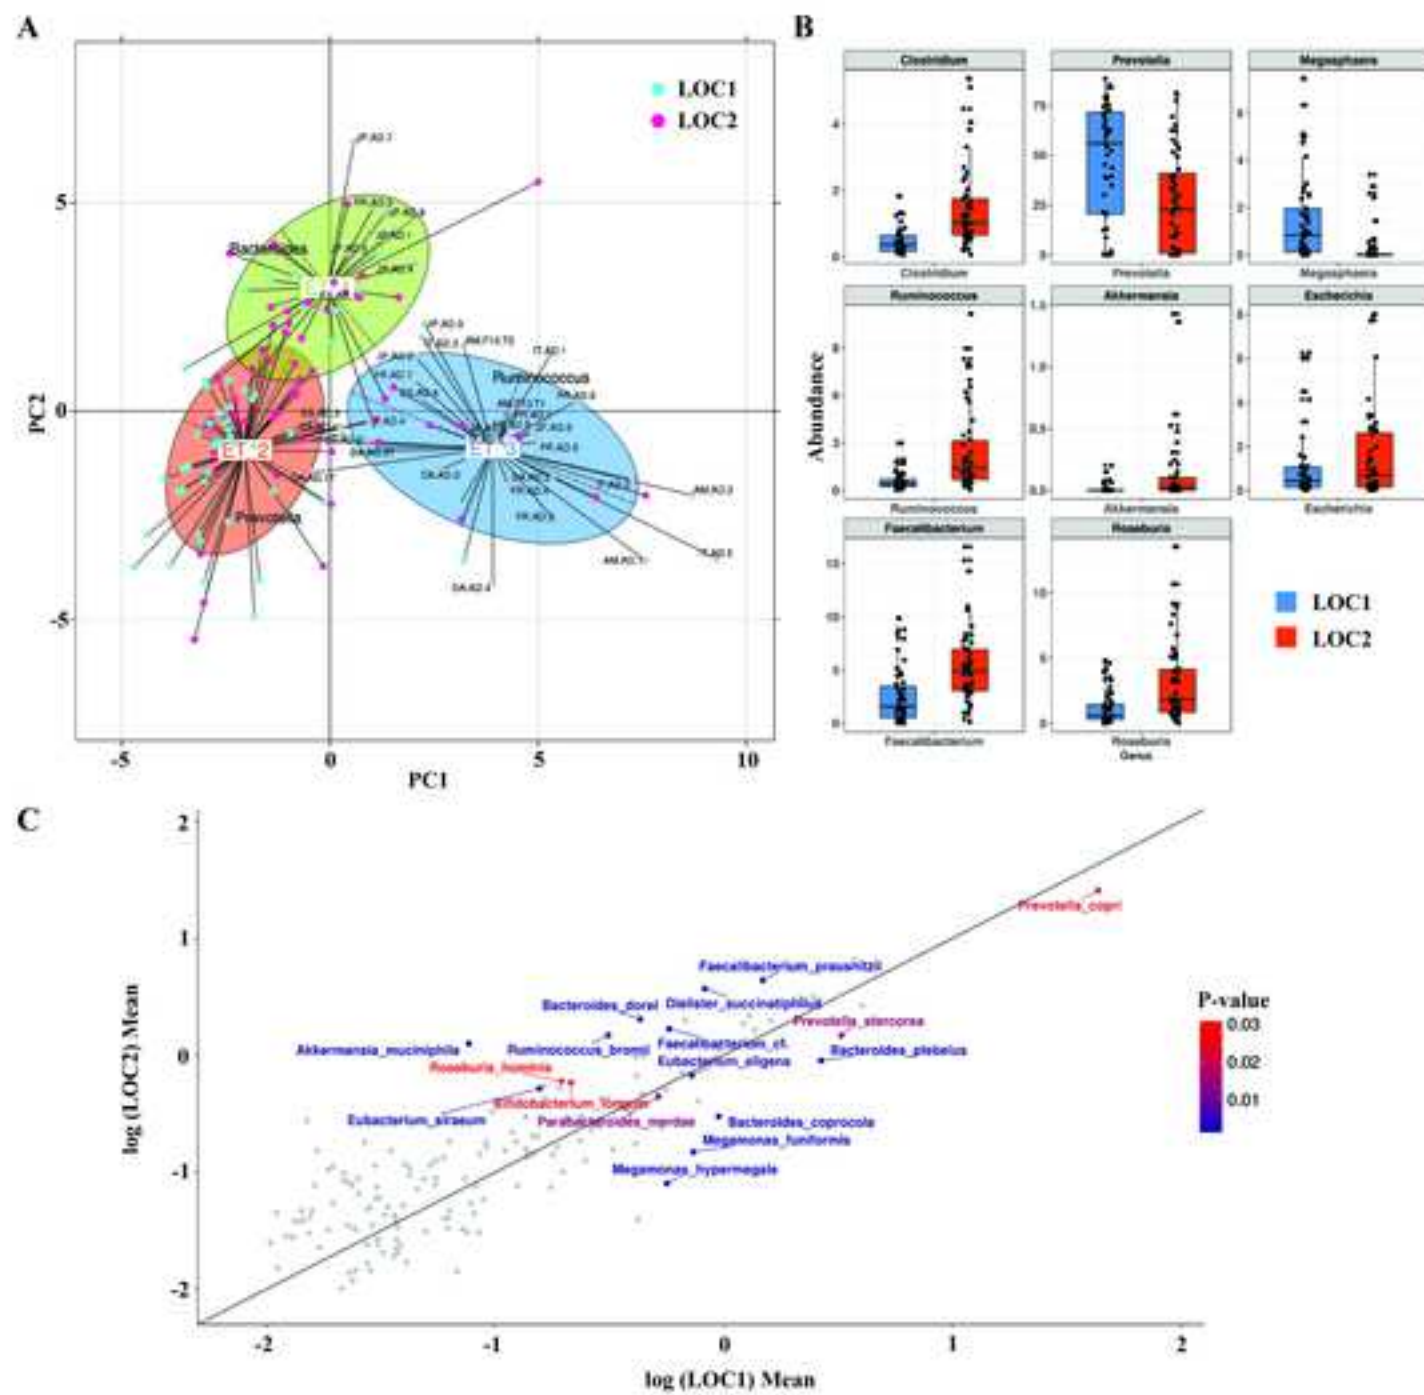



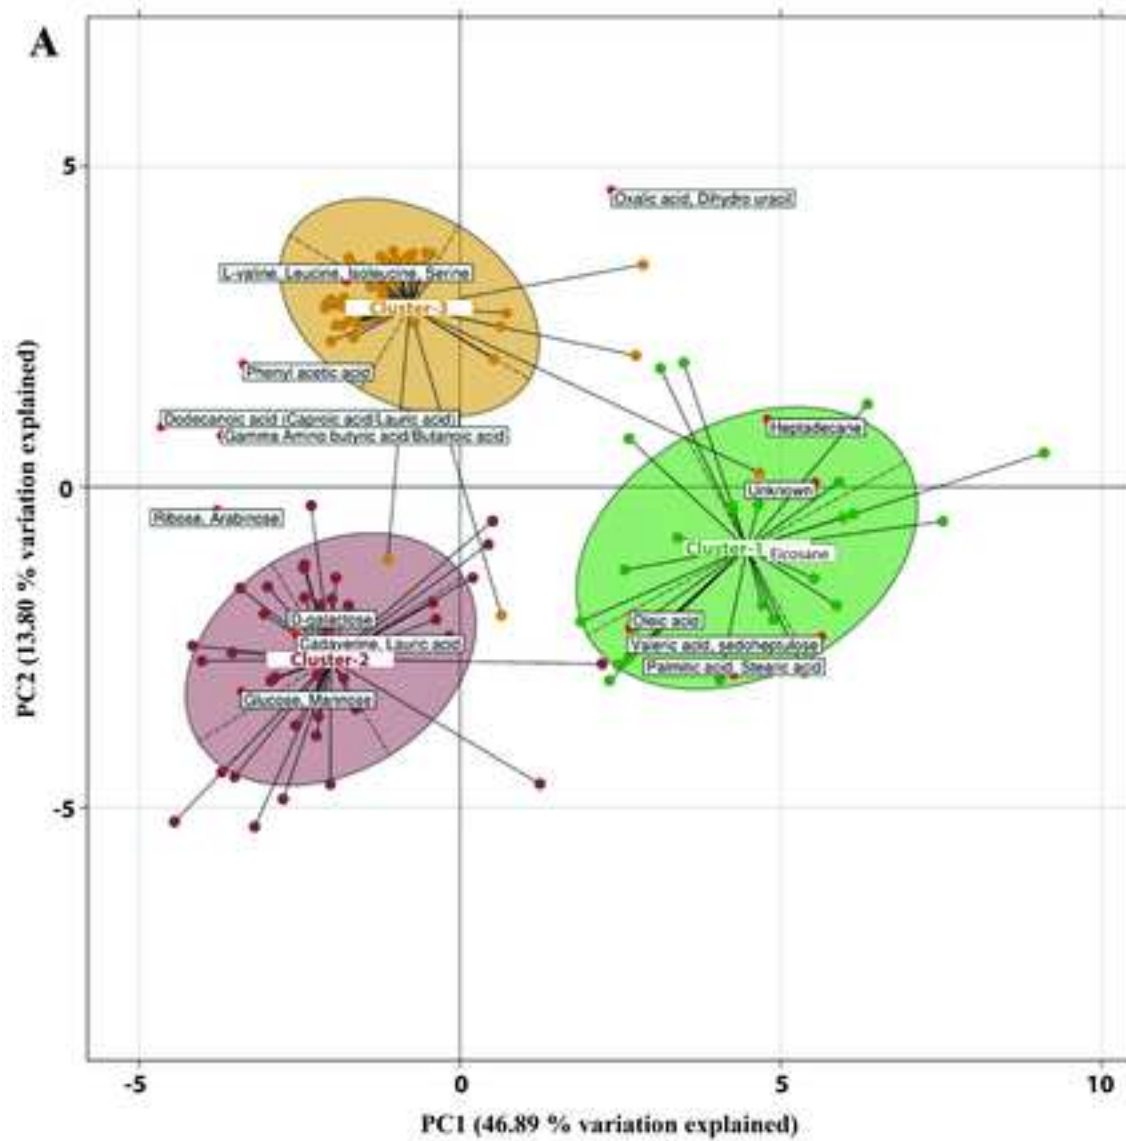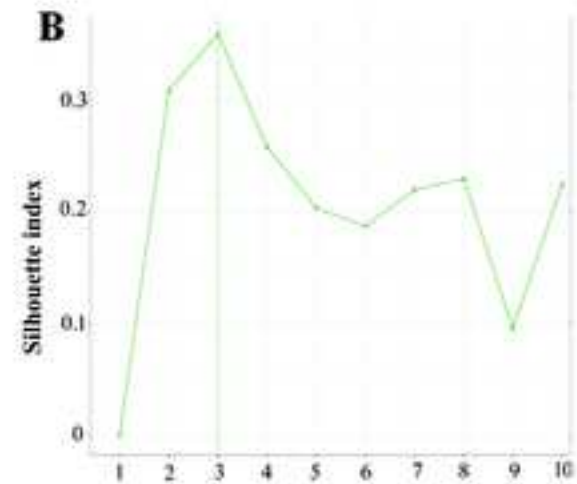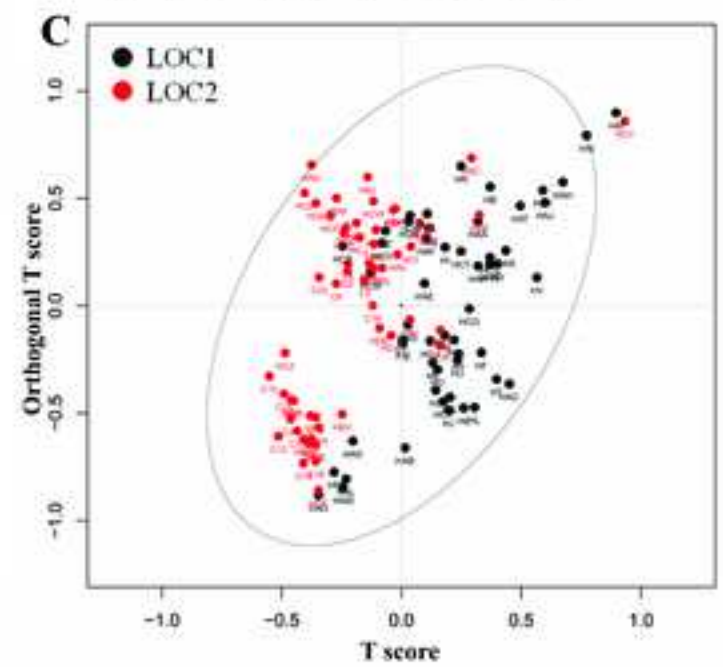

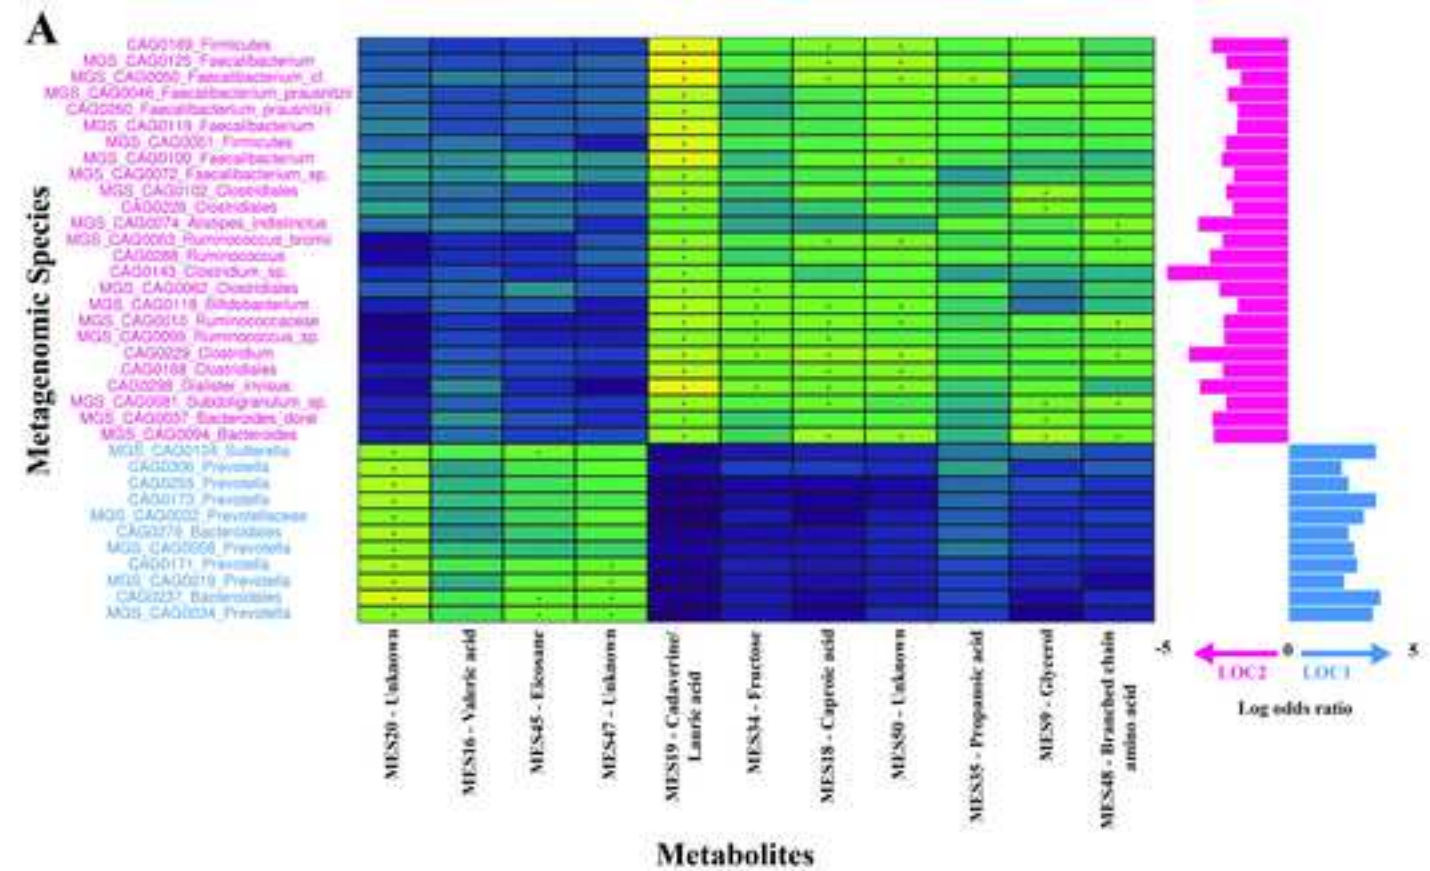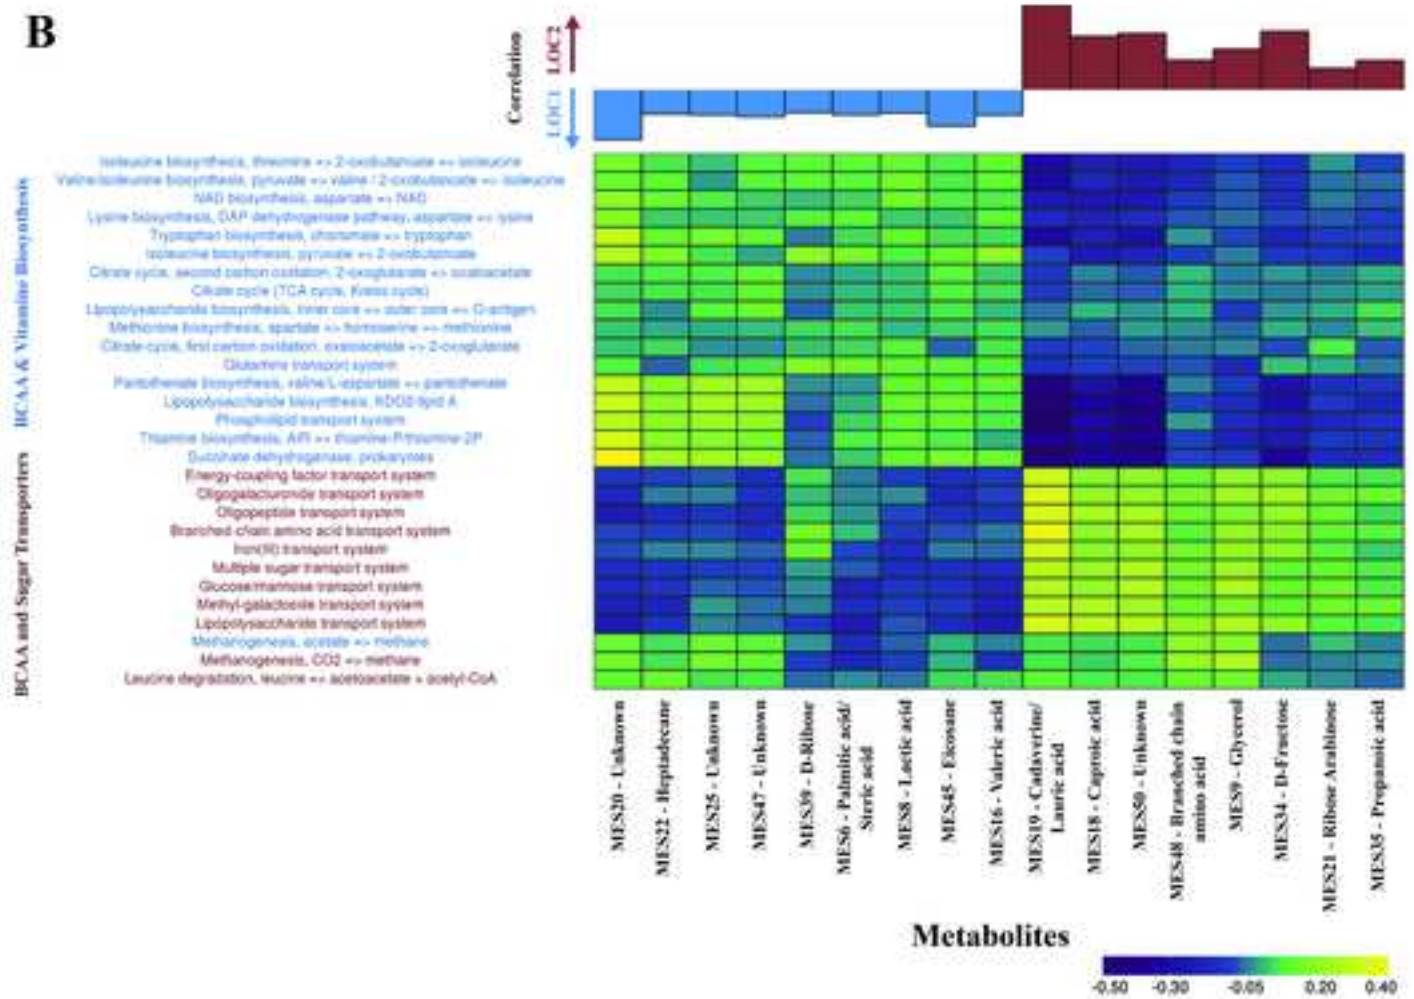



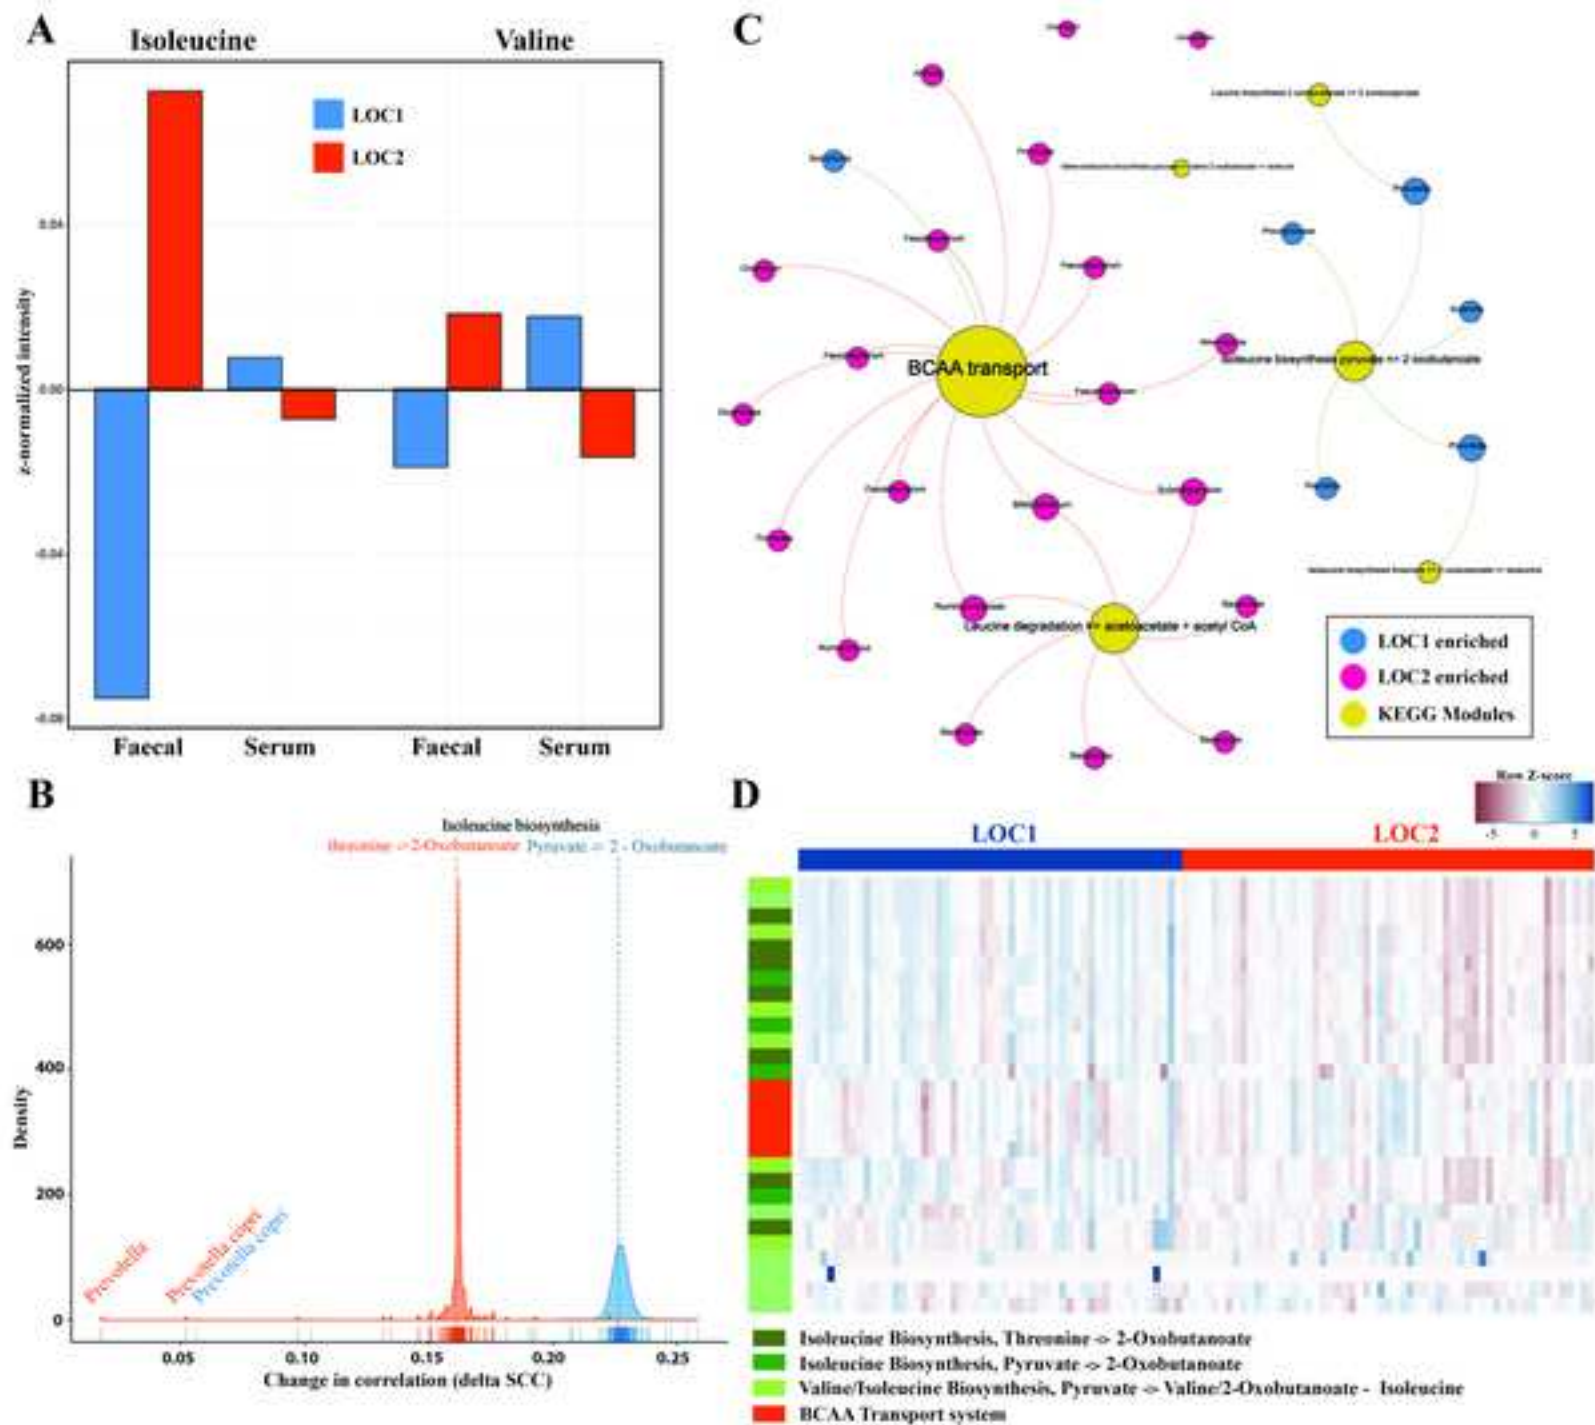

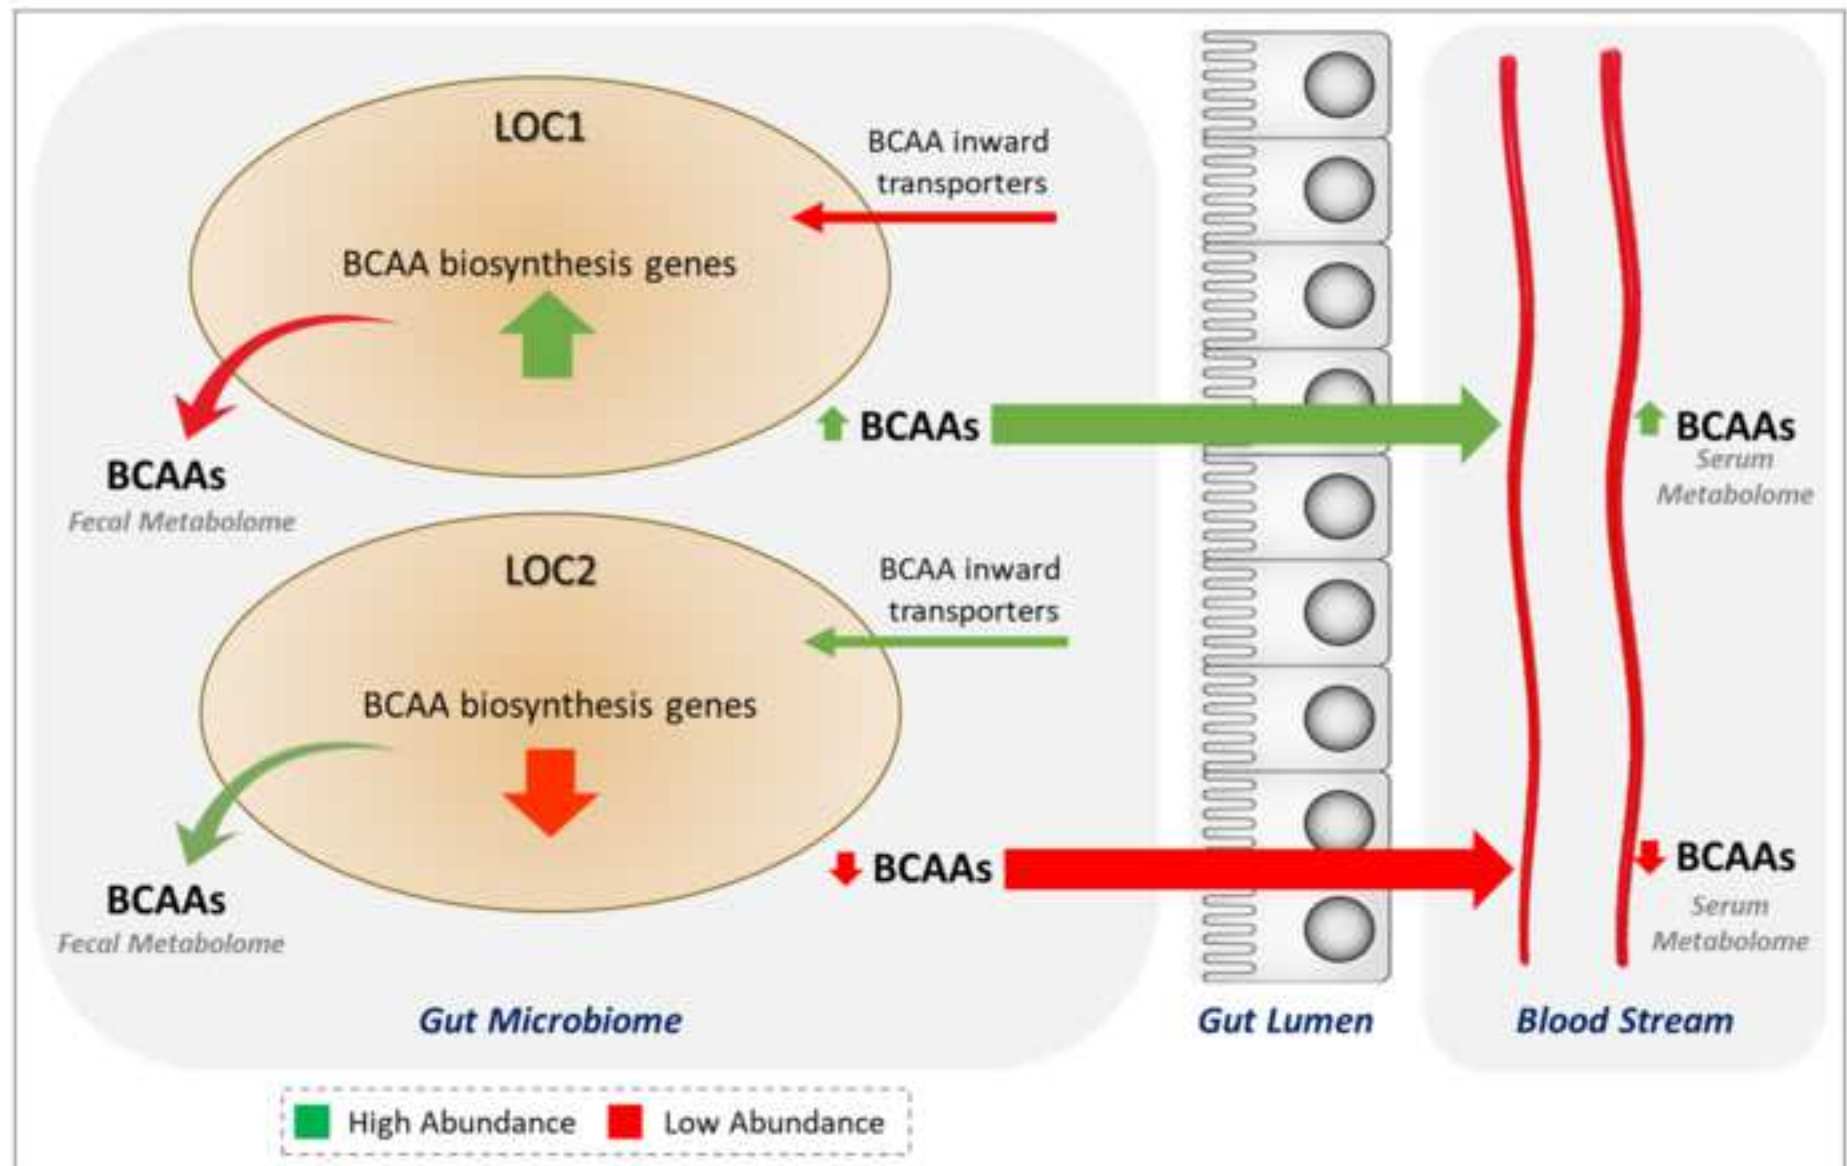

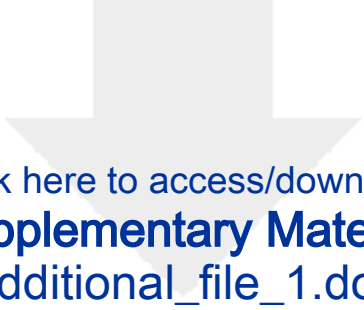

Click here to access/download  
**Supplementary Material**  
Additional\_file\_1.doc



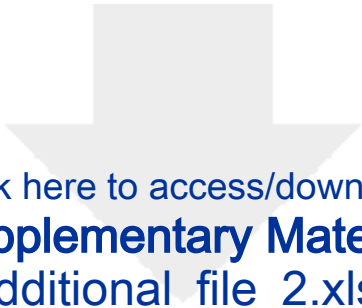

Click here to access/download  
**Supplementary Material**  
Additional\_file\_2.xlsx



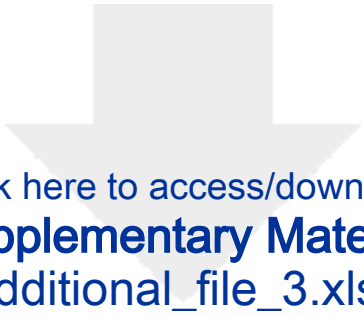

Click here to access/download  
**Supplementary Material**  
Additional\_file\_3.xlsx



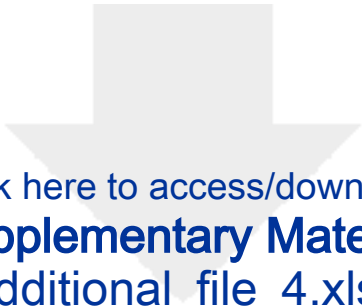

Click here to access/download  
**Supplementary Material**  
Additional\_file\_4.xlsx



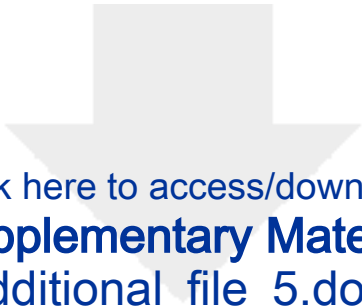

Click here to access/download  
**Supplementary Material**  
Additional\_file\_5.docx



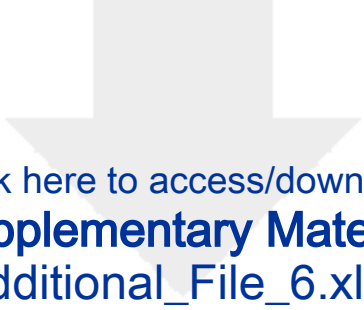

Click here to access/download  
**Supplementary Material**  
Additional\_File\_6.xlsx



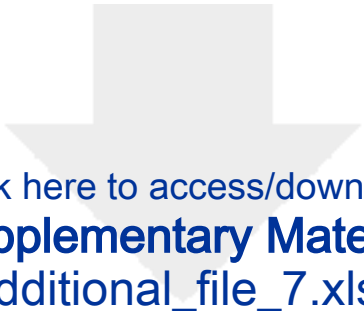

Click here to access/download  
**Supplementary Material**  
Additional\_file\_7.xlsx



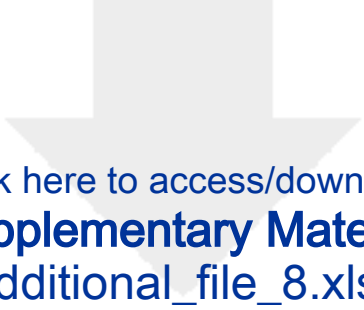

Click here to access/download  
**Supplementary Material**  
Additional\_file\_8.xlsx

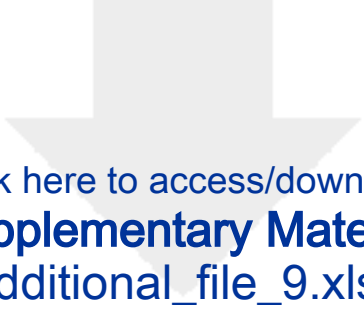

Click here to access/download  
**Supplementary Material**  
Additional\_file\_9.xlsx



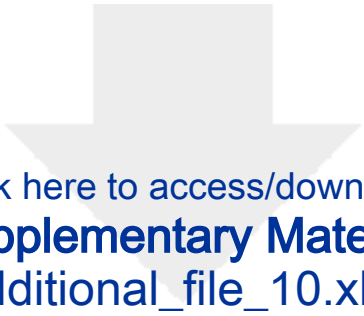

Click here to access/download  
**Supplementary Material**  
Additional\_file\_10.xlsx



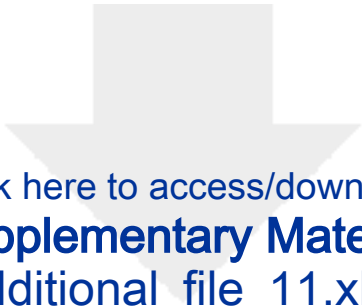

Click here to access/download  
**Supplementary Material**  
Additional\_file\_11.xlsx



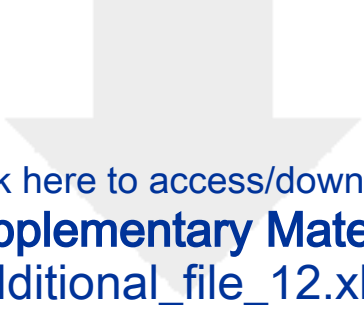

Click here to access/download  
**Supplementary Material**  
Additional\_file\_12.xlsx

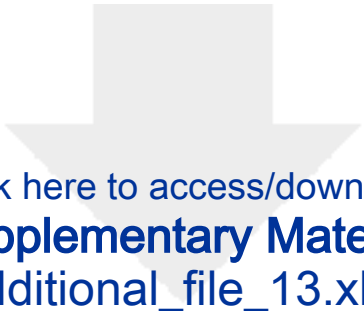

Click here to access/download  
**Supplementary Material**  
Additional\_file\_13.xlsx





Click here to access/download  
**Supplementary Material**  
Additional\_file\_14.xlsx





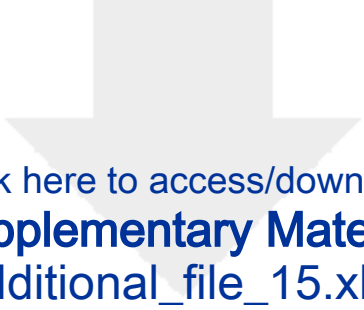

Click here to access/download  
**Supplementary Material**  
Additional\_file\_15.xlsx



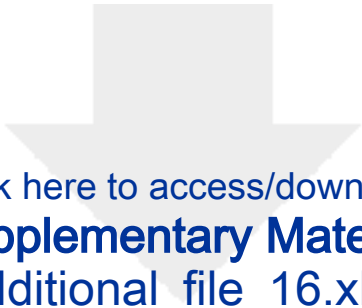

Click here to access/download  
**Supplementary Material**  
Additional\_file\_16.xlsx



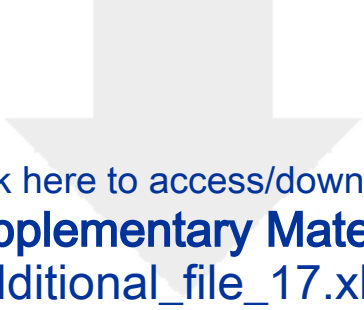

Click here to access/download  
**Supplementary Material**  
Additional\_file\_17.xlsx

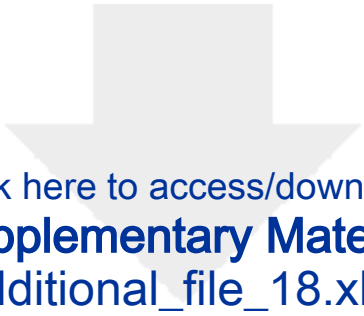

Click here to access/download  
**Supplementary Material**  
Additional\_file\_18.xlsx



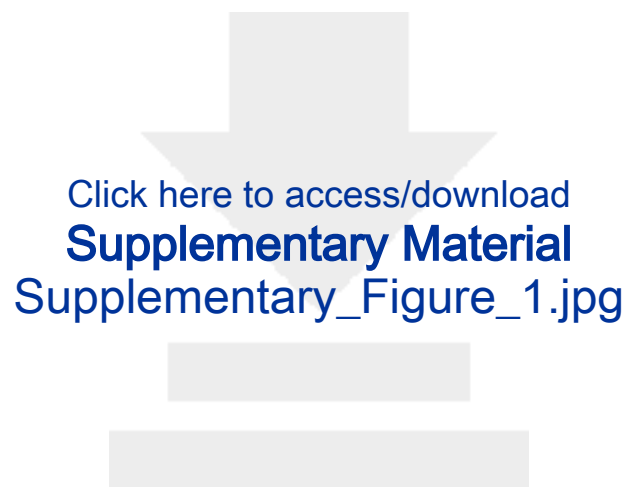

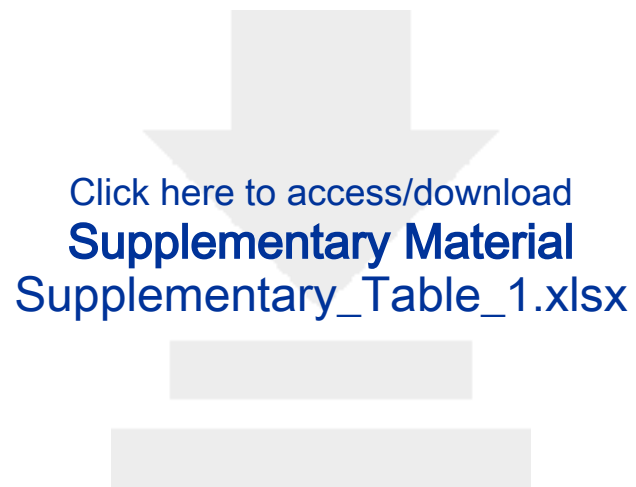

Supplement: giz004_giga-d-18-00212_revision_2.pdf [file giz004_giga-d-18-00212_revision_2.pdf]
